# Supplementary material for: Thiazole-fused androstenone and ethisterone derivatives: potent β- and γ-actin cytoskeleton inhibitors to treat melanoma tumors
Source: Royal Society of Chemistry journal article supplement (doi:10.1039/d4md00719k), 2024-12-06
Supplement: d4md00719k1.pdf [file d4md00719k1.pdf]

## Thiazole-fused Androstene and Ethisterone Derivatives: Potent $\beta$ - and $\gamma$ -Actin Cytoskeleton Inhibitors to Treat Melanoma Tumors

Sanjay Adhikary,<sup>1</sup> Subrata Roy,<sup>1,2</sup> Shailesh Budhathoki,<sup>3</sup> Siam Chowdhury,<sup>1,4</sup> Abbey Stillwell,<sup>1</sup> Alexei G. Basnakian,<sup>5,6</sup> Alan Tackett,<sup>7</sup> Nathan Avaritt,<sup>7</sup> Mohamed Milad,<sup>8</sup> Mohammad Abrar Alam\*<sup>1,2,3,9</sup>

<sup>1</sup>Department of Chemistry and Physics, College of Sciences and Mathematics, Arkansas State University, Jonesboro, Arkansas, 72467, United States

<sup>2</sup>Environmental Sciences Program, College of Sciences and Mathematics, Arkansas State University, Jonesboro, AR, 72467, USA

<sup>3</sup>Molecular Biosciences Program, College of Sciences and Mathematics, Arkansas State University, Jonesboro, AR, 72467, USA

<sup>4</sup>Computer Science, The College of Engineering & Computer Science, Arkansas State University, Jonesboro, AR, 72468, USA

<sup>5</sup>Department of Pharmacology and Toxicology, University of Arkansas for Medical Sciences, 4301 W. Markham St., Little Rock, AR 72205, USA

<sup>6</sup>Central Arkansas Veterans Healthcare System, W. 7th St., Little Rock, AR 72205, USA

<sup>7</sup>Department of Biochemistry and Molecular Biology, University of Arkansas for Medical Sciences, Little Rock, AR, 72205, USA

<sup>8</sup>The Department of Mathematics and Statistics, Arkansas State University, Jonesboro, AR, 72467, USA

<sup>9</sup>Arkansas Biosciences Institute, Arkansas State University, Jonesboro, AR, 72467, USA

Corresponding author: [malam@astate.edu](mailto:malam@astate.edu)

## Contents

|                                                                           |             |
|---------------------------------------------------------------------------|-------------|
| 1. Reaction procedures                                                    | .....S2     |
| 2. <sup>1</sup> H, <sup>13</sup> C NMR, High-resolution mass spectroscopy | .....S4-S70 |

*Synthesis of fused-thiazolo androstenedione*

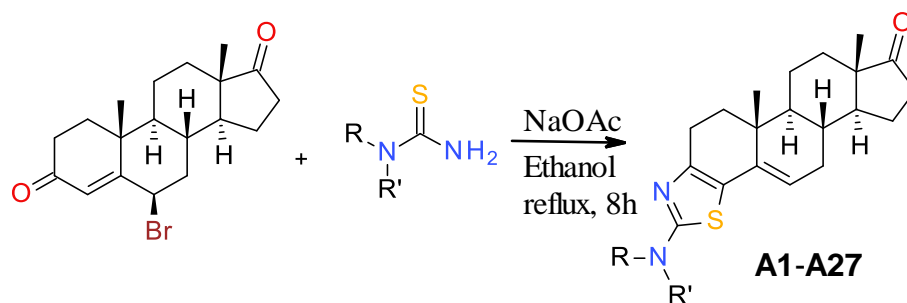

**Scheme S1:** Synthesis of fused aminothiazolo-androstenedione derivatives (A1-A27)

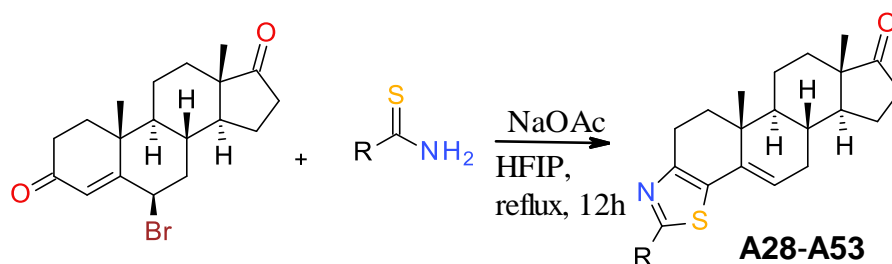

**Scheme S2:** Synthesis of fused thiazol-androstenedione derivatives (A1-A27)

*Synthesis of ethisterone-epoxyketone*

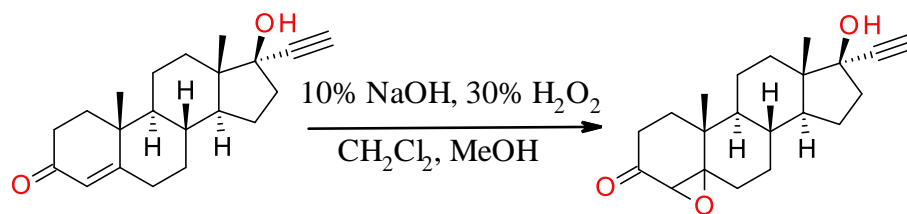

**Scheme S3:** Synthesis of epoxy ethisterone

*Synthesis of fused thiazolo-ethisterone*

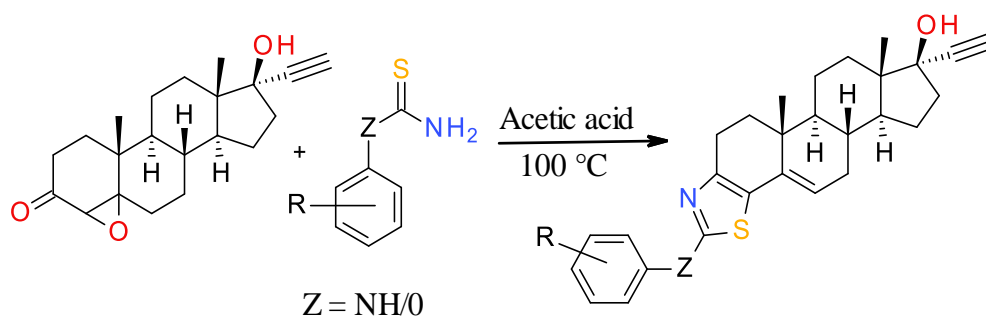

**Scheme S4:** Synthesis of fused thiazolo-ethisterone derivatives

(1*S*,2*R*,13*R*,14*S*,18*S*)-7-(4-Fluoroanilino)-2,18-dimethyl-8-thia-6-azapentacyclo[11.7.0.0<sup>2,10</sup>.0<sup>5,9</sup>.0<sup>14,18</sup>]icosa-5(9),6,10-trien-17-one (A15)

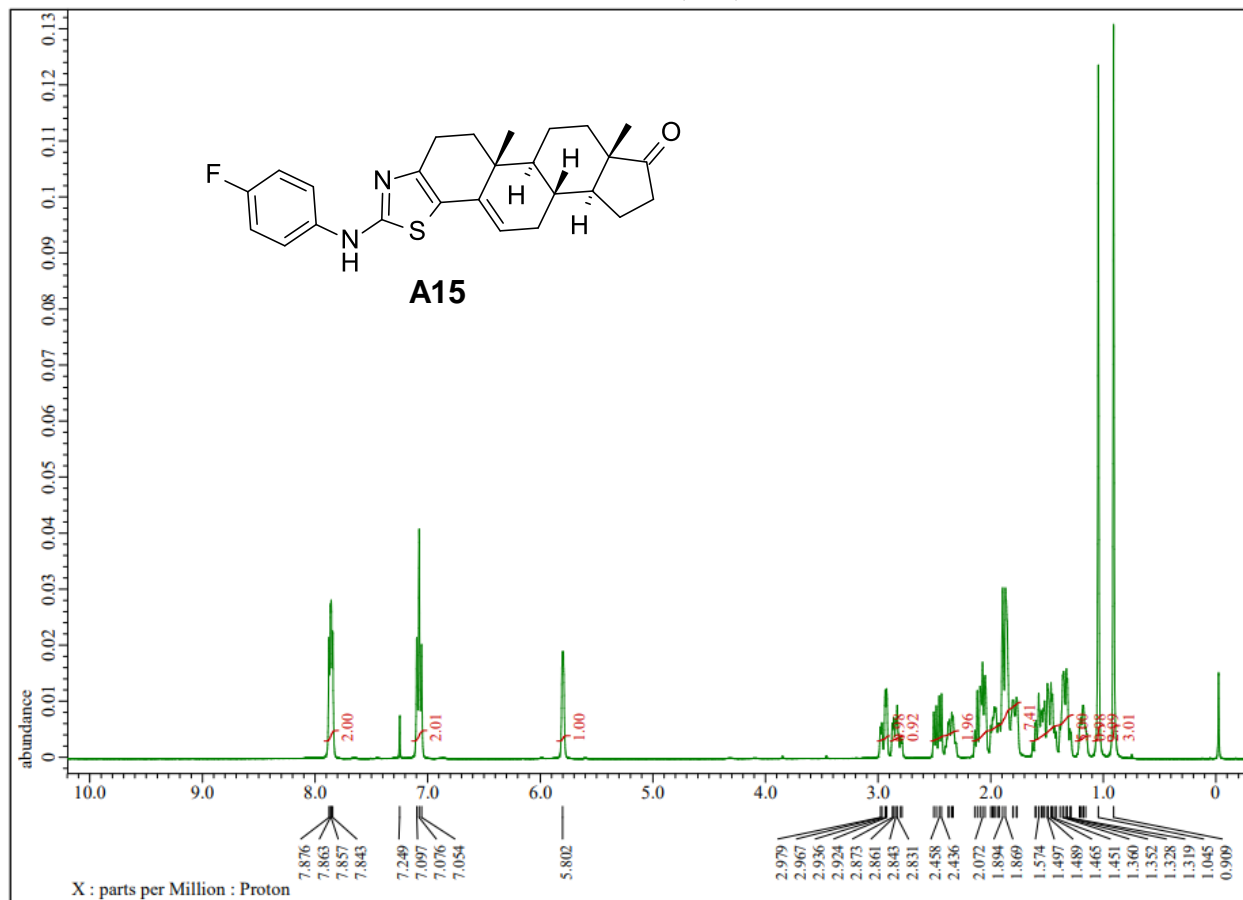

Figure S-1: <sup>1</sup>H NMR spectrum of compound A15 in CDCl<sub>3</sub>

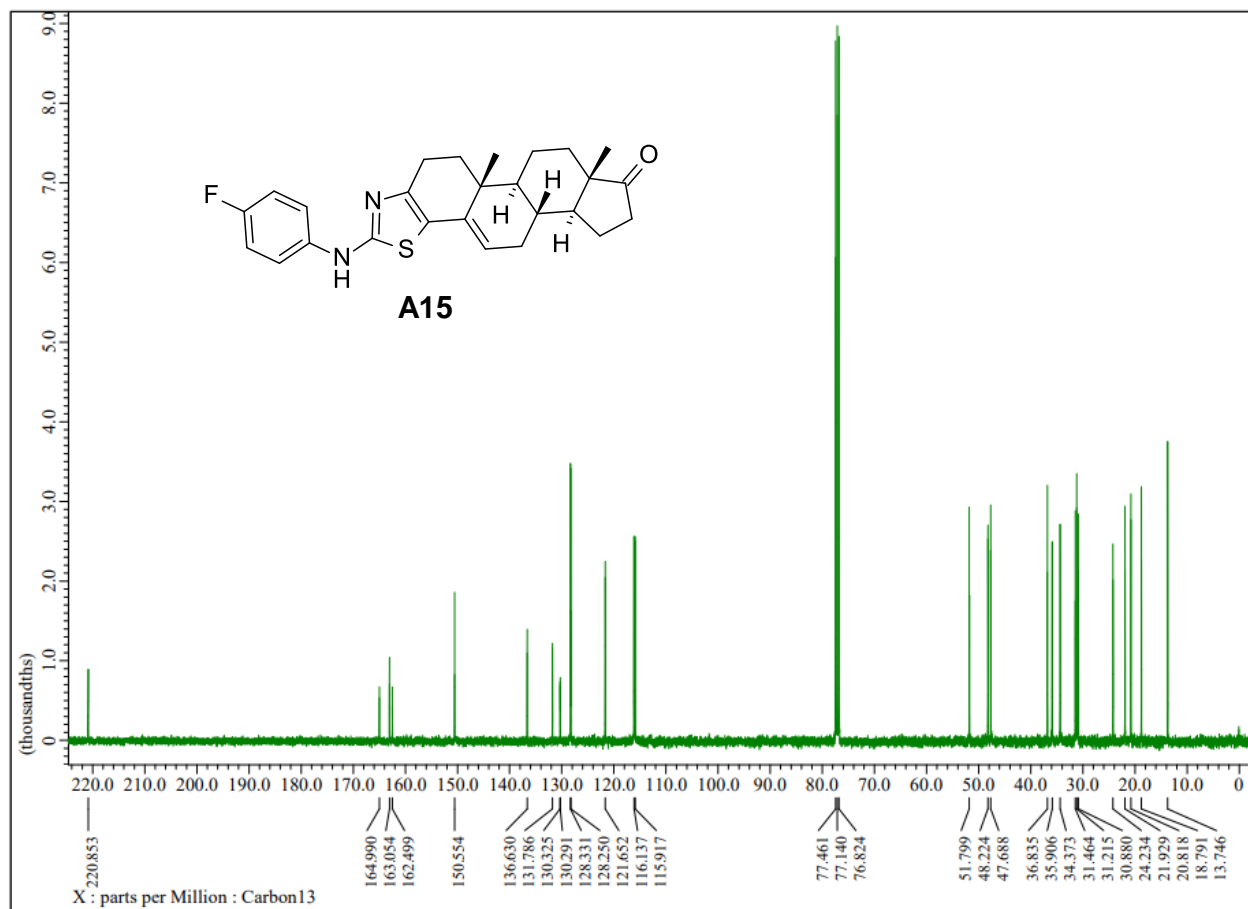

**Figure S-2:**  $^{13}\text{C}$  NMR spectrum of compound **A15** in  $\text{CDCl}_3$

Arkansas Statewide Mass Spectrometry Facility

ESI high-res Mass Spectrum

Sample Name: E-2  
 Sample id#: 5180  
 Instrument: Shimadzu IT-TOF

9/20/2023

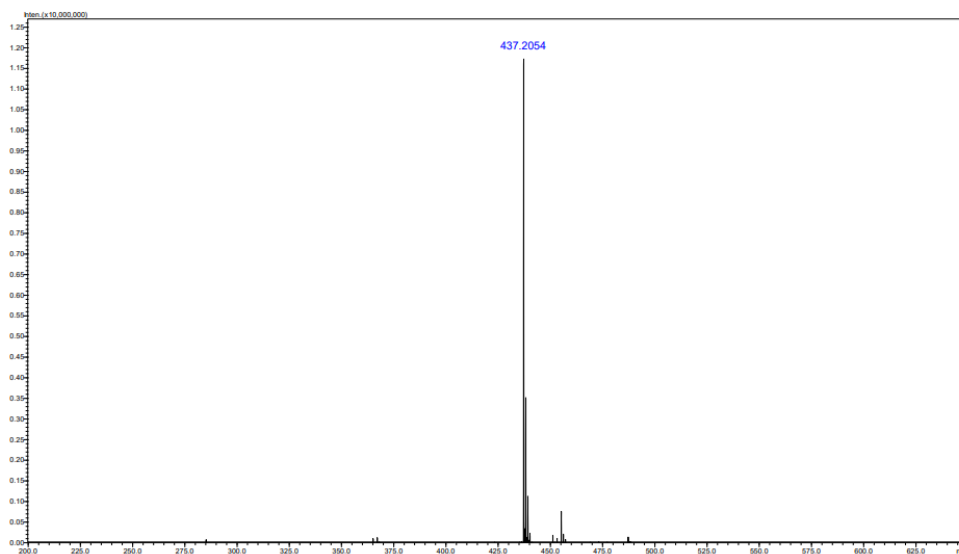

**Figure S-3:** High-resolution mass spectrum of compound **A15**

**(1*S*,2*R*,13*R*,14*S*,18*S*)-7-(3,5-Dimethylanilino)-2,18-dimethyl-8-thia-6-azapentacyclo[11.7.0.0<sup>2,10</sup>.0<sup>5,9</sup>.0<sup>14,18</sup>]icosa-5(9),6,10-trien-17-one (A21)**

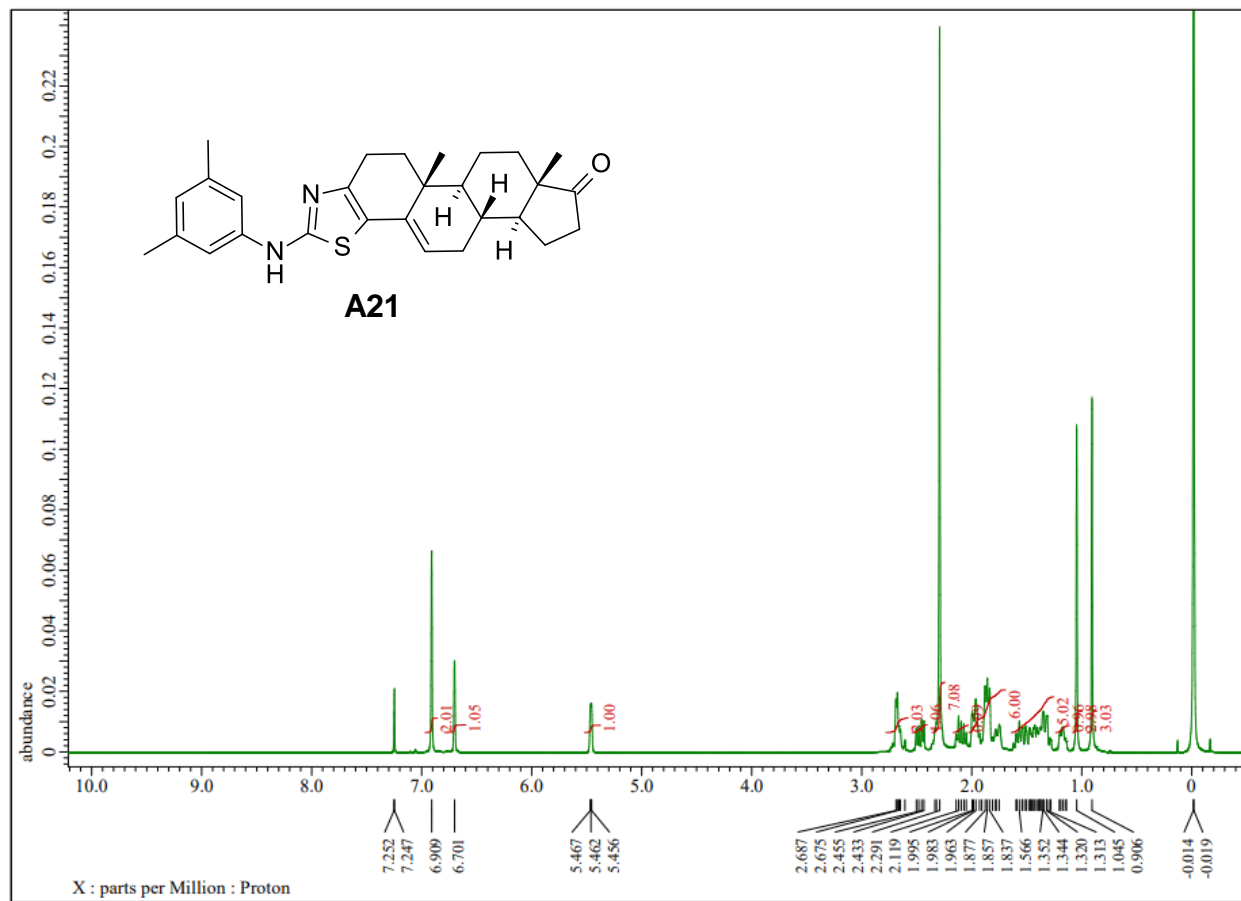

**Figure S-4:** <sup>1</sup>H NMR spectrum of compound A21 in CDCl<sub>3</sub>

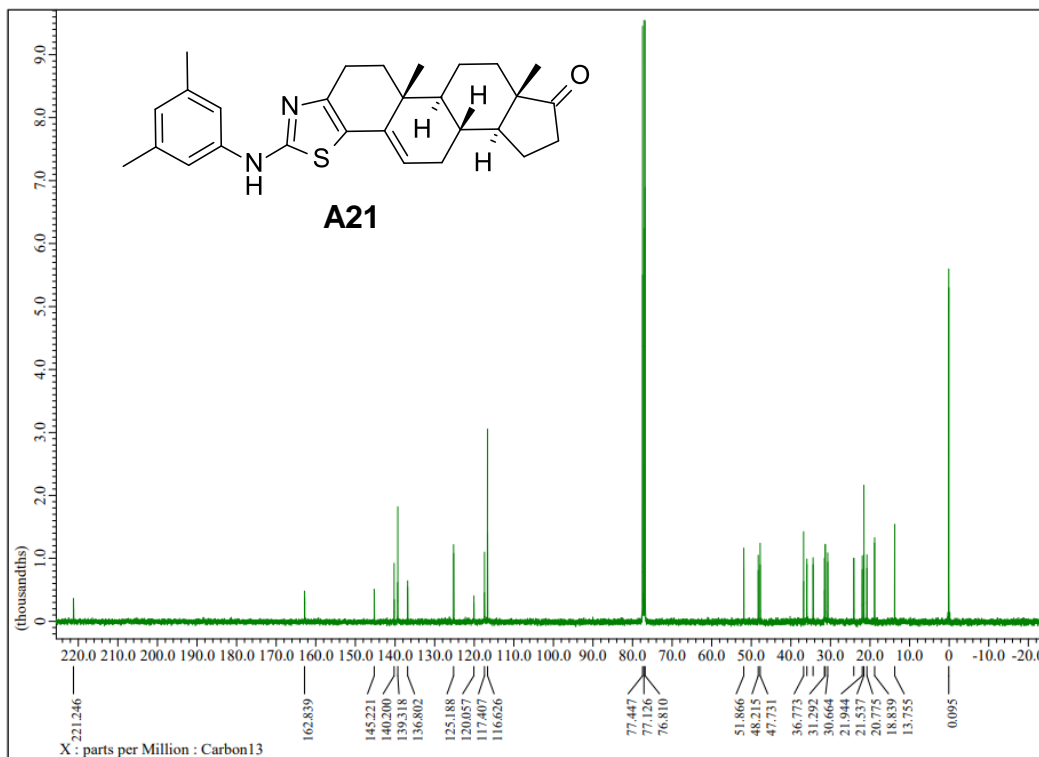

**Figure S-5:**  $^{13}\text{C}$  NMR spectrum of compound **A21** in  $\text{CDCl}_3$

Arkansas Statewide Mass Spectrometry Facility

ESI Mass Spectrum

Sample Name: A1  
 Sample id#: 5253  
 Instrument: Shimadzu IT-TOF

11/8/2023

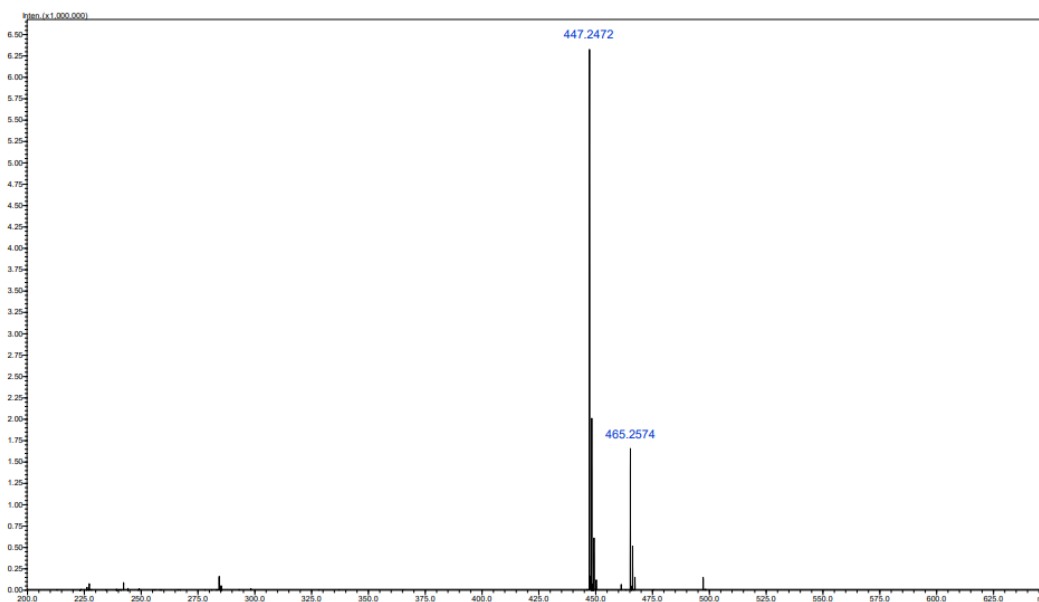

**Figure S-6:** High-resolution mass spectrum of compound **A21**

3-[[*(1S,2R,13R,14S,17R,18S)*-17-Ethynyl-17-hydroxy-2,18-dimethyl-8-thia-6-azapentacyclo[11.7.0.0<sup>2,10</sup>.0<sup>5,9</sup>.0<sup>14,18</sup>]icosa-5(9),6,10-trien-7-yl]amino]benzoic acid (**E4**)

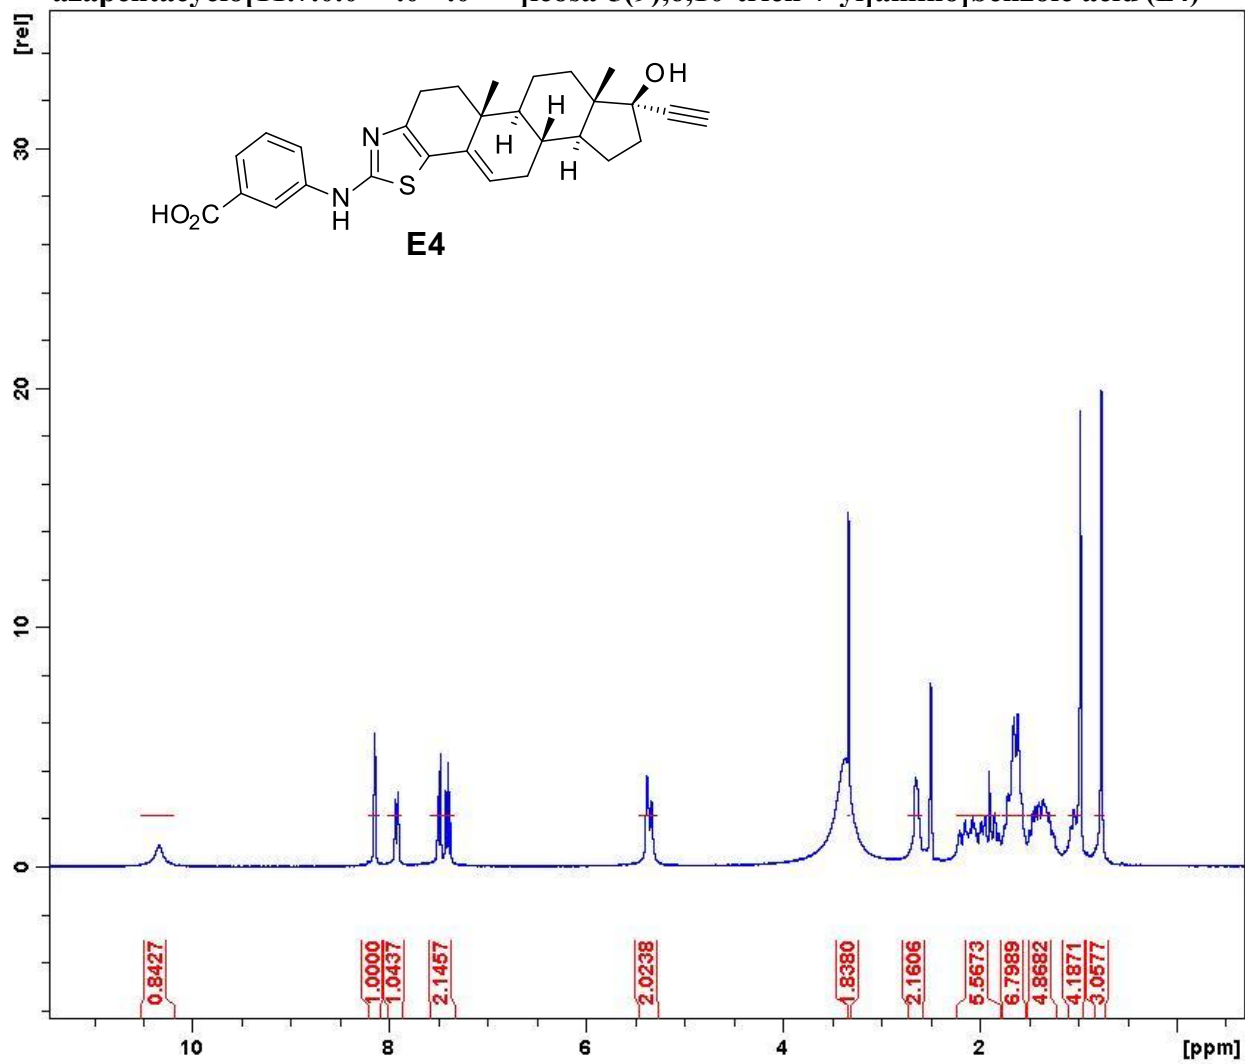

Figure S-7: <sup>1</sup>H NMR spectrum of compound **E4** in DMSO-*d*<sub>6</sub>

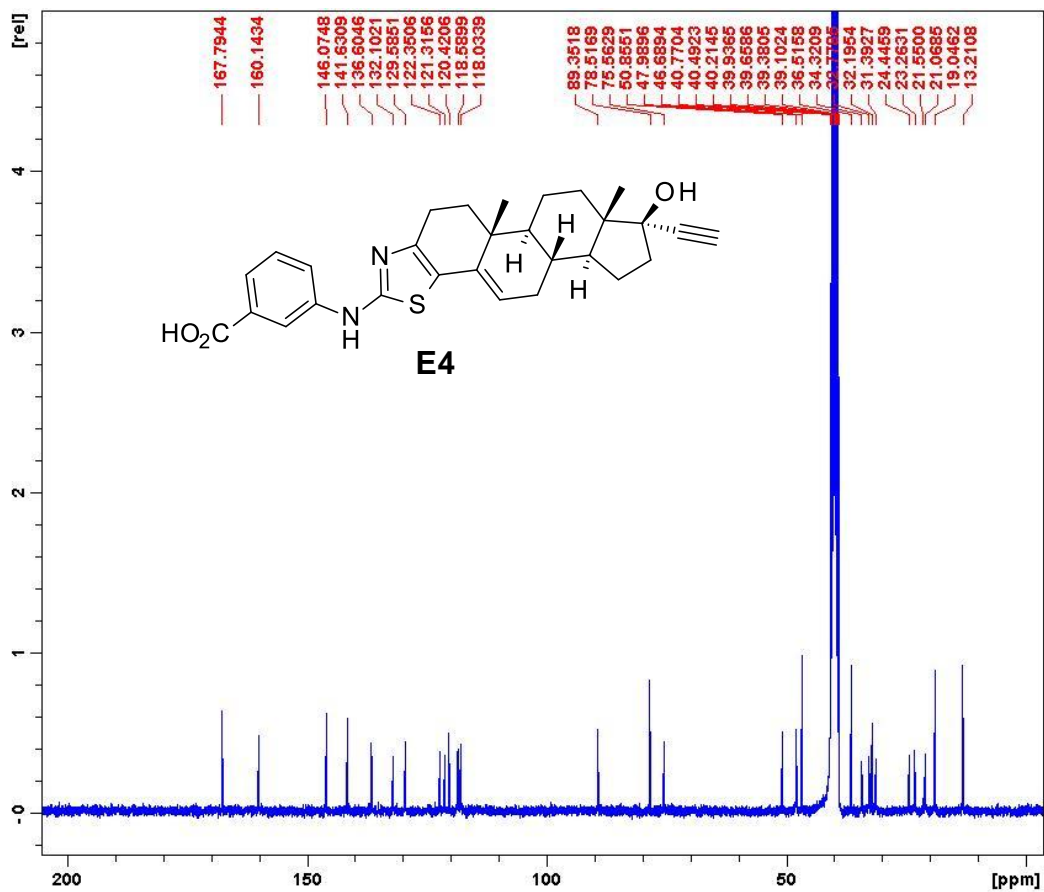

**Figure S-8:  $^{13}\text{C}$  NMR spectrum of compound E4 in DMSO- $d_6$**

Arkansas Statewide Mass Spectrometry Facility

ESI high-res Mass Spectrum

Sample Name: E-3  
 Sample id#: 5181  
 Instrument: Shimadzu IT-TOF

9/20/2023

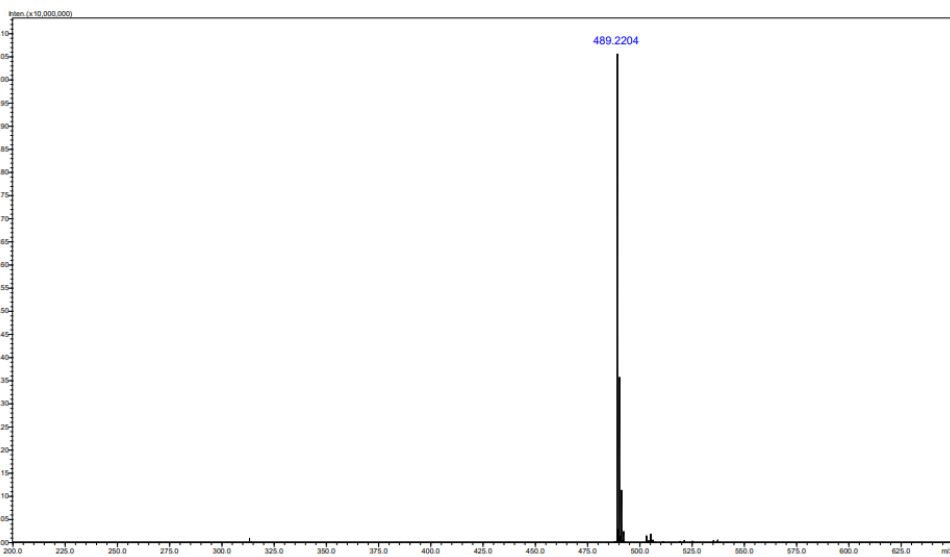

**Figure S-9: High-resolution mass spectrum of compound E4**



4-[[*(1S,2R,13R,14S,17R,18S)*-17-Ethynyl-17-hydroxy-2,18-dimethyl-8-thia-6-azapentacyclo[11.7.0.0<sup>2,10</sup>.0<sup>5,9</sup>.0<sup>14,18</sup>]icosa-5(9),6,10-trien-7-yl]amino]benzoic acid (**E5**)

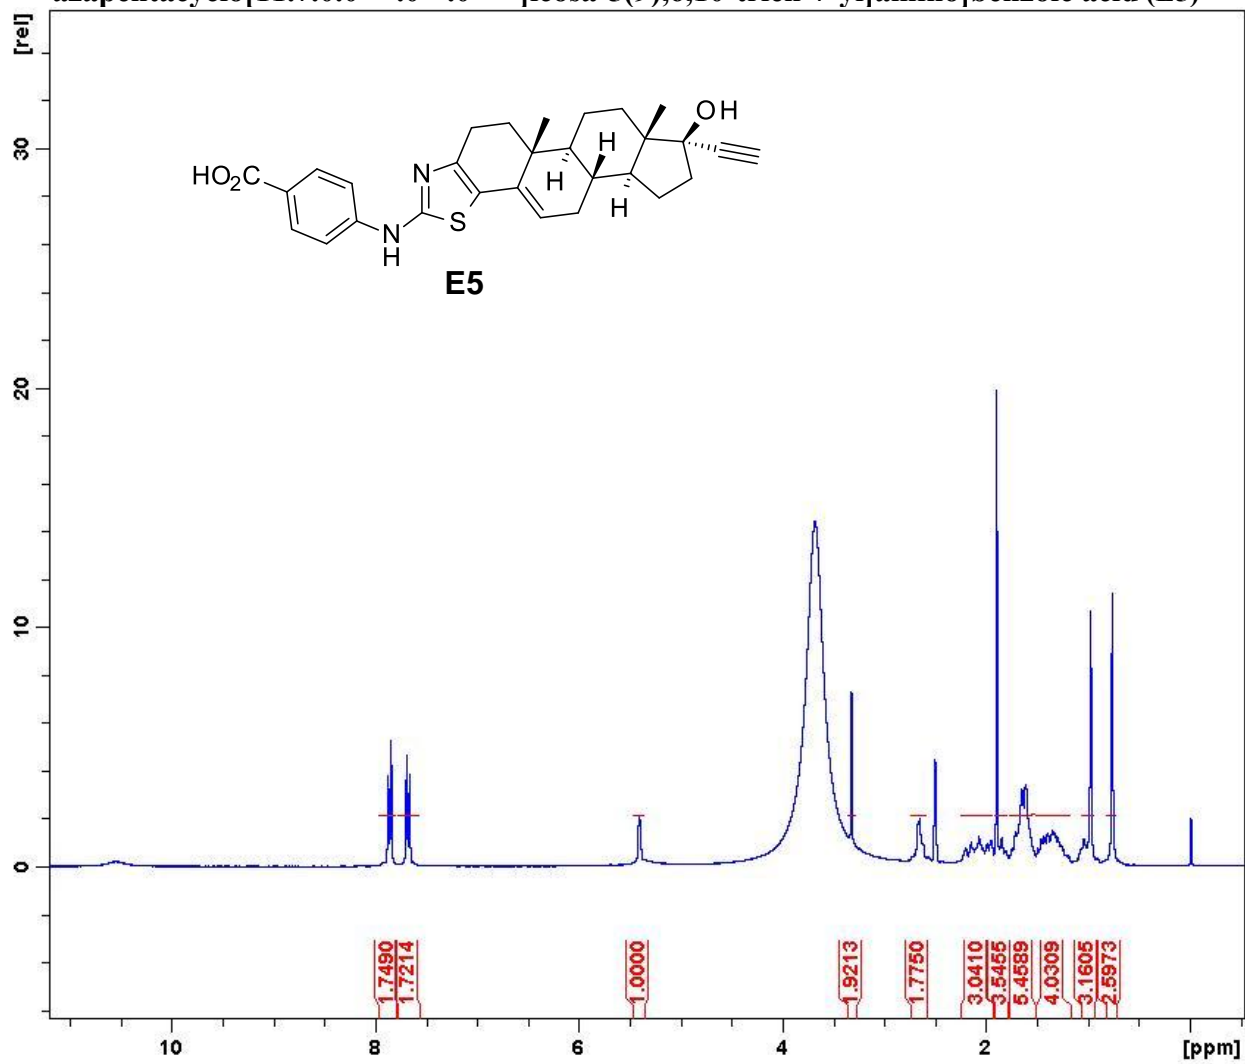

Figure S-10: <sup>1</sup>H NMR spectrum of compound **E5** in DMSO-*d*<sub>6</sub>

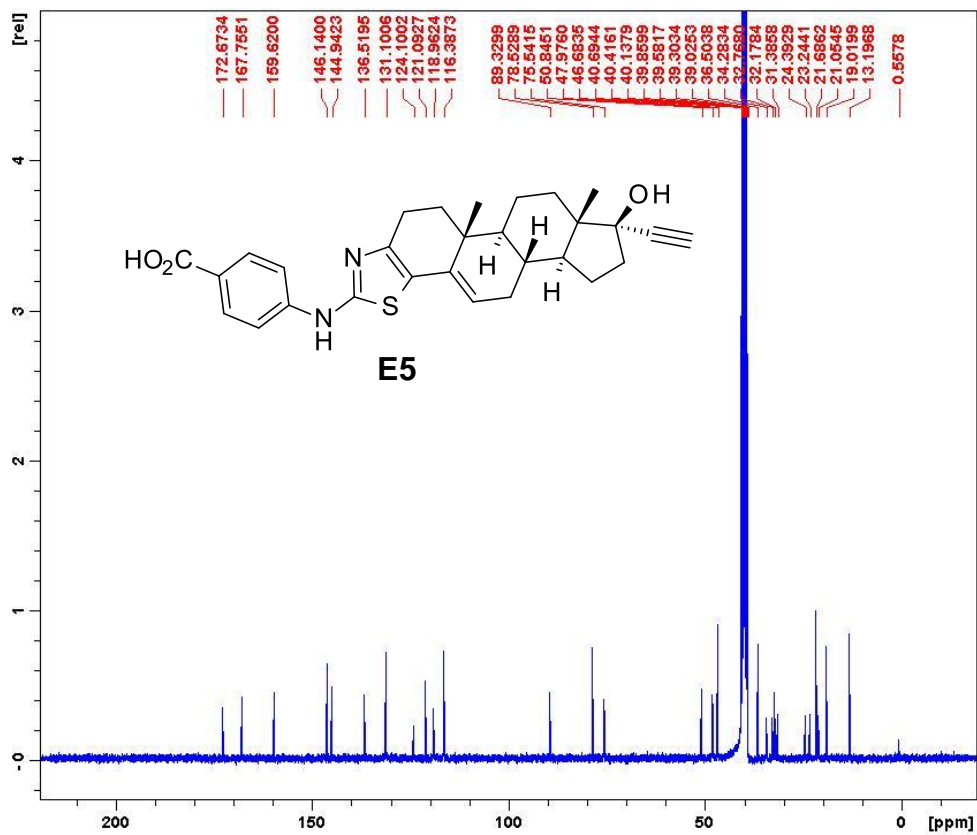

**Figure S-11:**  $^{13}\text{C}$  NMR spectrum of compound **E5** in  $\text{DMSO-}d_6$

Arkansas Statewide Mass Spectrometry Facility

ESI high-res Mass Spectrum

Sample Name: E-4  
 Sample id#: 5182  
 Instrument: Shimadzu IT-TOF

9/20/2023

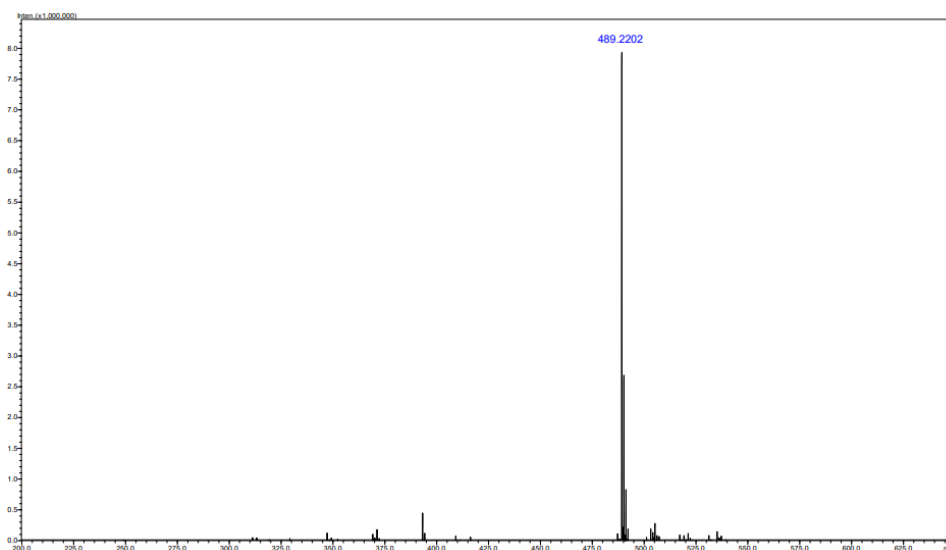

**Figure S-12:** High-resolution mass spectrum of compound **E5**

(1*S*,2*R*,13*R*,14*S*,17*R*,18*S*)-7-(3,5-Dimethylanilino)-17-ethynyl-2,18-dimethyl-8-thia-6-azapentacyclo[11.7.0.0<sup>2,10</sup>.0<sup>5,9</sup>.0<sup>14,18</sup>]icosa-5(9),6,10-trien-17-ol (E7)

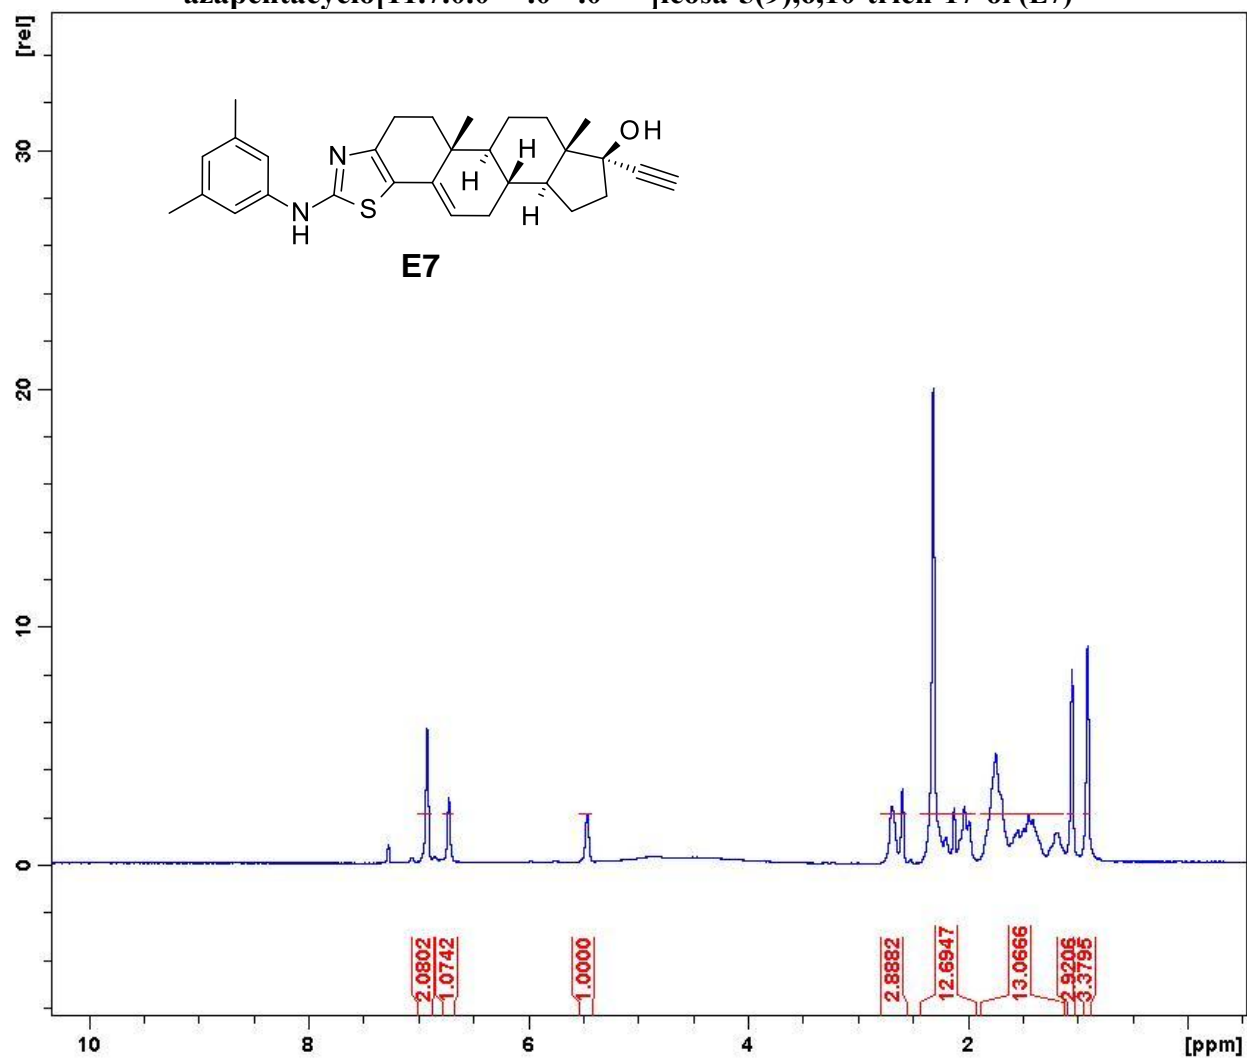

Figure S-13: <sup>1</sup>H NMR spectrum of compound E7 in CDCl<sub>3</sub>

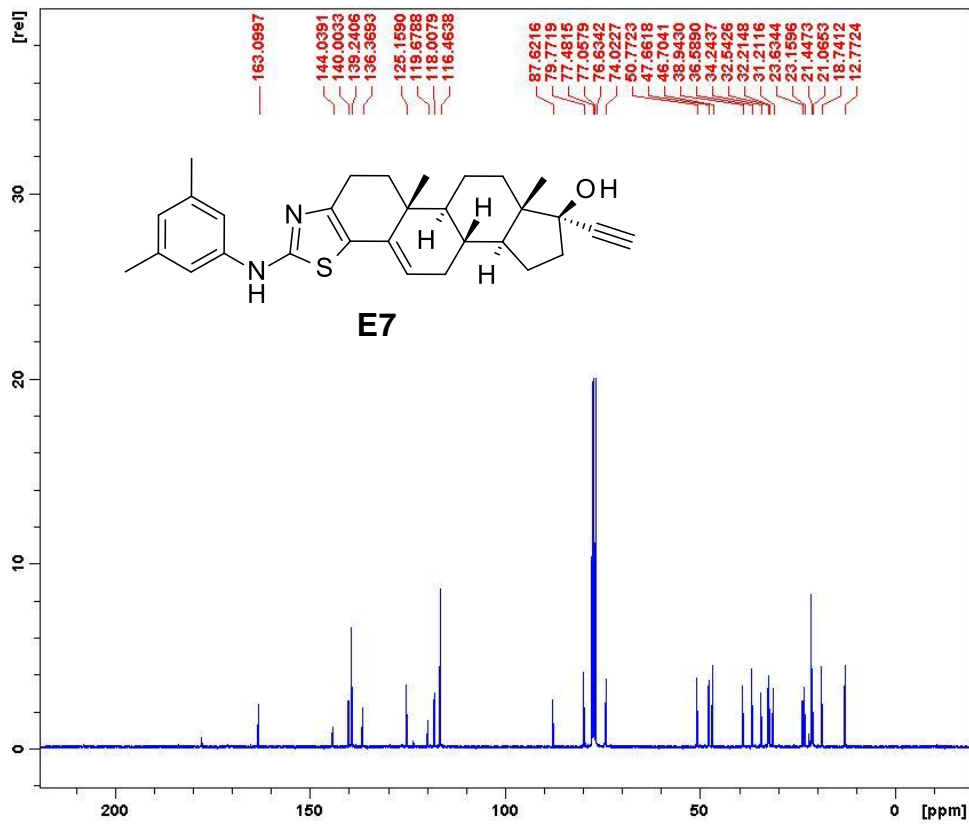

Figure S-14:  $^{13}\text{C}$  NMR spectrum of compound E7 in  $\text{CDCl}_3$

Arkansas Statewide Mass Spectrometry Facility

ESI high-res Mass Spectrum

Sample Name: E-5  
 Sample id#: 5183  
 Instrument: Shimadzu IT-TOF

9/20/2023

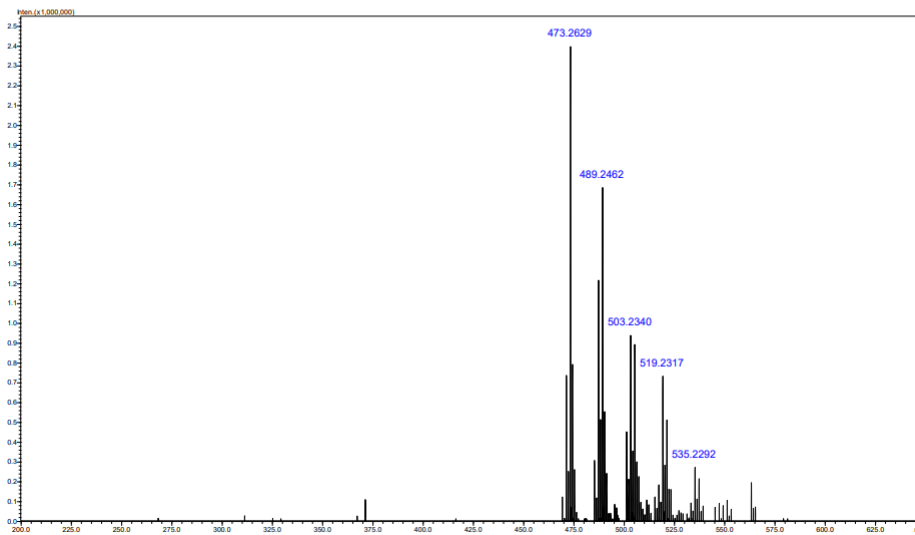

Figure S-15: High-resolution mass spectrum of compound E7

(1*S*,2*R*,13*R*,14*S*,17*R*,18*S*)-7-(3-Chloro-4-methyl-anilino)-17-ethynyl-2,18-dimethyl-8-thia-6-azapentacyclo[11.7.0.0<sup>2,10</sup>.0<sup>5,9</sup>.0<sup>14,18</sup>]icosa-5(9),6,10-trien-17-ol (E11)

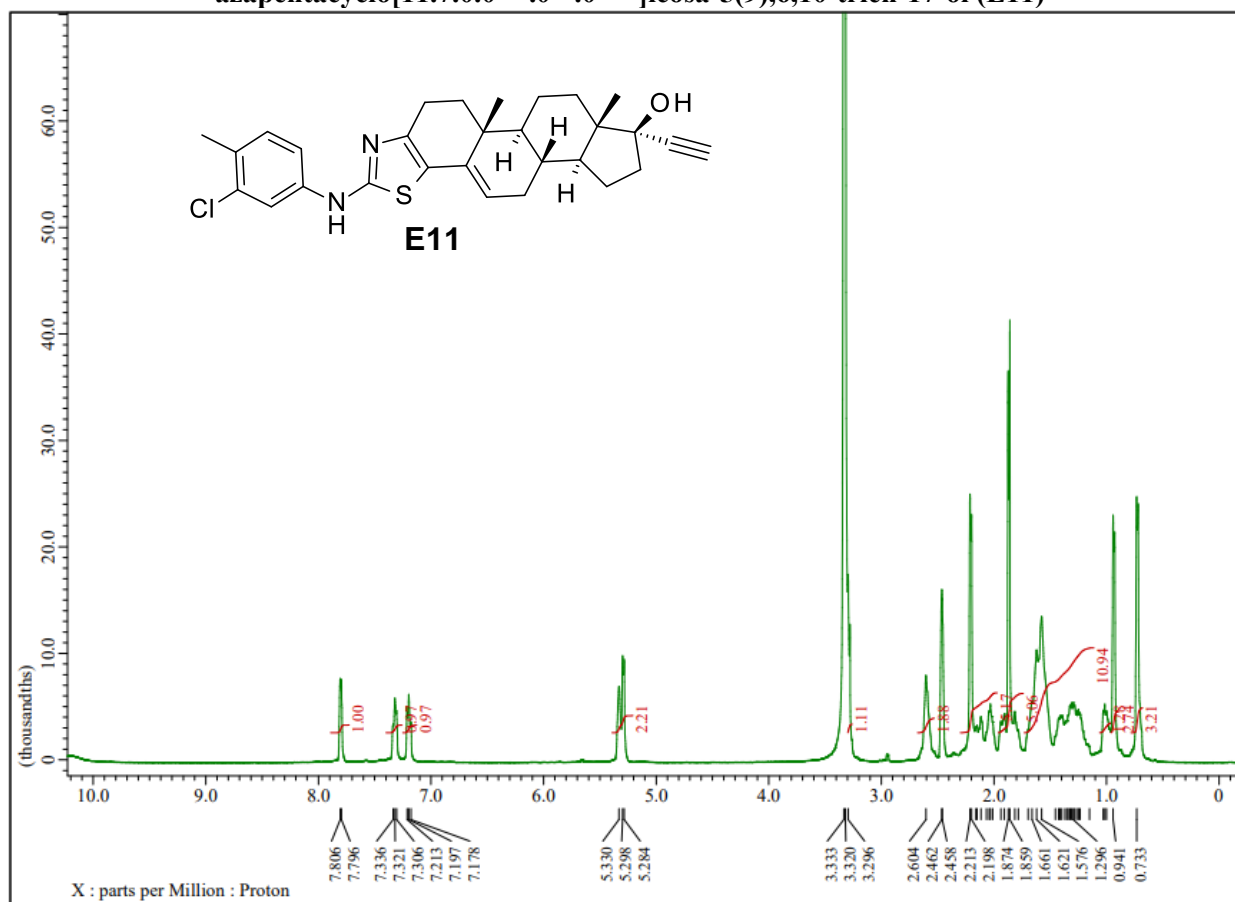

Figure S-16: <sup>1</sup>H NMR spectrum of compound E11 in DMSO-*d*<sub>6</sub>

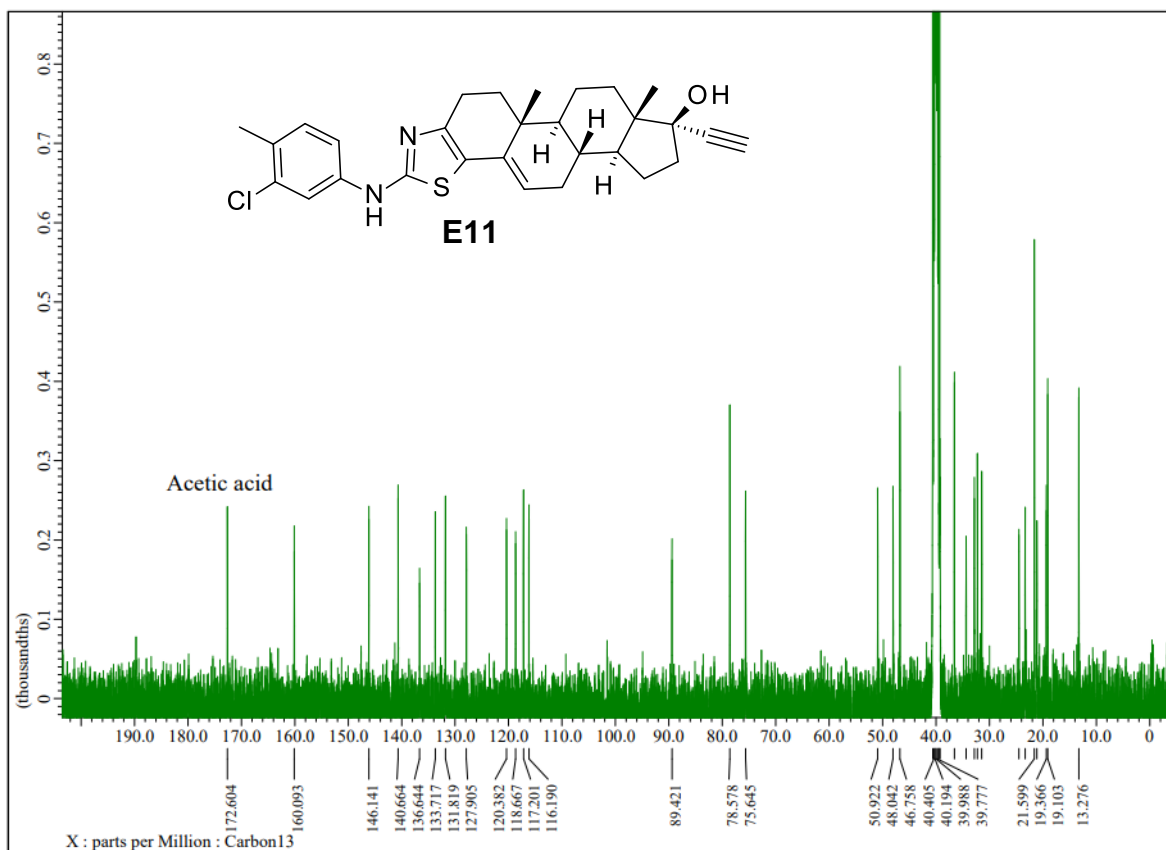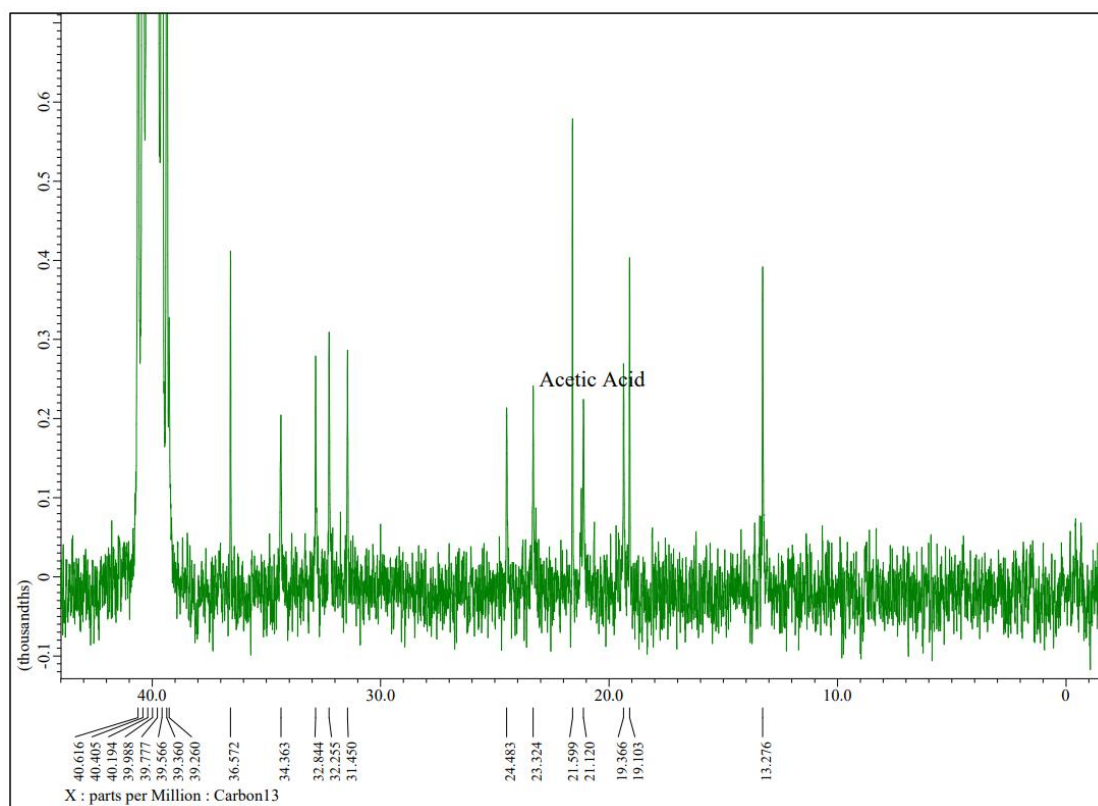

**Figure S-17:**  $^{13}\text{C}$  NMR spectrum of compound **E11** in  $\text{DMSO-}d_6$

Arkansas Statewide Mass Spectrometry Facility

ESI high-res Mass Spectrum

Sample Name: E-3Cl-4Me  
Sample id#: 4306  
Instrument: Shimadzu IT-TOF

8/27/2021

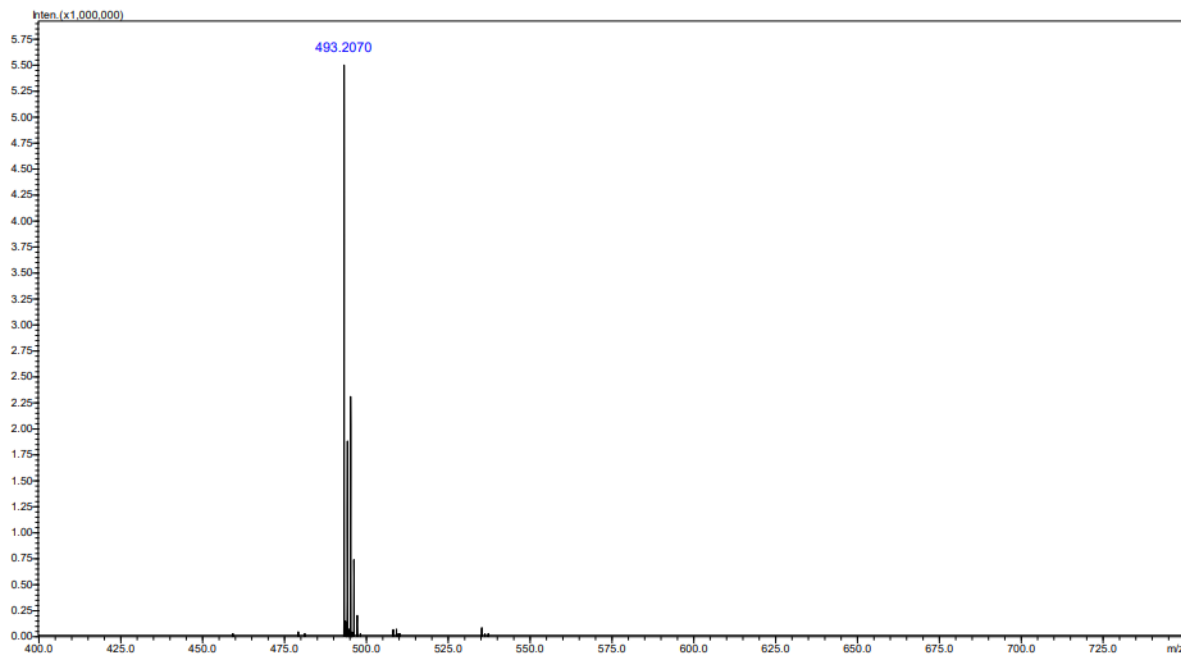

Arkansas Statewide Mass Spectrometry Facility

ESI high-res Mass Spectrum

Sample Name: E-3Cl-4Me  
Sample id#: 4306  
Instrument: Shimadzu IT-TOF

8/27/2021

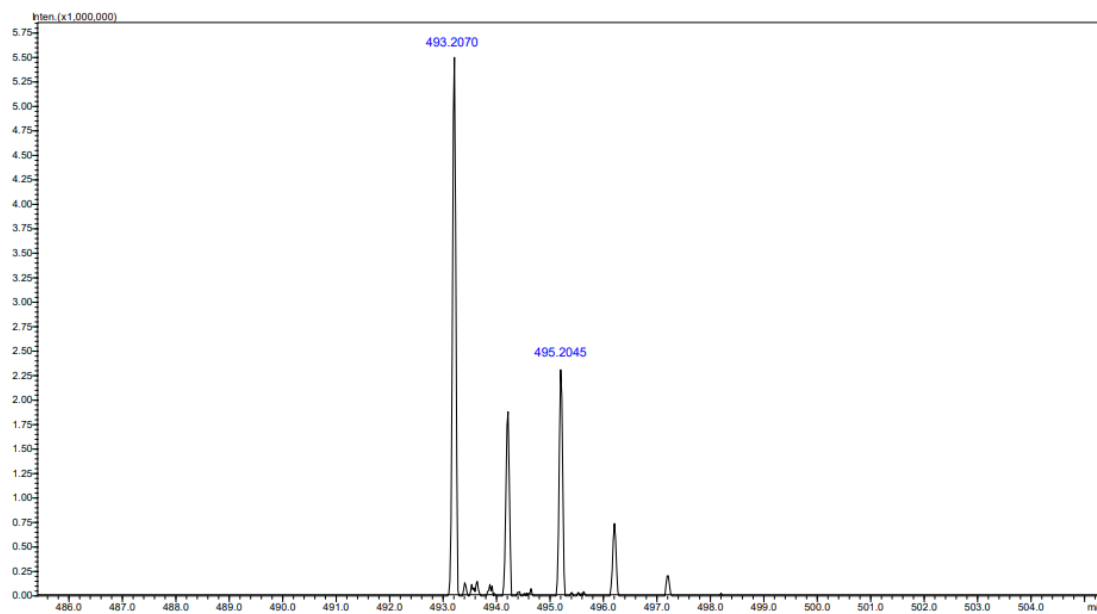

Figure S-18: High-resolution mass spectrum of compound E11

(1*S*,2*R*,13*R*,14*S*,17*R*,18*S*)-17-Ethynyl-2,18-dimethyl-7-(*N*-methylanilino)-8-thia-6-azapentacyclo[11.7.0.0<sup>2,10</sup>.0<sup>5,9</sup>.0<sup>14,18</sup>]jicosa-5(9),6,10-trien-17-ol (E13)

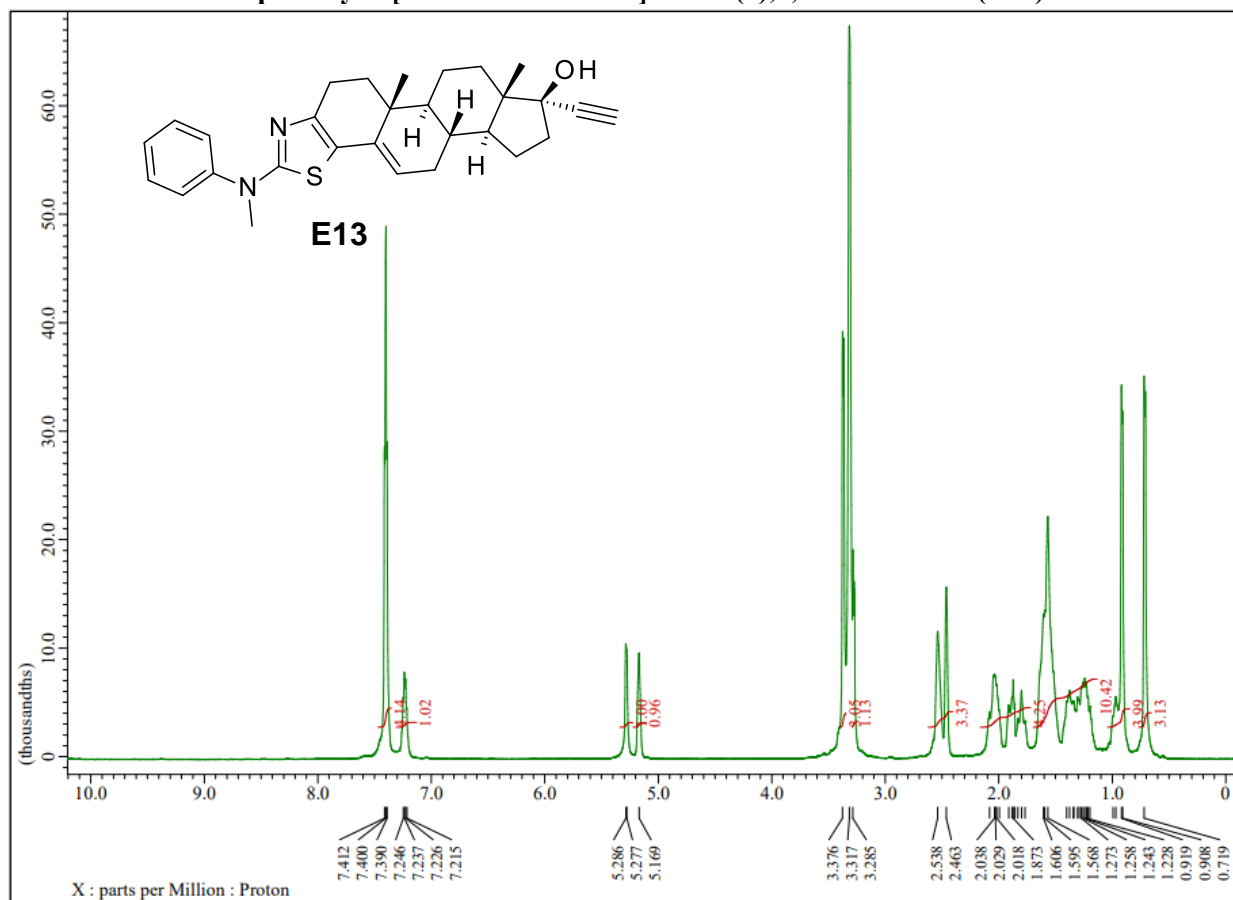

Figure S-19: <sup>1</sup>H NMR spectrum of compound E13 in DMSO-*d*<sub>6</sub>



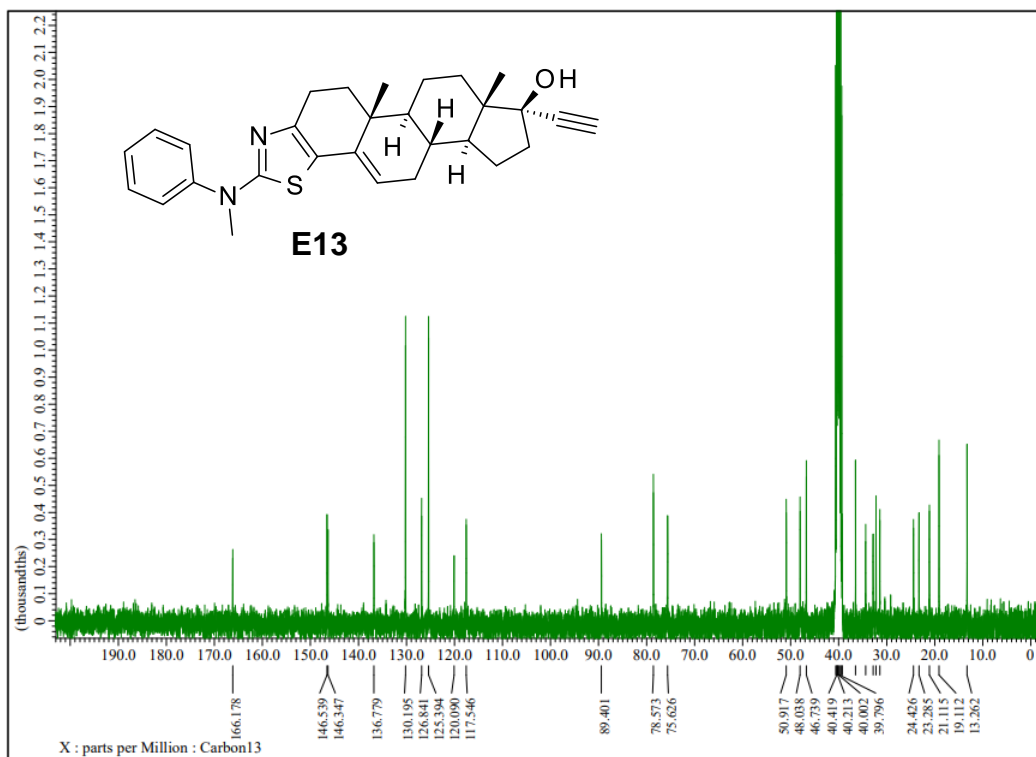

**Figure S-20:**  $^{13}\text{C}$  NMR spectrum of compound **E13** in  $\text{DMSO-}d_6$

Arkansas Statewide Mass Spectrometry Facility

ESI high-res Mass Spectrum

Sample Name: E-7  
 Sample id#: 5185  
 Instrument: Shimadzu IT-TOF

9/20/2023

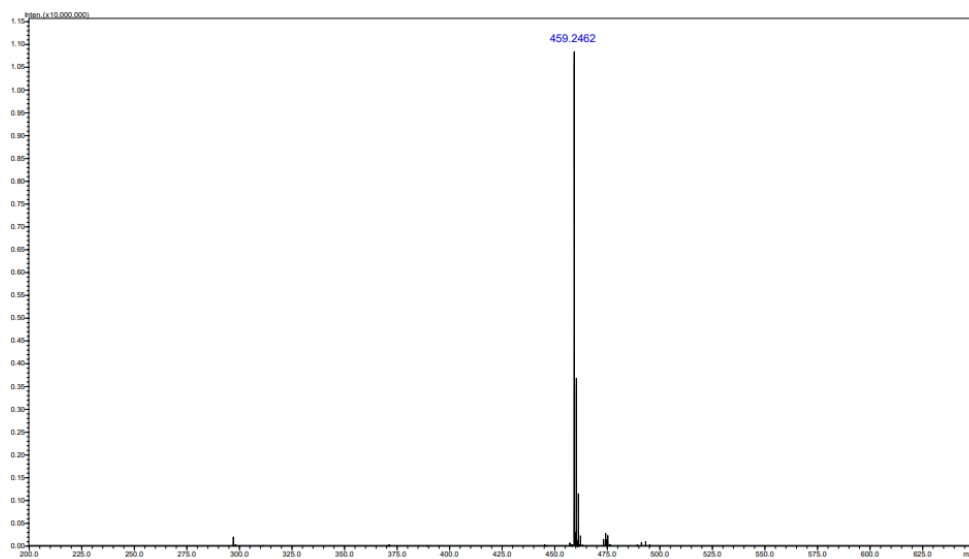

**Figure S-21:** High-resolution mass spectrum of compound **E13**



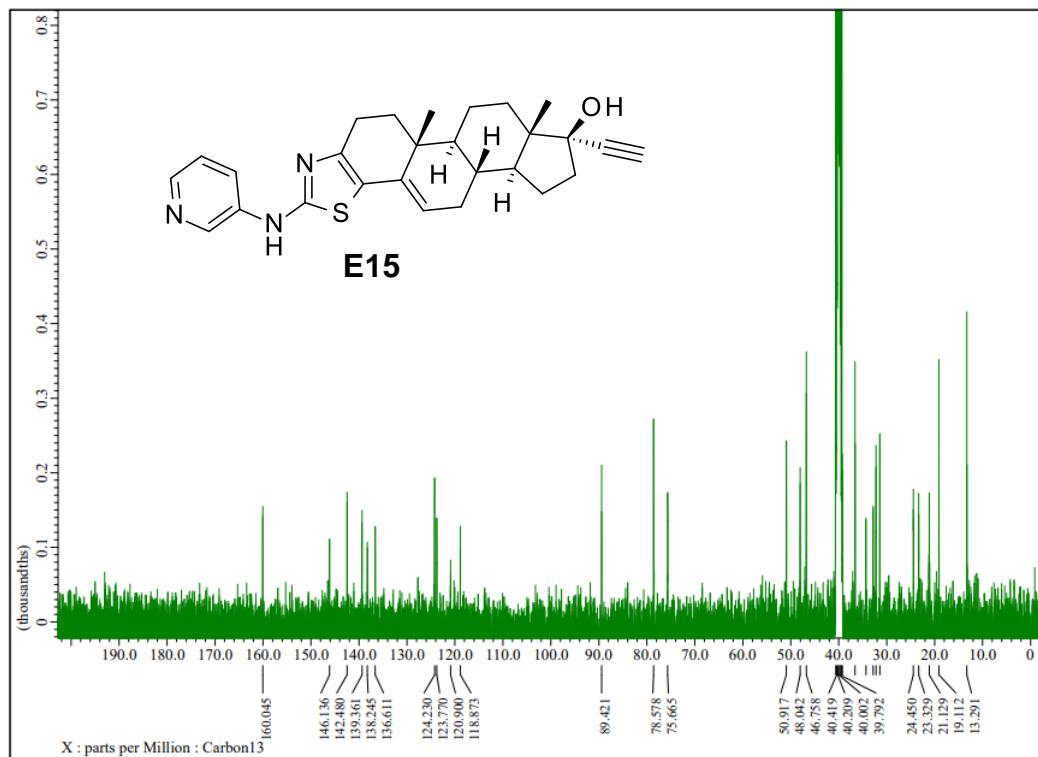

**Figure S-23:**  $^{13}\text{C}$  NMR spectrum of compound **E15** in  $\text{DMSO-}d_6$

Arkansas Statewide Mass Spectrometry Facility

ESI high-res Mass Spectrum

Sample Name: E-8

Sample id#: 5186

Instrument: Shimadzu IT-TOF

9/20/2023

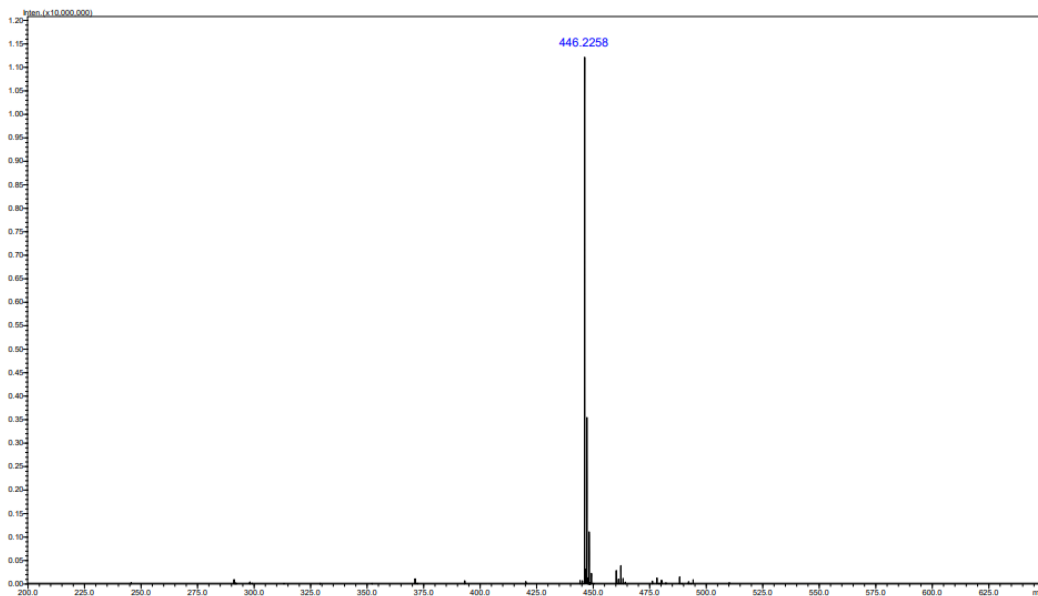

**Figure S-24:** High-resolution mass spectrum of compound **E15**



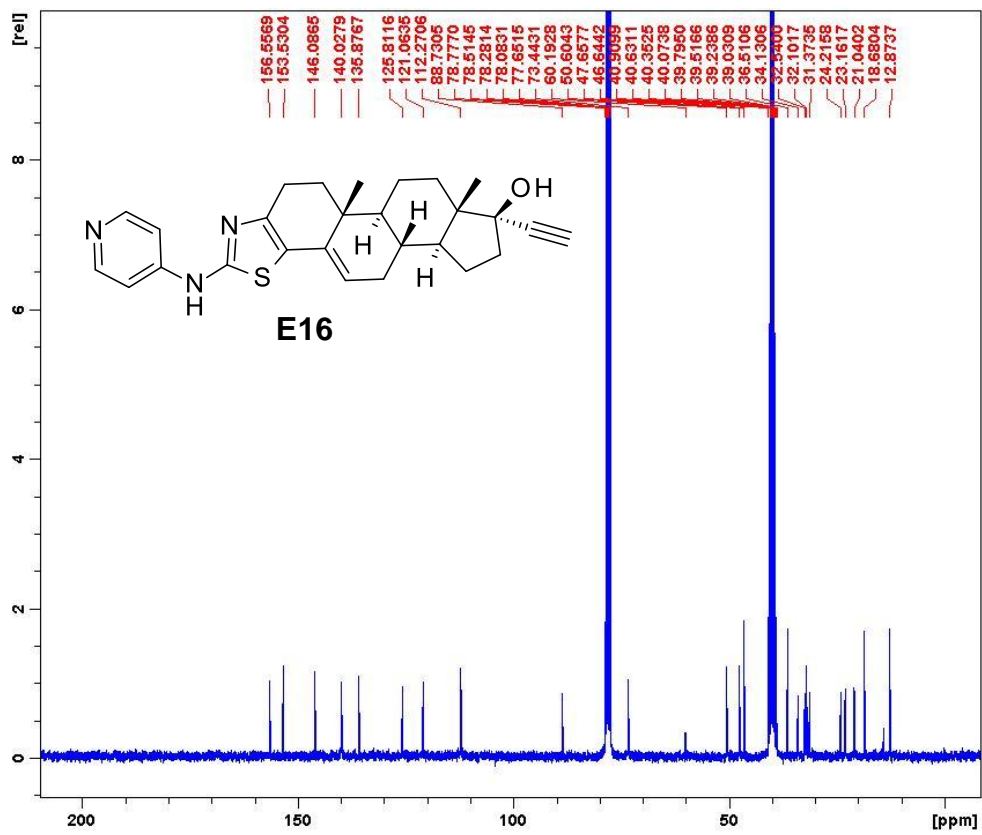

Figure S-26: <sup>13</sup>C NMR spectrum of compound E16 in DMSO-*d*<sub>6</sub> and CDCl<sub>3</sub>

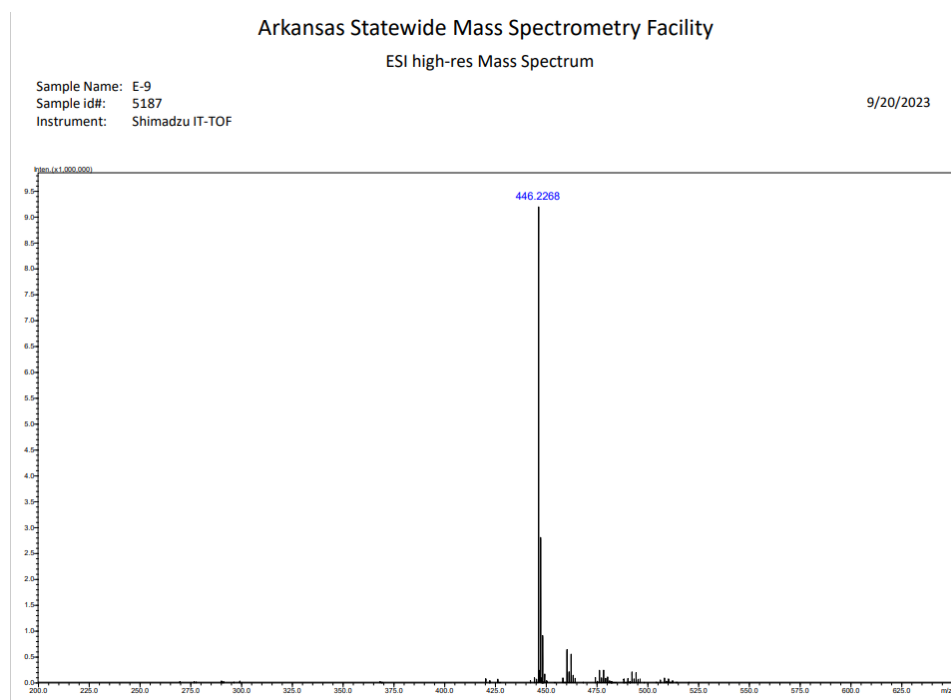

Figure S-27: High-resolution mass spectrum of compound E16

(1*S*,2*R*,13*R*,14*S*,17*R*,18*E*)-17-Ethynyl-2,18-dimethyl-7-[(3-methyl-2-pyridyl)amino]-8-thia-6-azapentacyclo[11.7.0.0<sup>2,10</sup>.0<sup>5,9</sup>.0<sup>14,18</sup>]icosa-5(9),6,10-trien-17-ol (E17)

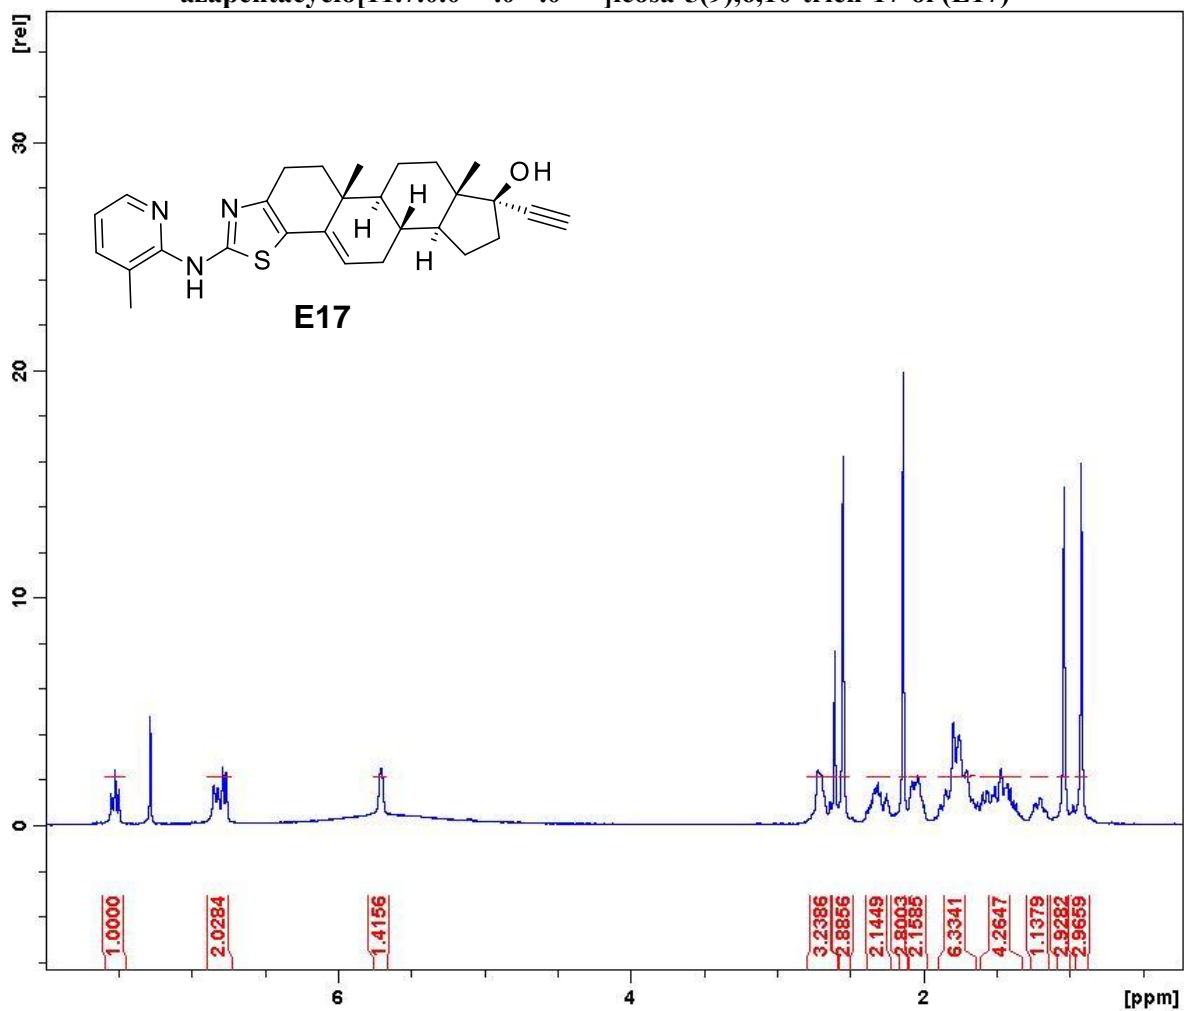

Figure S-28: <sup>1</sup>H NMR spectrum of compound E17 in CDCl<sub>3</sub>

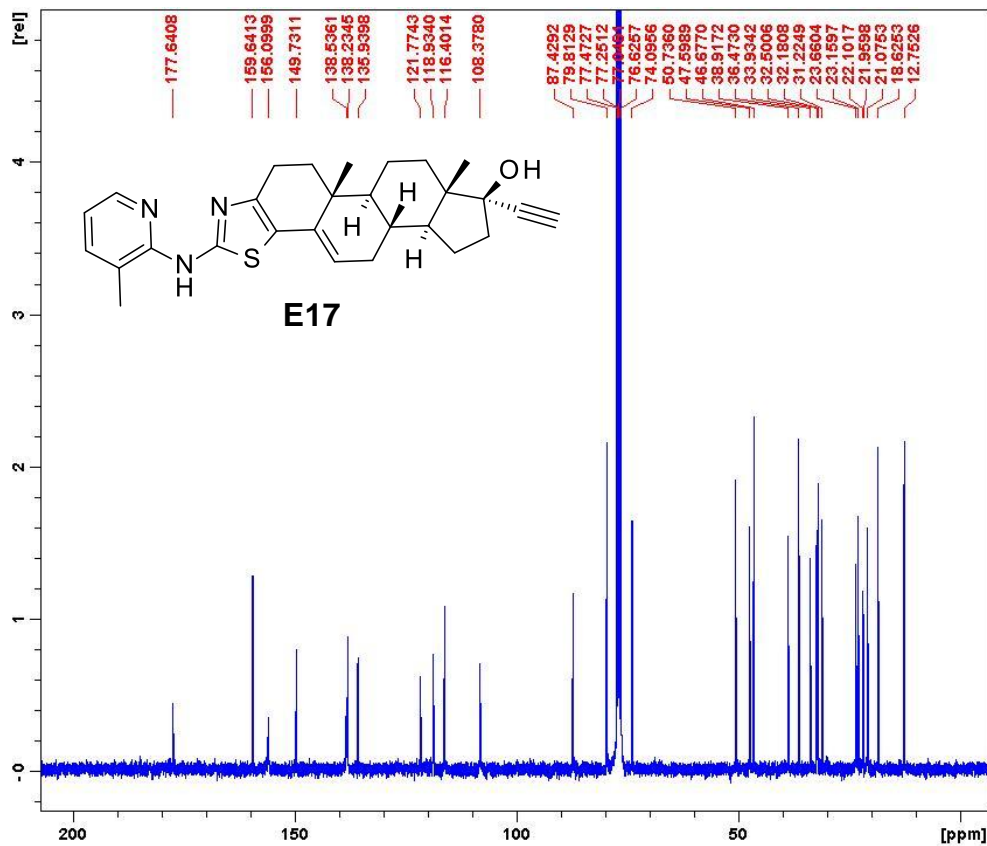

Figure S-29:  $^{13}\text{C}$  NMR spectrum of compound **E17** in  $\text{CDCl}_3$

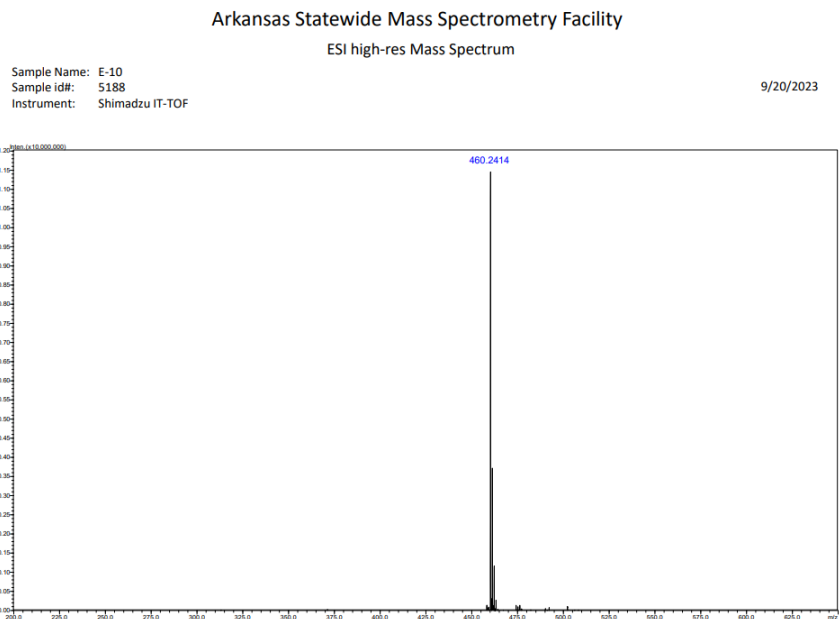

Figure S-30: High-resolution mass spectrum of compound **E17**

(1*S*,2*R*,13*R*,14*S*,17*R*,18*S*)-17-Ethynyl-2,18-dimethyl-7-[(5-methyl-2-pyridyl)amino]-8-thia-6-azapentacyclo[11.7.0.0<sup>2,10</sup>.0<sup>5,9</sup>.0<sup>14,18</sup>]icosa-5(9),6,10-trien-17-ol (E18)

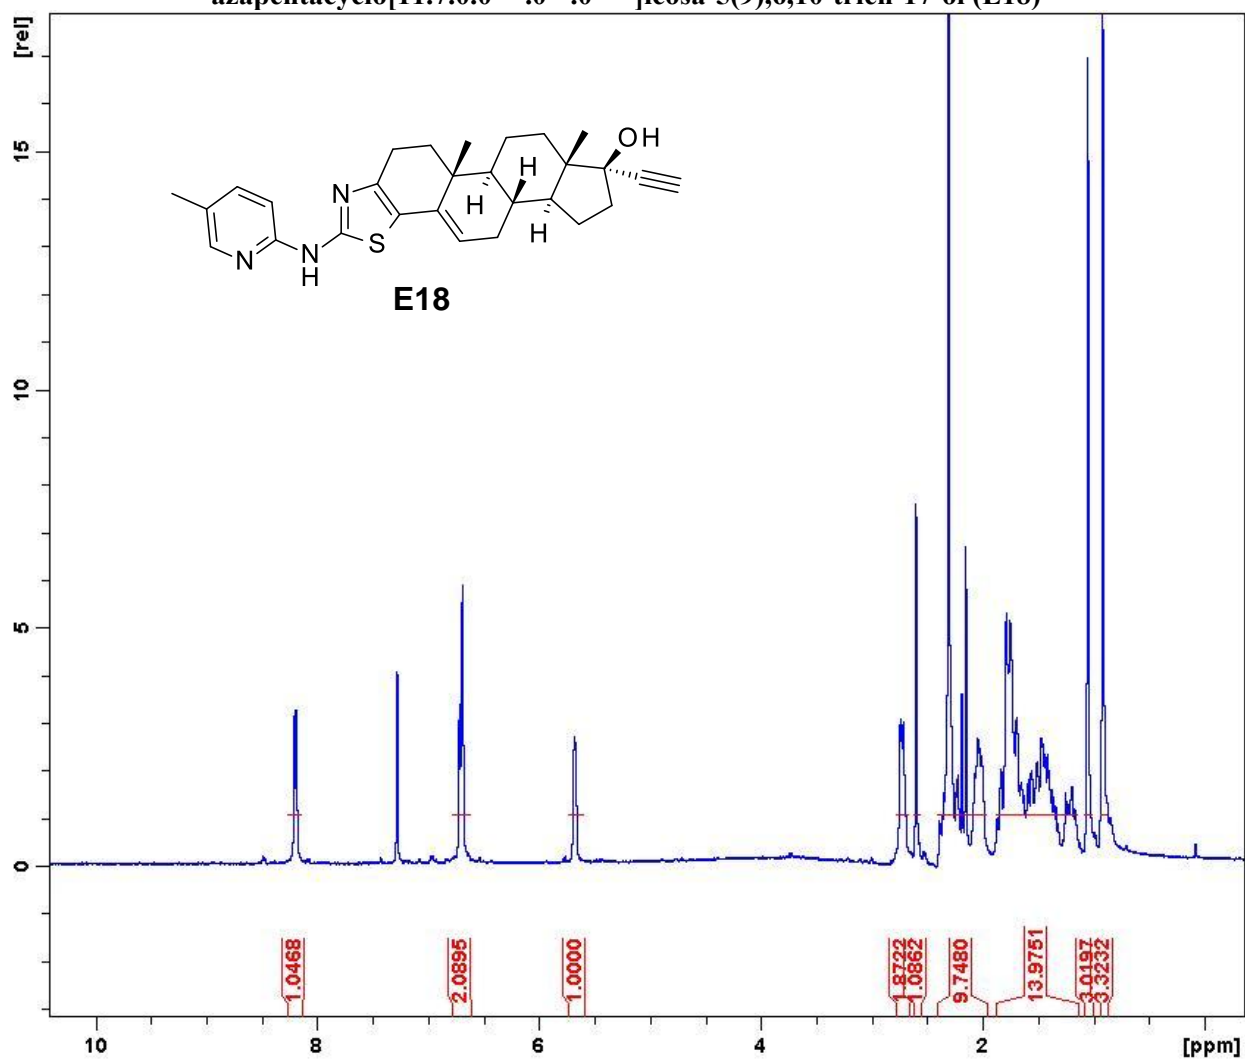

Figure S-31: <sup>1</sup>H NMR spectrum of compound E18 in CDCl<sub>3</sub>



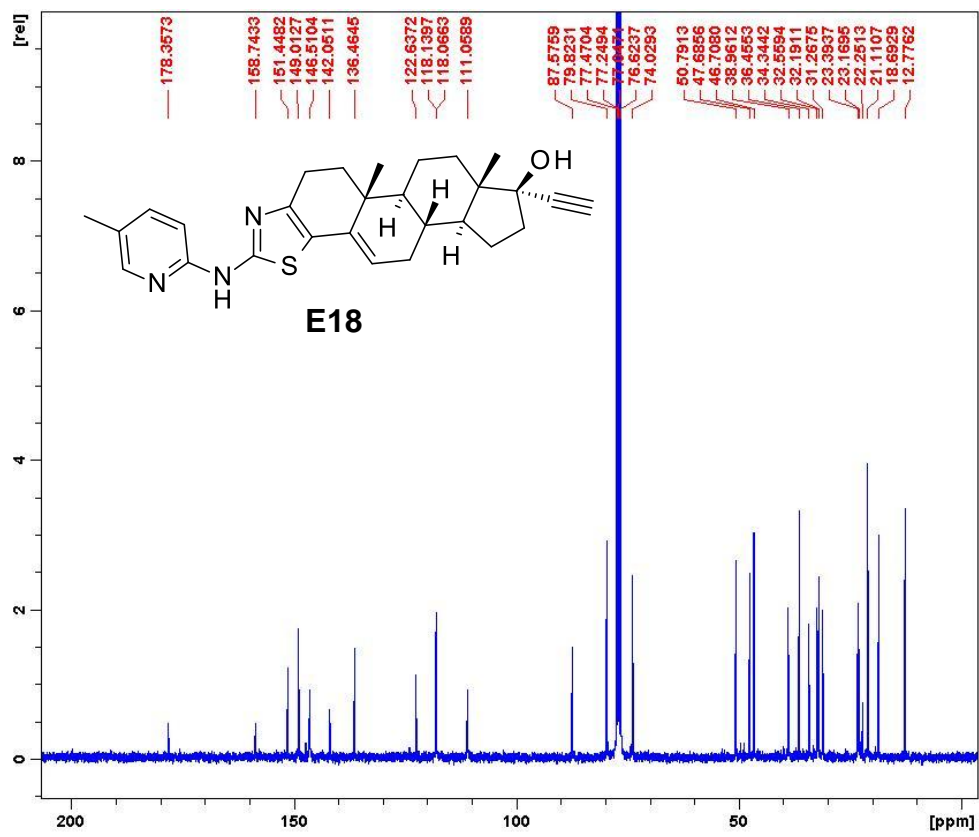

**Figure S-32:**  $^{13}\text{C}$  NMR spectrum of compound **E18** in  $\text{CDCl}_3$

Arkansas Statewide Mass Spectrometry Facility

ESI high-res Mass Spectrum

Sample Name: E-11  
 Sample id#: 5189  
 Instrument: Shimadzu IT-TOF

9/20/2023

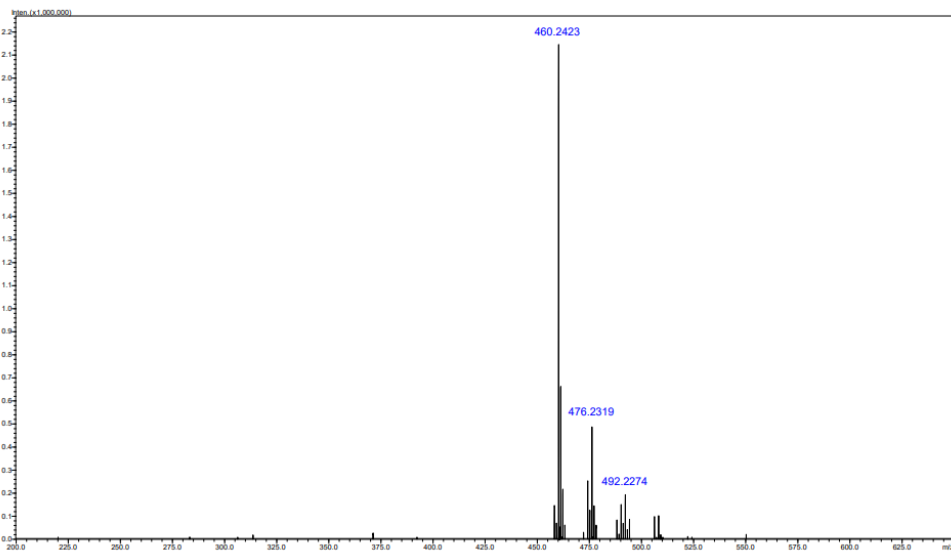

**Figure S-33:** High-resolution mass spectrum of compound **E18**

(1*S*,2*R*,13*R*,14*S*,17*R*,18*S*)-17-Ethynyl-2,18-dimethyl-7-[(6-methyl-2-pyridyl)amino]-8-thia-6-azapentacyclo[11.7.0.0<sup>2,10</sup>.0<sup>5,9</sup>.0<sup>14,18</sup>]icosa-5(9),6,10-trien-17-ol (E19)

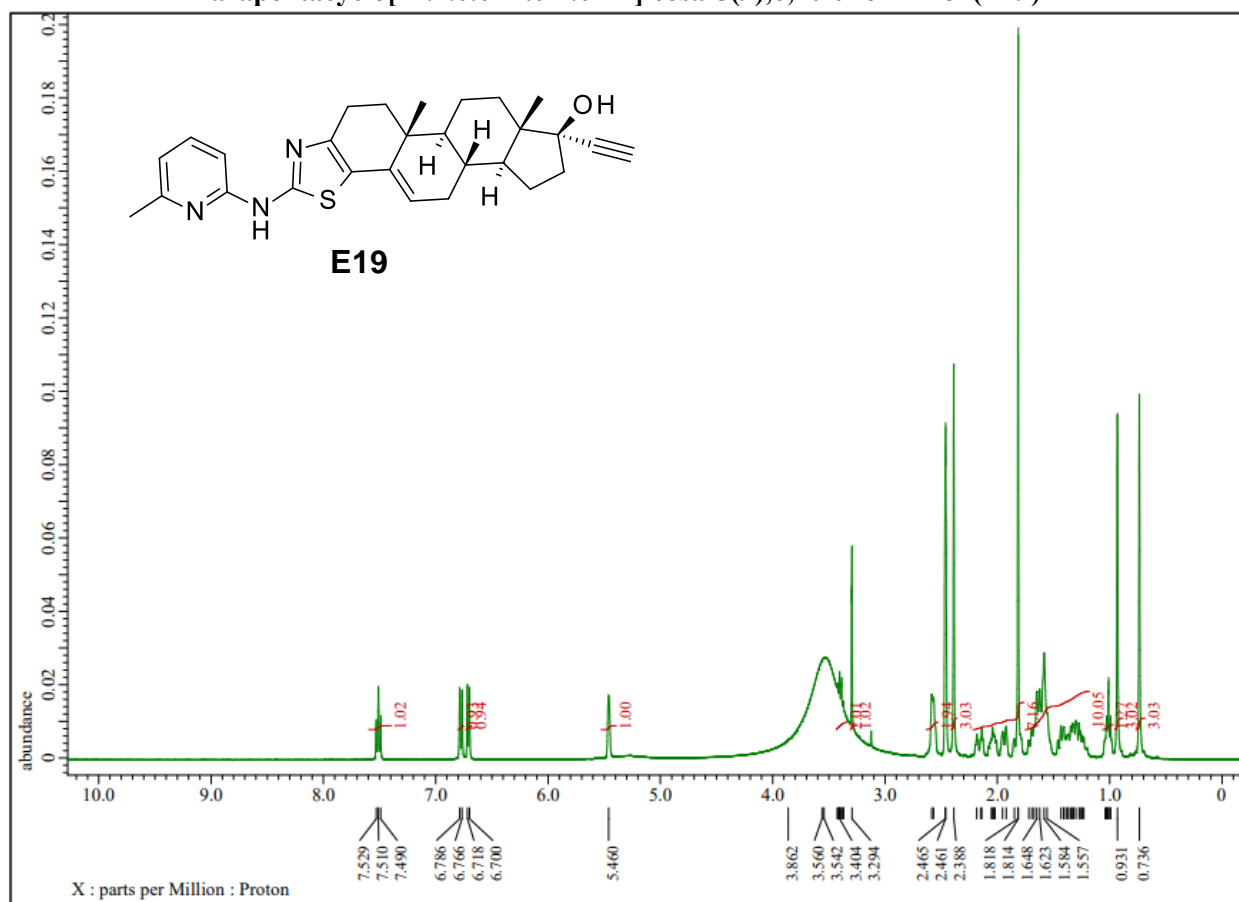

**Figure S-34:** <sup>1</sup>H NMR spectrum of compound **E19** in DMSO-*d*<sub>6</sub>

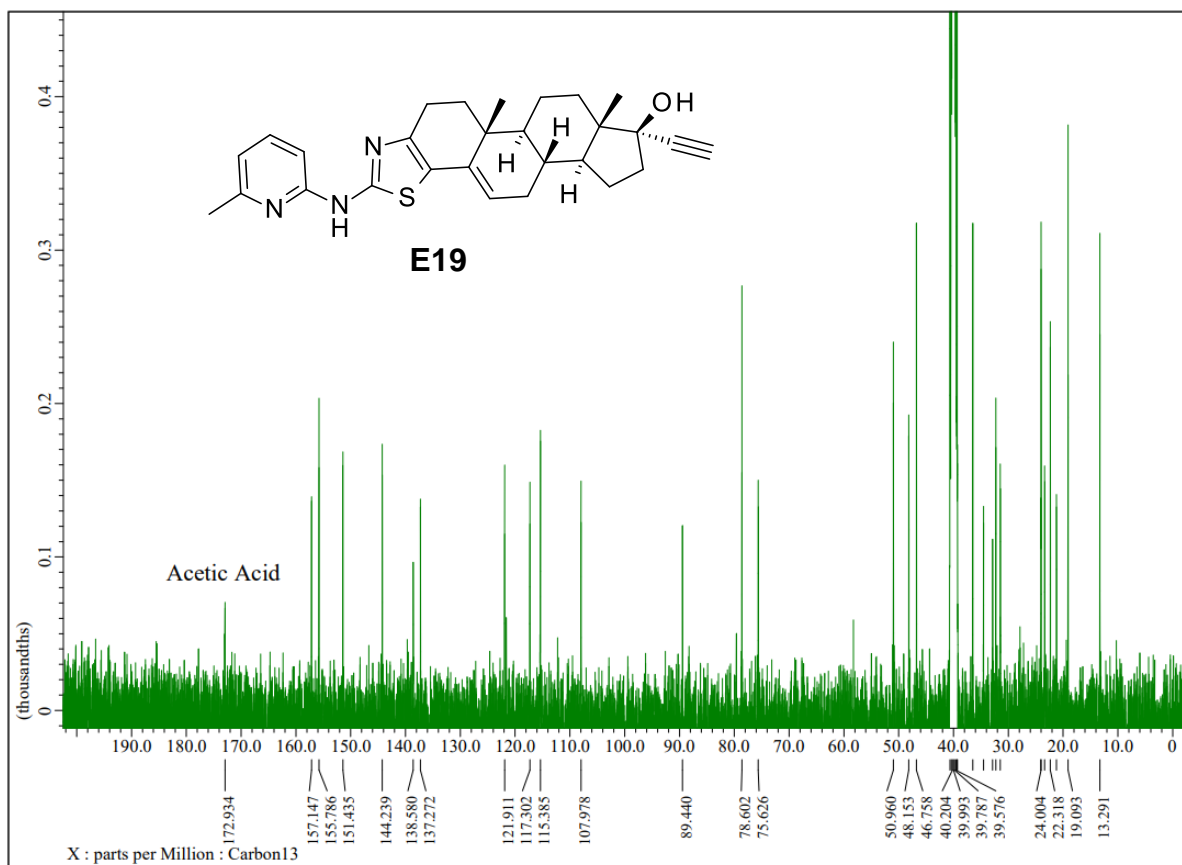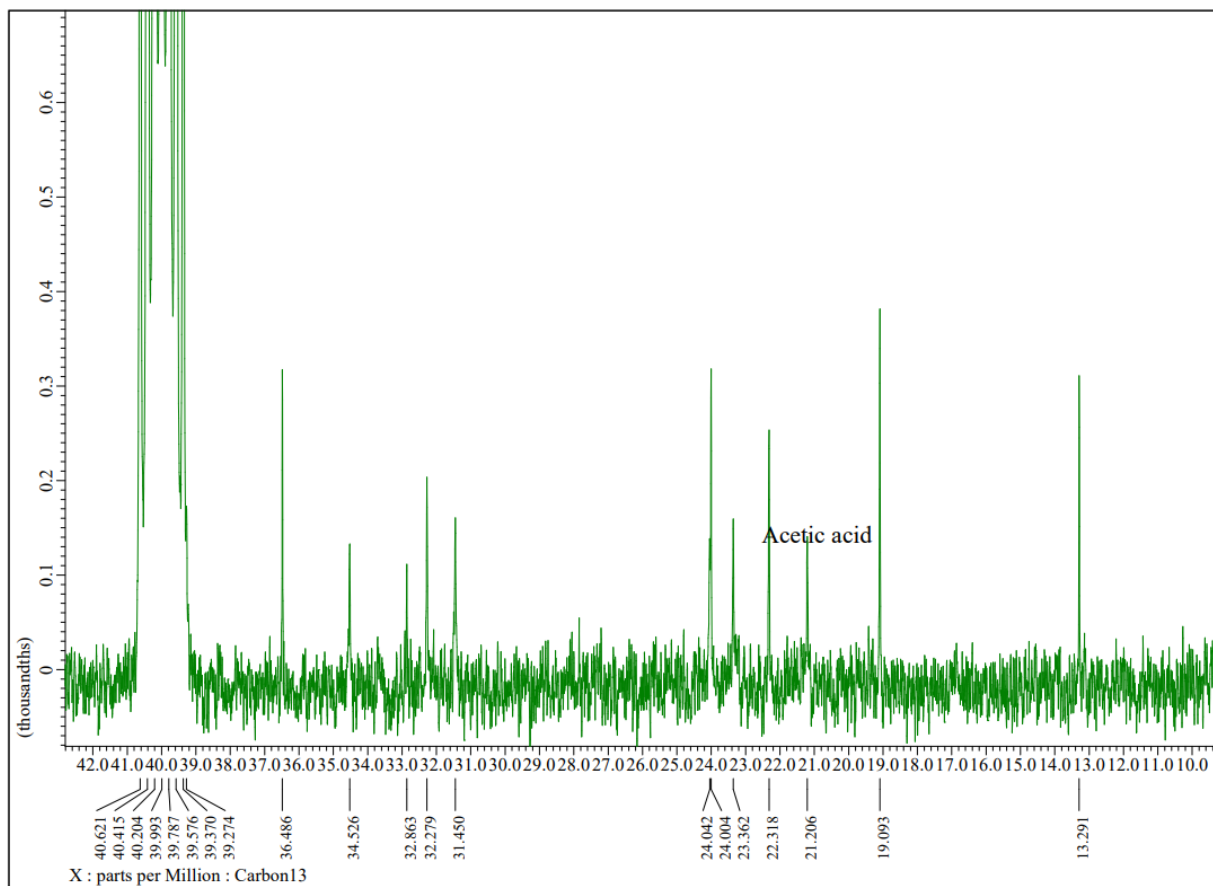

**Figure S-35:**  $^{13}\text{C}$  NMR spectrum of compound **E19** in  $\text{DMSO-}d_6$

Arkansas Statewide Mass Spectrometry Facility

ESI high-res Mass Spectrum

Sample Name: E-12  
Sample id#: 5190  
Instrument: Shimadzu IT-TOF

9/20/2023

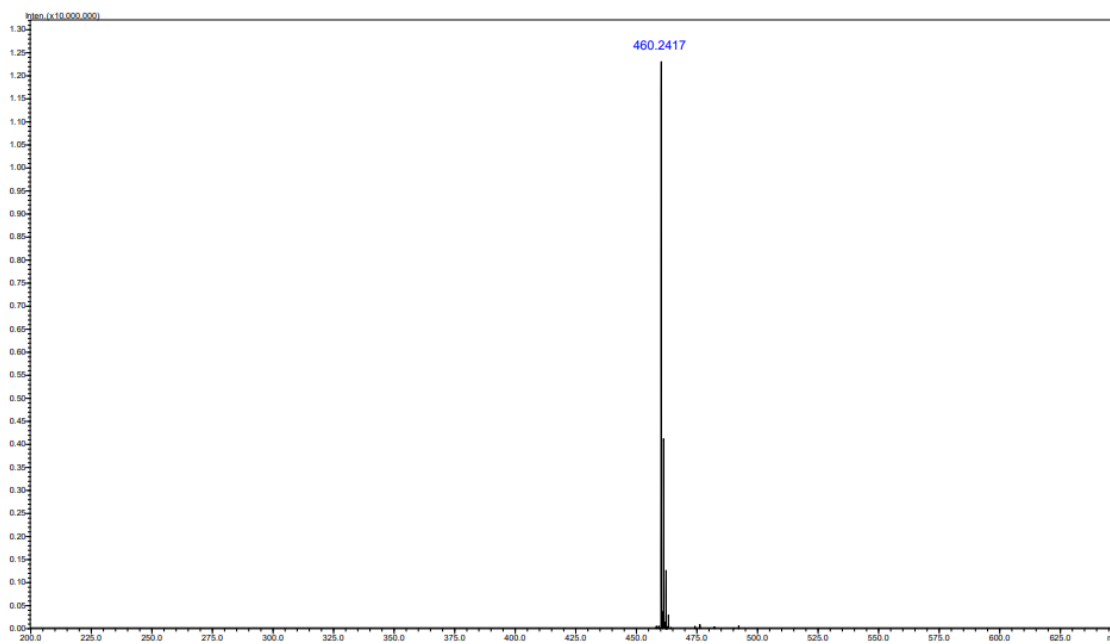

Figure S-36: High-resolution mass spectrum of compound E19

(1*S*,2*R*,13*R*,14*S*,17*R*,18*S*)-17-Ethynyl-7-[(5-fluoro-2-pyridyl)amino]-2,18-dimethyl-8-thia-6-azapentacyclo[11.7.0.0<sup>2,10</sup>.0<sup>5,9</sup>.0<sup>14,18</sup>]icosa-5(9),6,10-trien-17-ol (E20)

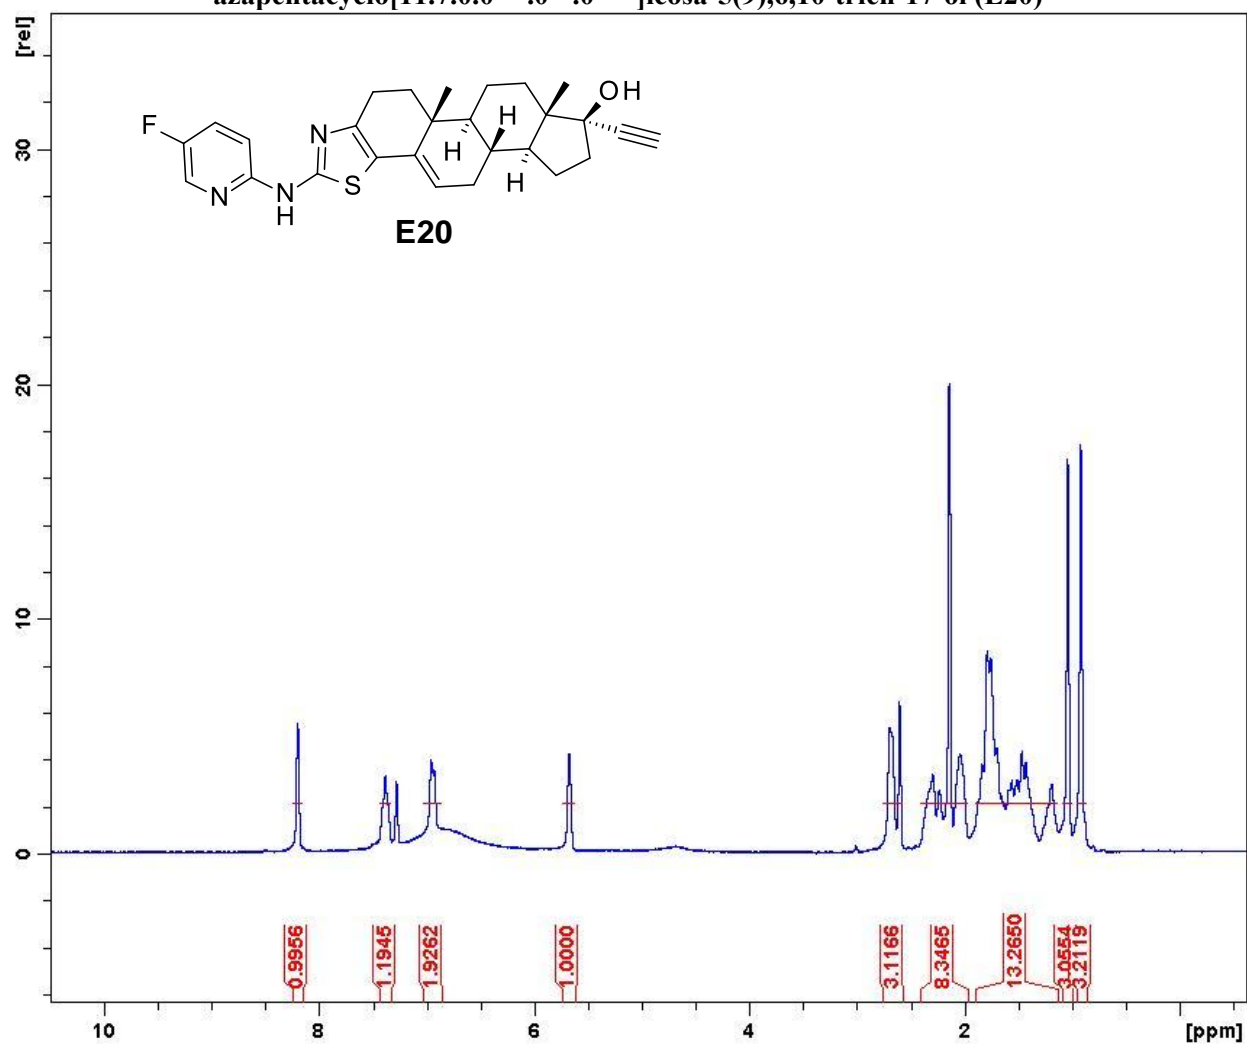

Figure S-37: <sup>1</sup>H NMR spectrum of compound E20 in CDCl<sub>3</sub>

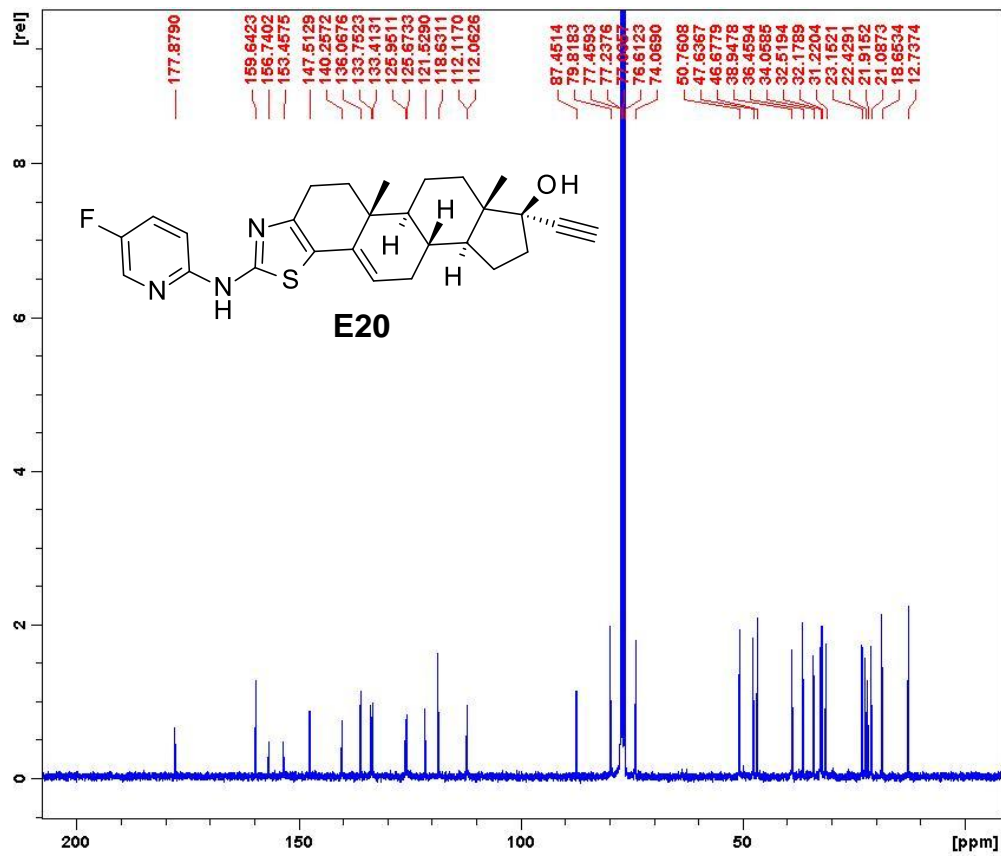

**Figure S-38:  $^{13}\text{C}$  NMR spectrum of compound E20 in  $\text{CDCl}_3$**

Arkansas Statewide Mass Spectrometry Facility  
ESI high-res Mass Spectrum

Sample Name: E-13  
Sample id#: 5191  
Instrument: Shimadzu IT-TOF

9/20/2023

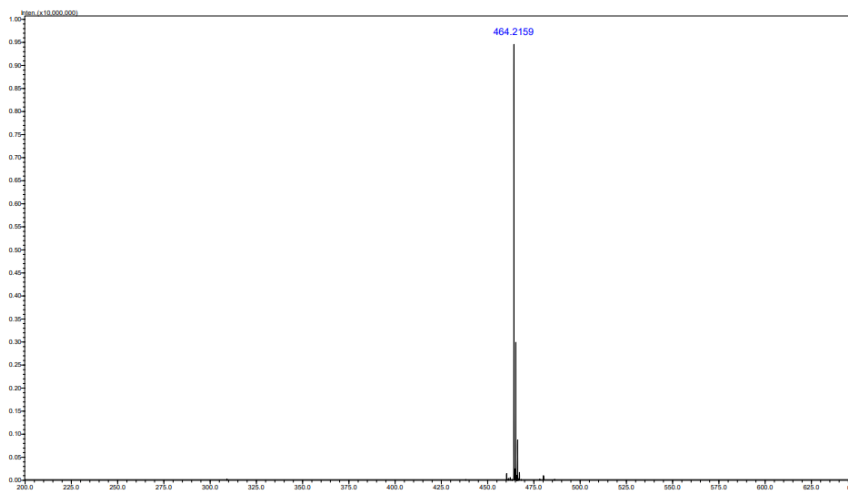

**Figure S-39: High-resolution mass spectrum of compound E20**

(1*S*,2*R*,13*R*,14*S*,17*R*,18*S*)-7-[(4-Chloro-2-pyridyl)amino]-17-ethynyl-2,18-dimethyl-8-thia-6-azapentacyclo[11.7.0.0<sup>2,10</sup>.0<sup>5,9</sup>.0<sup>14,18</sup>]icosa-5(9),6,10-trien-17-ol (E21)

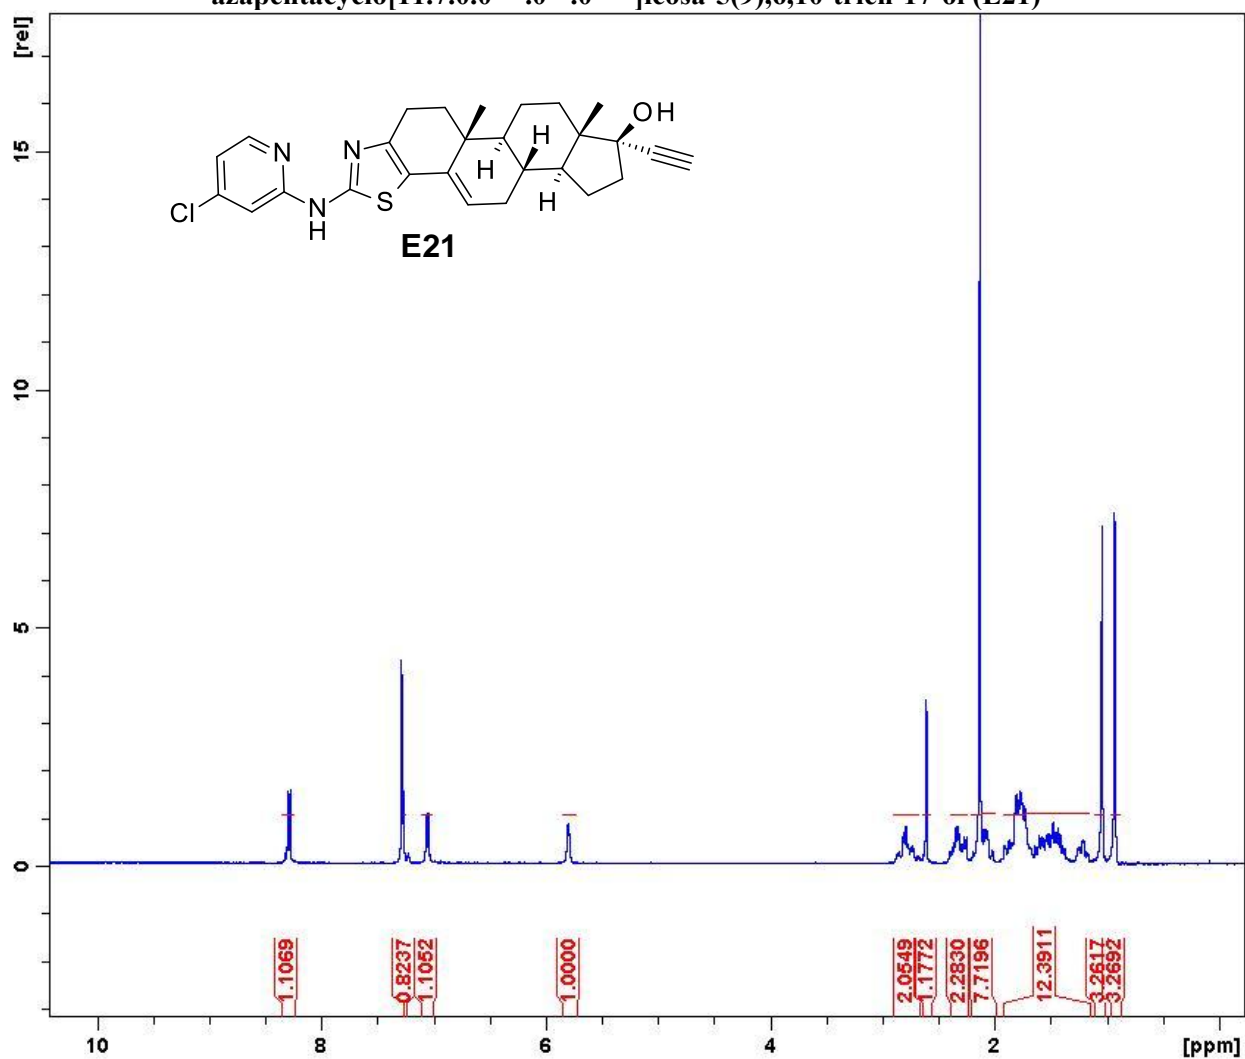

Figure S-40: <sup>1</sup>H NMR spectrum of compound E21 in CDCl<sub>3</sub>

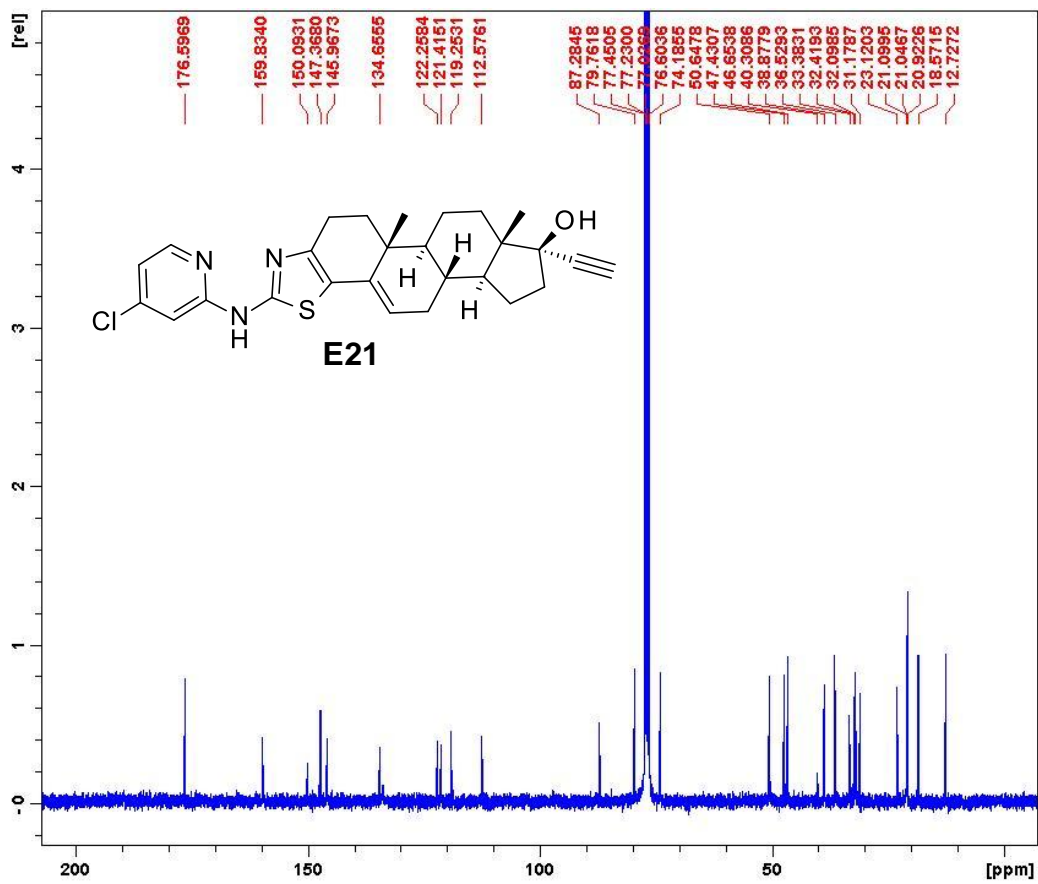

Figure S-41: <sup>13</sup>C NMR spectrum of compound E21 in CDCl<sub>3</sub>

Arkansas Statewide Mass Spectrometry Facility

ESI high-res Mass Spectrum

Sample Name: E-14  
 Sample id#: 5192  
 Instrument: Shimadzu IT-TOF

9/20/2023

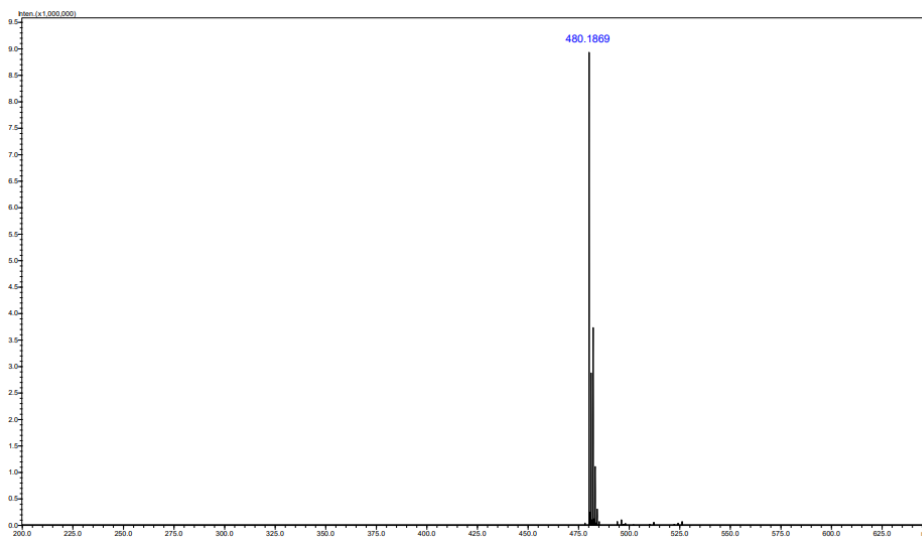



# Arkansas Statewide Mass Spectrometry Facility

## ESI high-res Mass Spectrum

Sample Name: E-14  
Sample id#: 5192  
Instrument: Shimadzu IT-TOF

9/20/2023

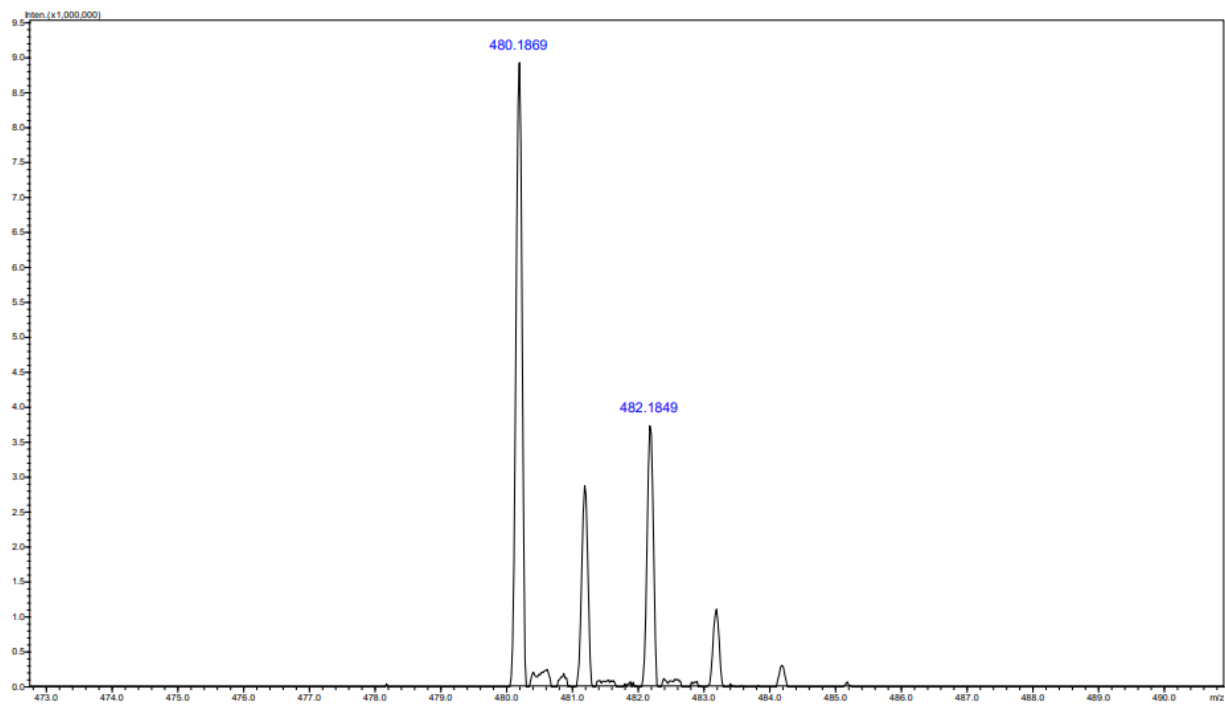

**Figure S-42:** High-resolution mass spectrum of compound **E21**

(1*S*,2*R*,13*R*,14*S*,17*R*,18*S*)-7-[(5-Chloro-2-pyridyl)amino]-17-ethynyl-2,18-dimethyl-8-thia-6-azapentacyclo[11.7.0.0<sup>2,10</sup>.0<sup>5,9</sup>.0<sup>14,18</sup>]icosa-5(9),6,10-trien-17-ol (E22)

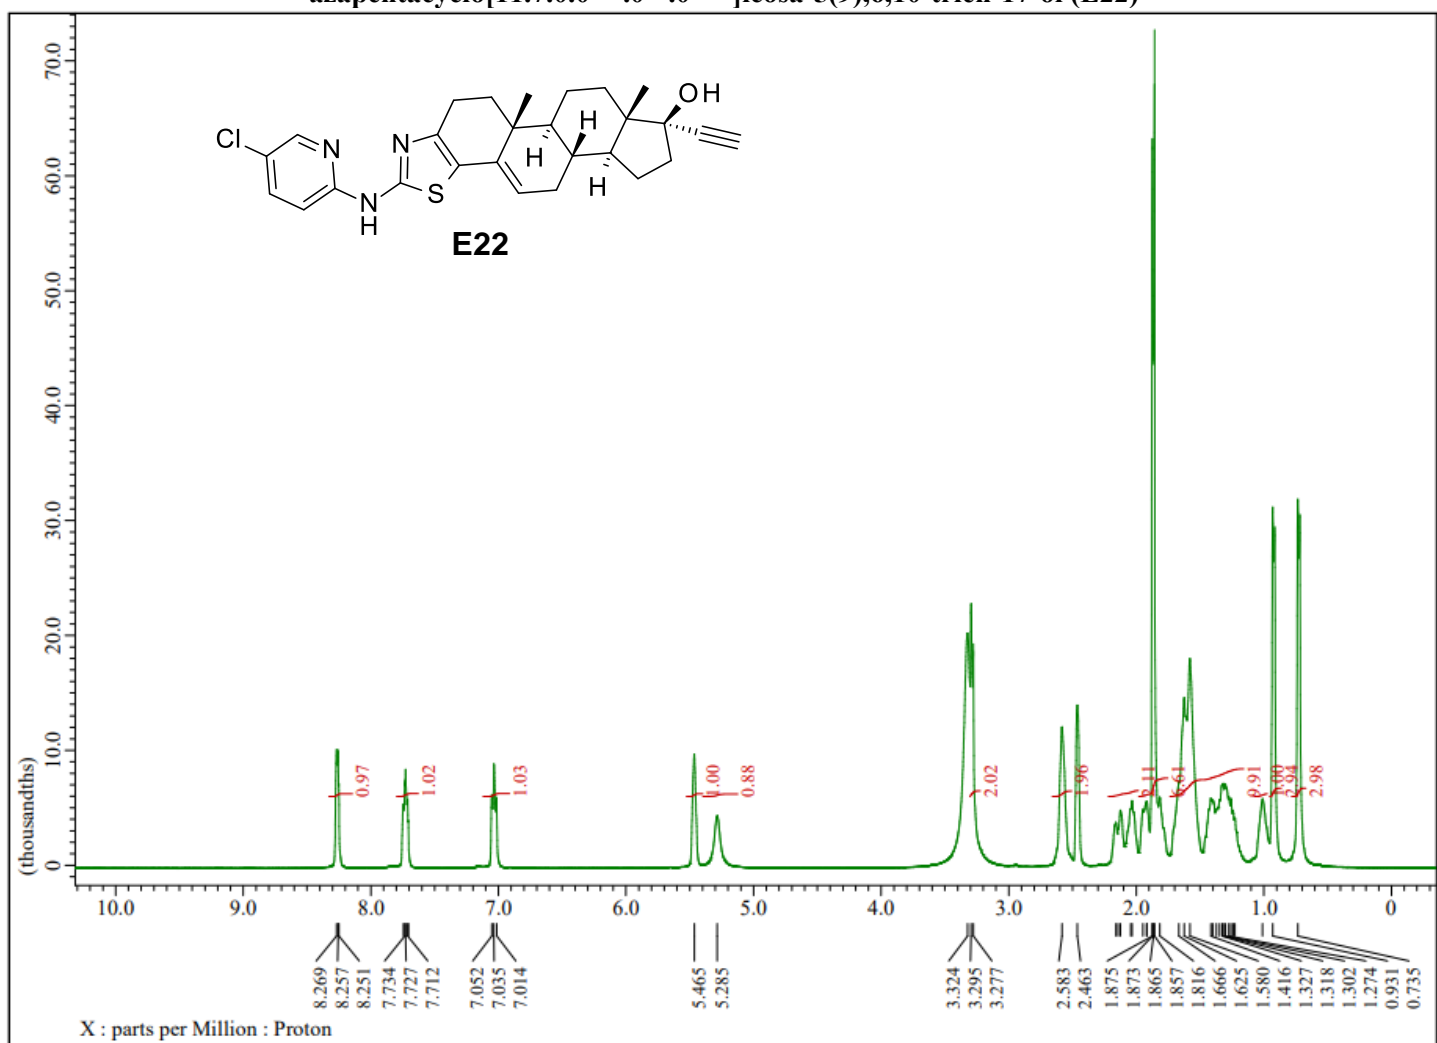

Figure S-43: <sup>1</sup>H NMR spectrum of compound E22 in DMSO-*d*<sub>6</sub>

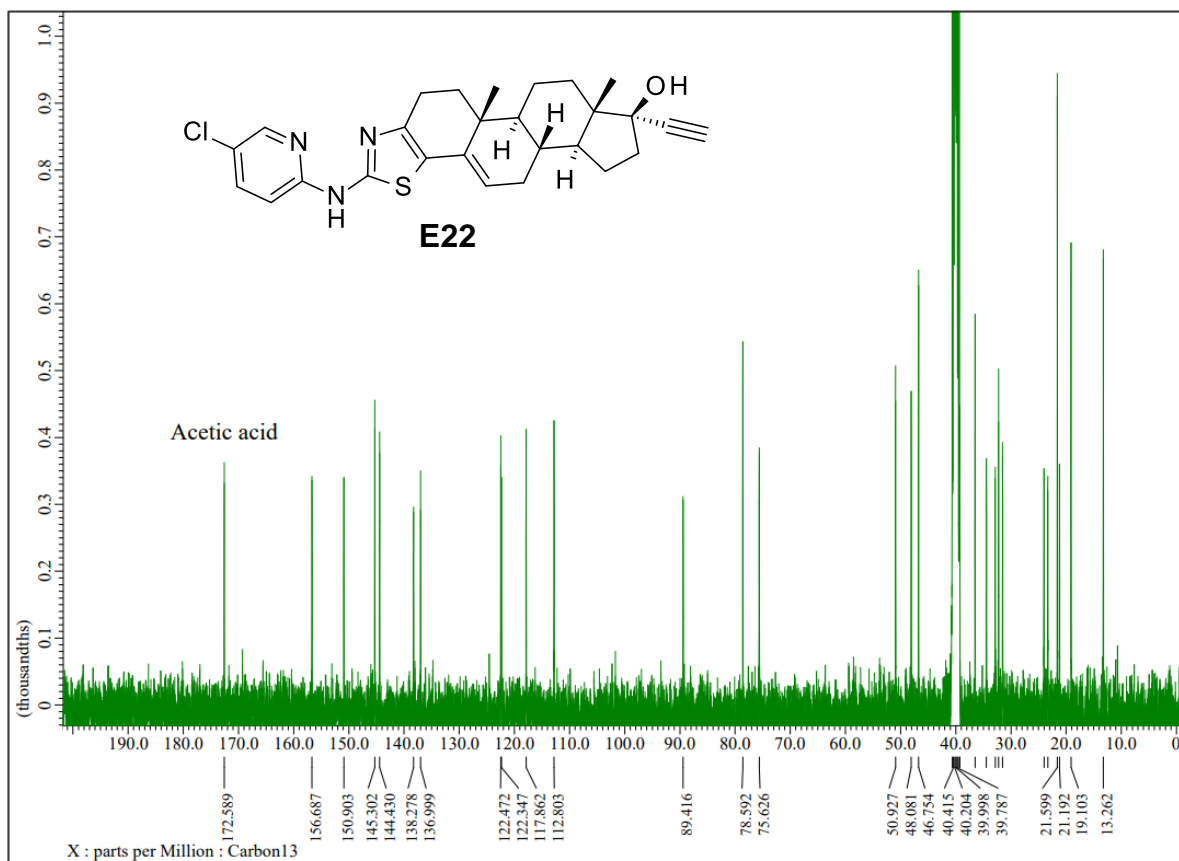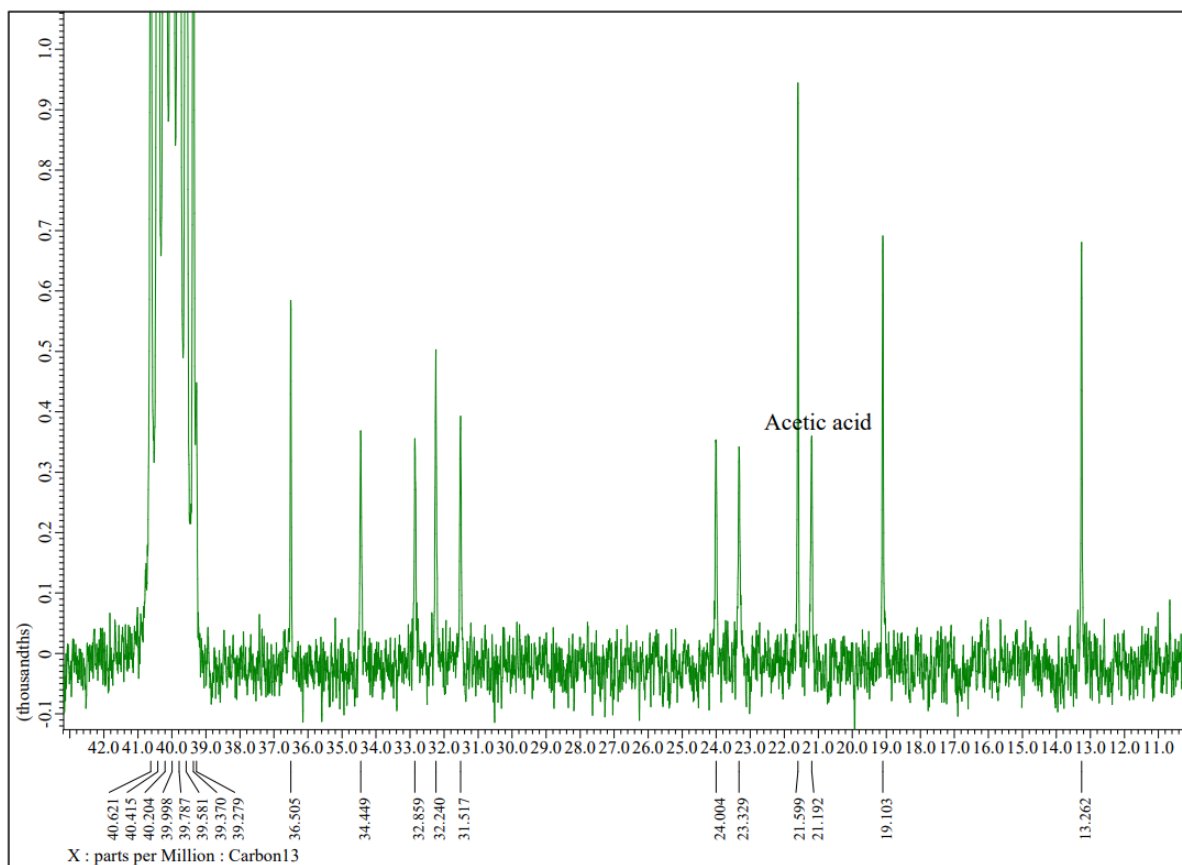

**Figure S-44:**  $^{13}\text{C}$  NMR spectrum of compound **E22** in  $\text{DMSO-}d_6$

Arkansas Statewide Mass Spectrometry Facility

ESI high-res Mass Spectrum

Sample Name: E-15  
Sample id#: 5193  
Instrument: Shimadzu IT-TOF

9/20/2023

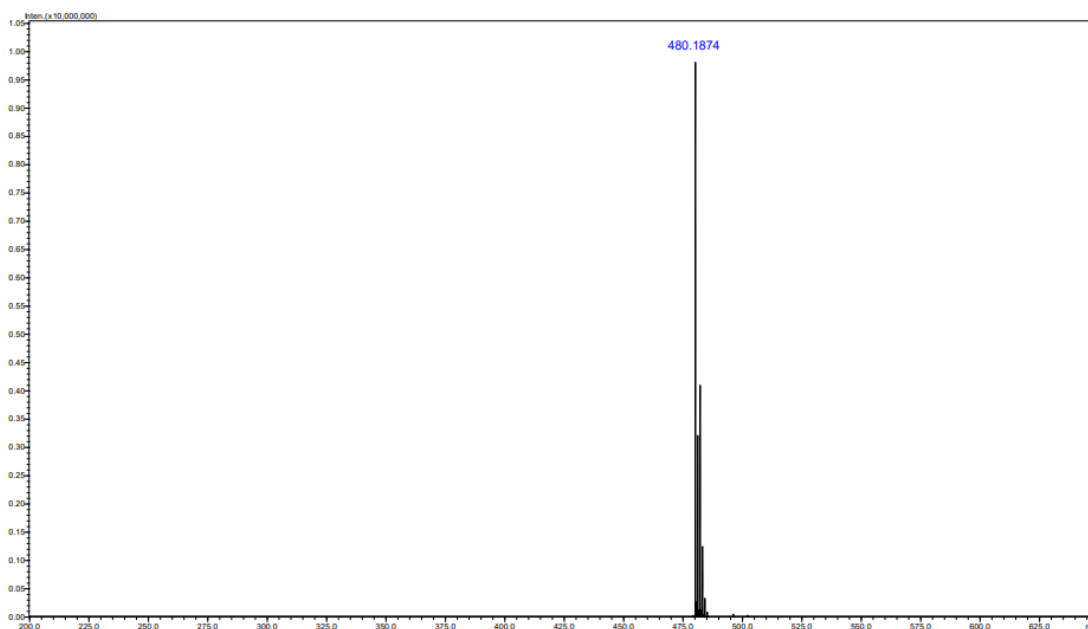

Arkansas Statewide Mass Spectrometry Facility

ESI high-res Mass Spectrum

Sample Name: E-15  
Sample id#: 5193  
Instrument: Shimadzu IT-TOF

9/20/2023

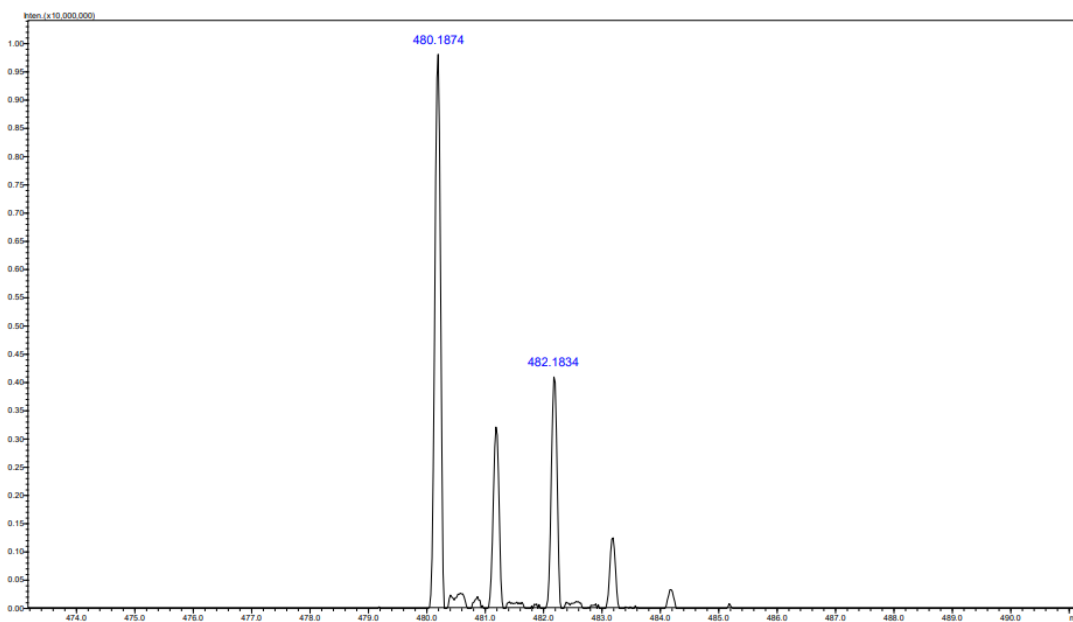

Figure S-45: High-resolution mass spectrum of compound E22

(1*S*,2*R*,13*R*,14*S*,17*R*,18*S*)-7-[(6-Chloro-2-pyridyl)amino]-17-ethynyl-2,18-dimethyl-8-thia-6-azapentacyclo[11.7.0.0<sup>2,10</sup>.0<sup>5,9</sup>.0<sup>14,18</sup>]icosa-5(9),6,10-trien-17-ol (E23)

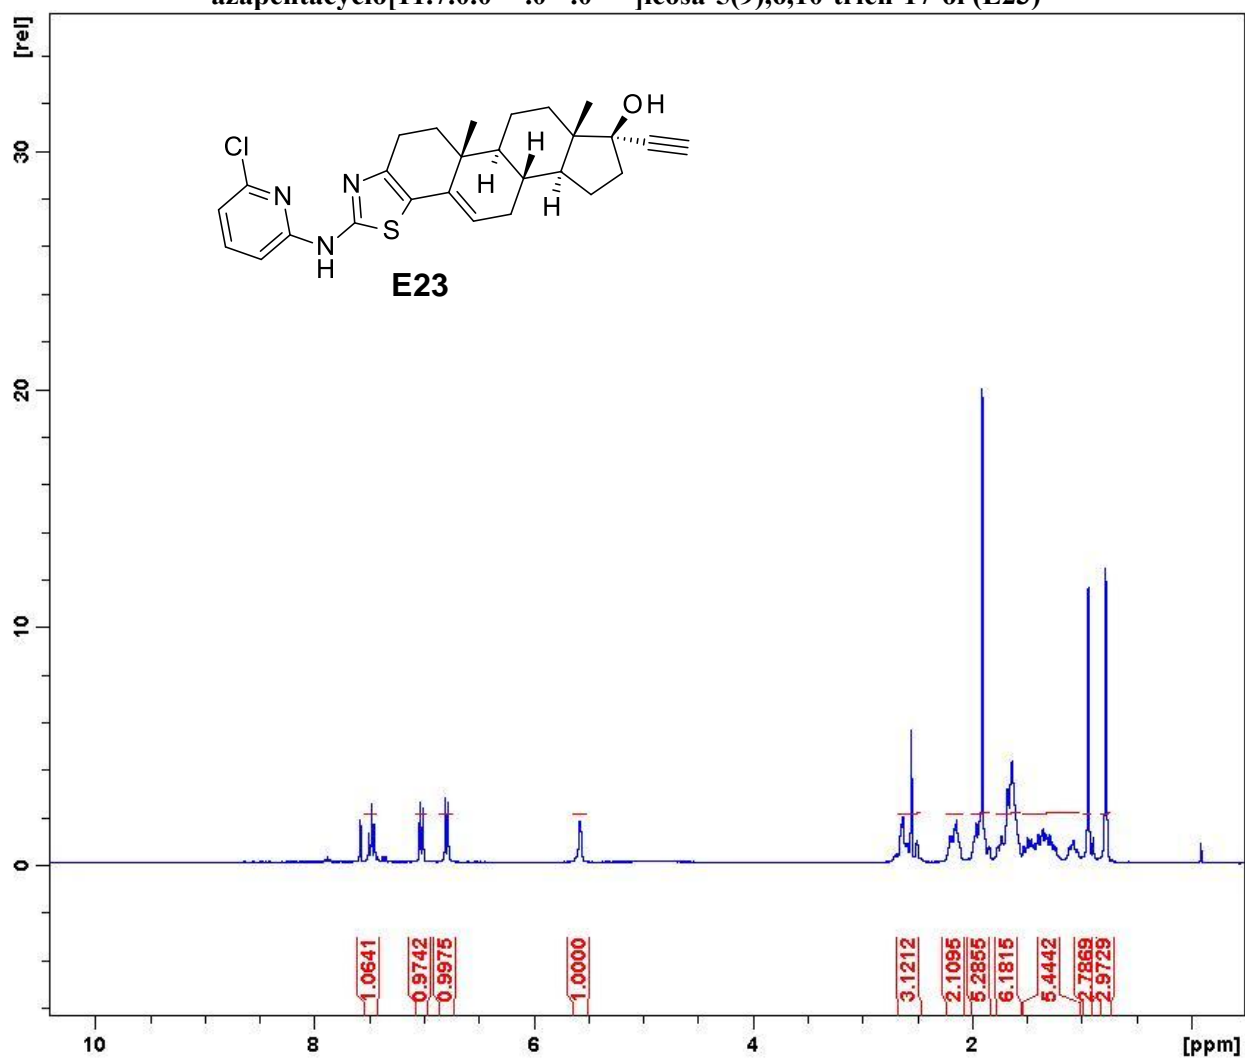

Figure S-46: <sup>1</sup>H NMR spectrum of compound E23 in CDCl<sub>3</sub>

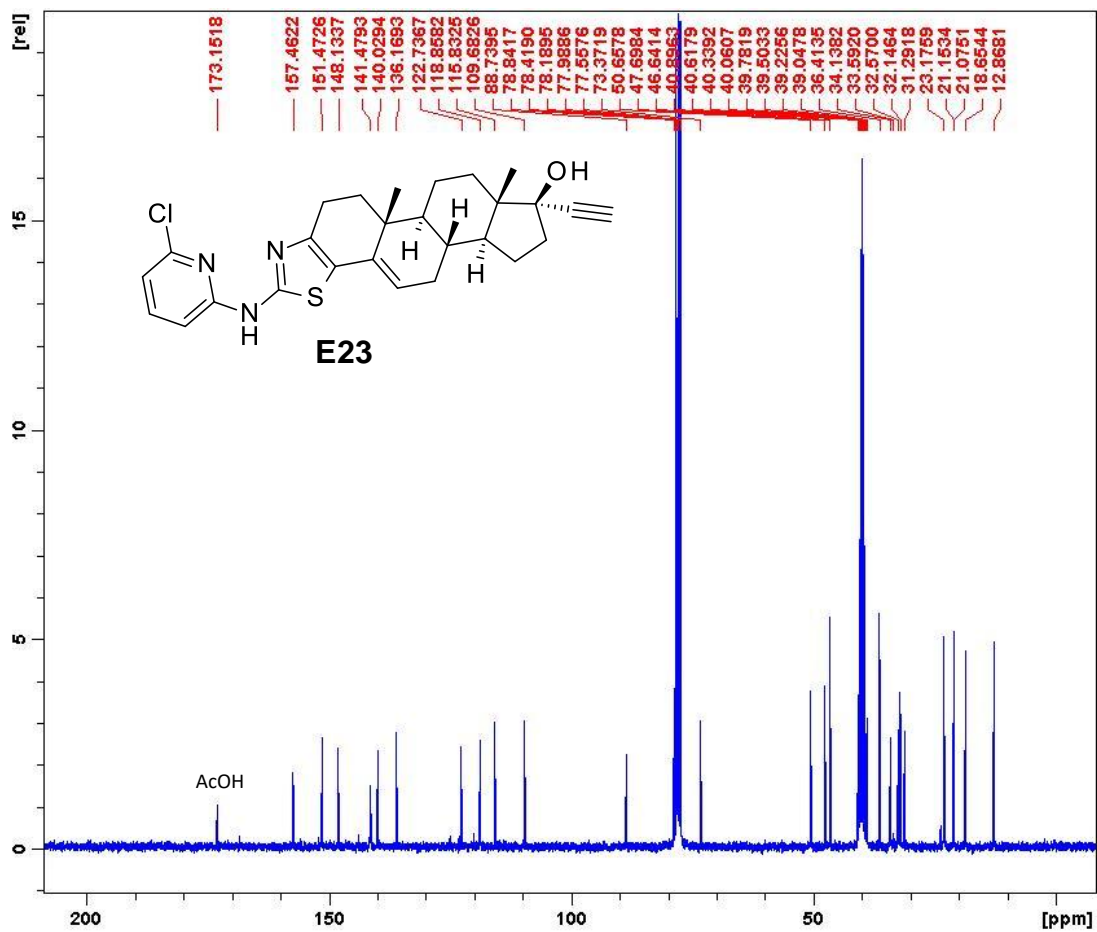

Figure S-47:  $^{13}\text{C}$  NMR spectrum of compound E23 in  $\text{CDCl}_3$  and  $\text{DMSO}-d_6$

Arkansas Statewide Mass Spectrometry Facility  
ESI high-res Mass Spectrum

Sample Name: E-16  
Sample id#: 5194  
Instrument: Shimadzu IT-TOF

9/20/2023

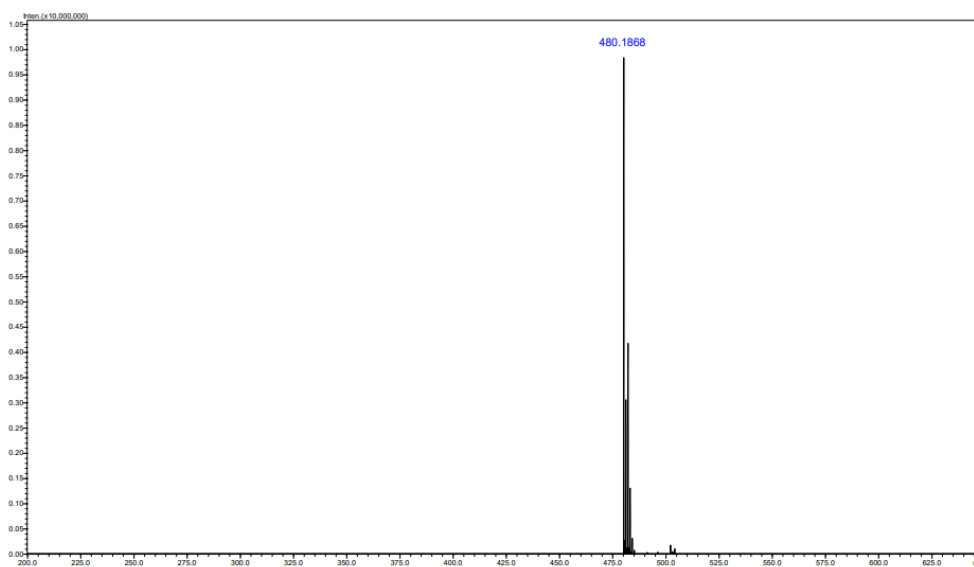

Arkansas Statewide Mass Spectrometry Facility

ESI high-res Mass Spectrum

Sample Name: E-16  
Sample id#: 5194  
Instrument: Shimadzu IT-TOF

9/20/2023

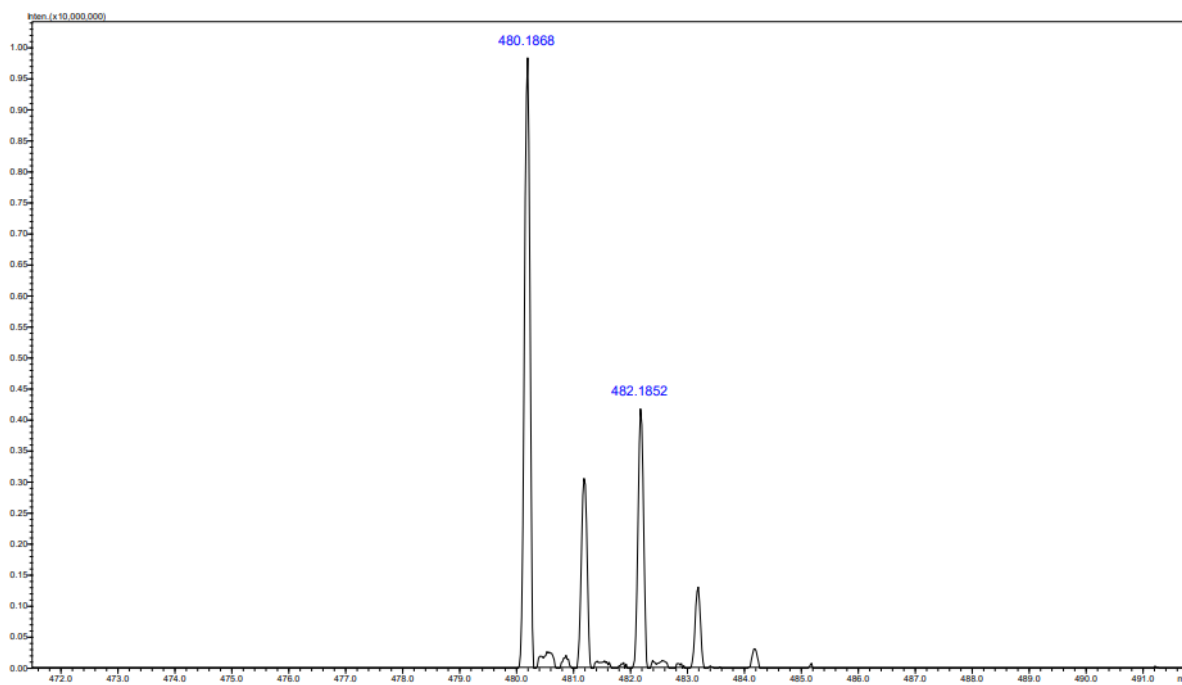

Figure S-48: High-resolution mass spectrum of compound E23

(1*S*,2*R*,13*R*,14*S*,17*R*,18*S*)-7-[(4,6-Dimethyl-2-pyridyl)amino]-17-ethynyl-2,18-dimethyl-8-thia-6-azapentacyclo[11.7.0.0<sup>2,10</sup>.0<sup>5,9</sup>.0<sup>14,18</sup>]icosa-5(9),6,10-trien-17-ol (E24)

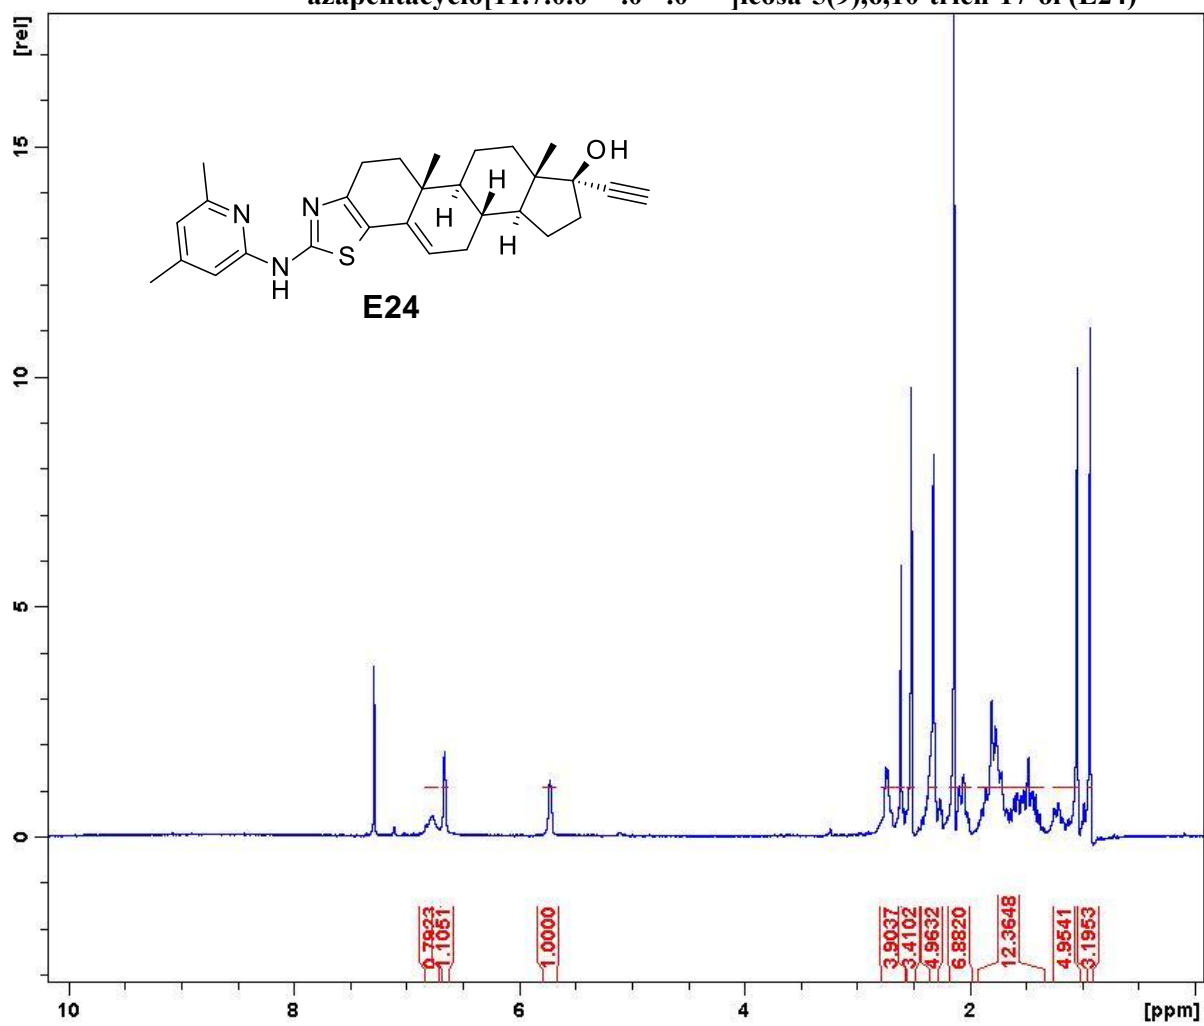

Figure S-49: <sup>1</sup>H NMR spectrum of compound E24 in CDCl<sub>3</sub>



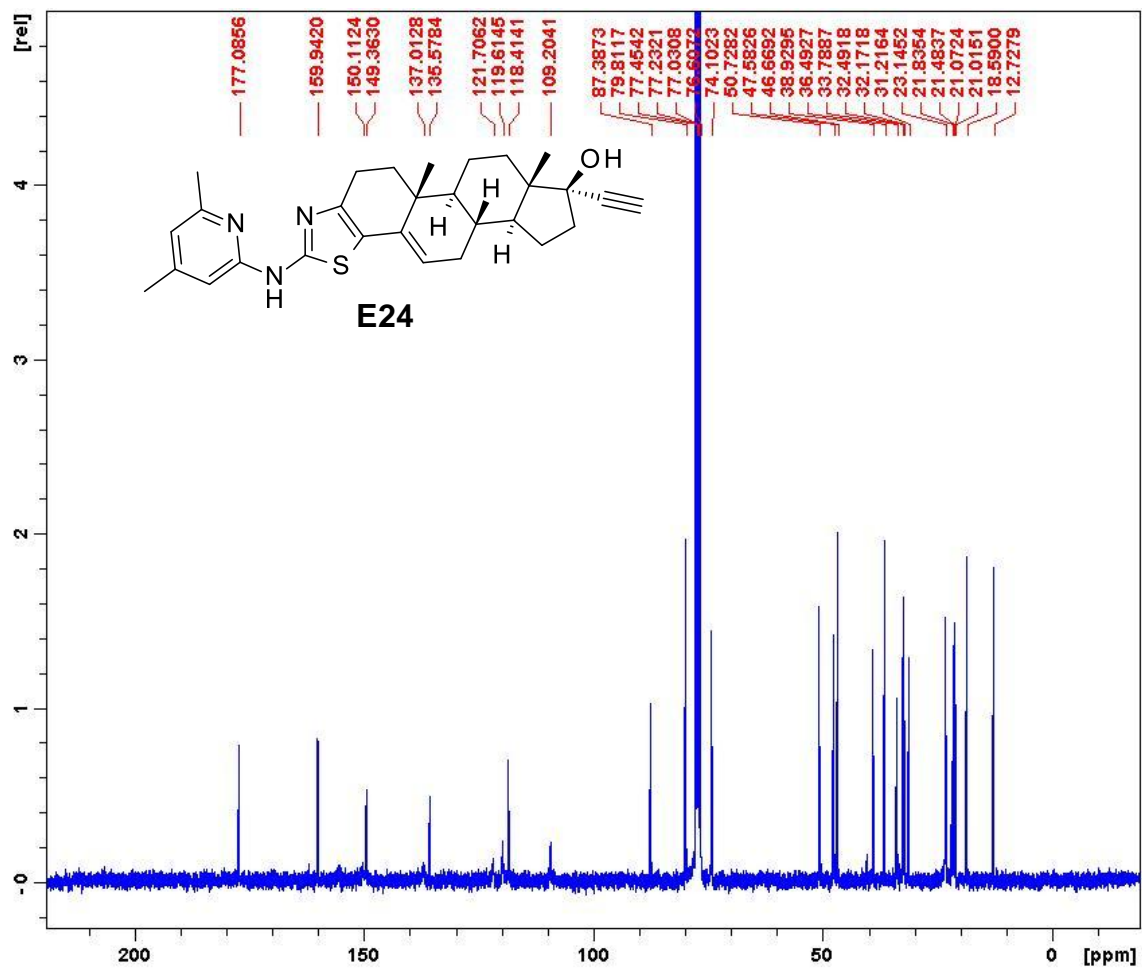

Figure S-50:  $^{13}\text{C}$  NMR spectrum of compound **E24** in  $\text{CDCl}_3$

Arkansas Statewide Mass Spectrometry Facility

ESI high-res Mass Spectrum

Sample Name: E-17  
 Sample id#: 5195  
 Instrument: Shimadzu IT-TOF

9/20/2023

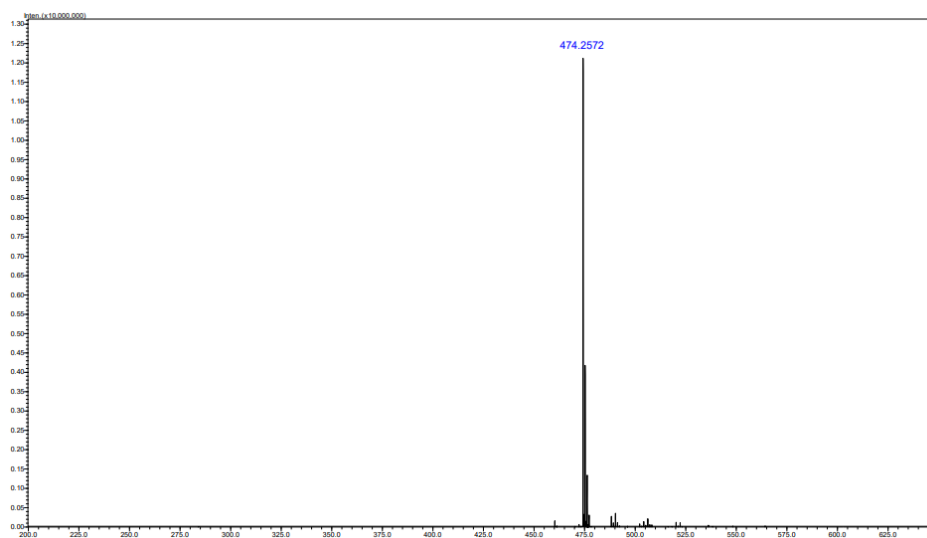

Figure S-51: High-resolution mass spectrum of compound **E24**

(1*S*,2*R*,13*R*,14*S*,17*R*,18*S*)-17-Ethynyl-7-[(4-methoxy-6-methyl-pyrimidin-2-yl)amino]-2,18-dimethyl-8-thia-6-azapentacyclo[11.7.0.0<sup>2,10</sup>.0<sup>5,9</sup>.0<sup>14,18</sup>]icosa-5(9),6,10-trien-17-ol (E26)

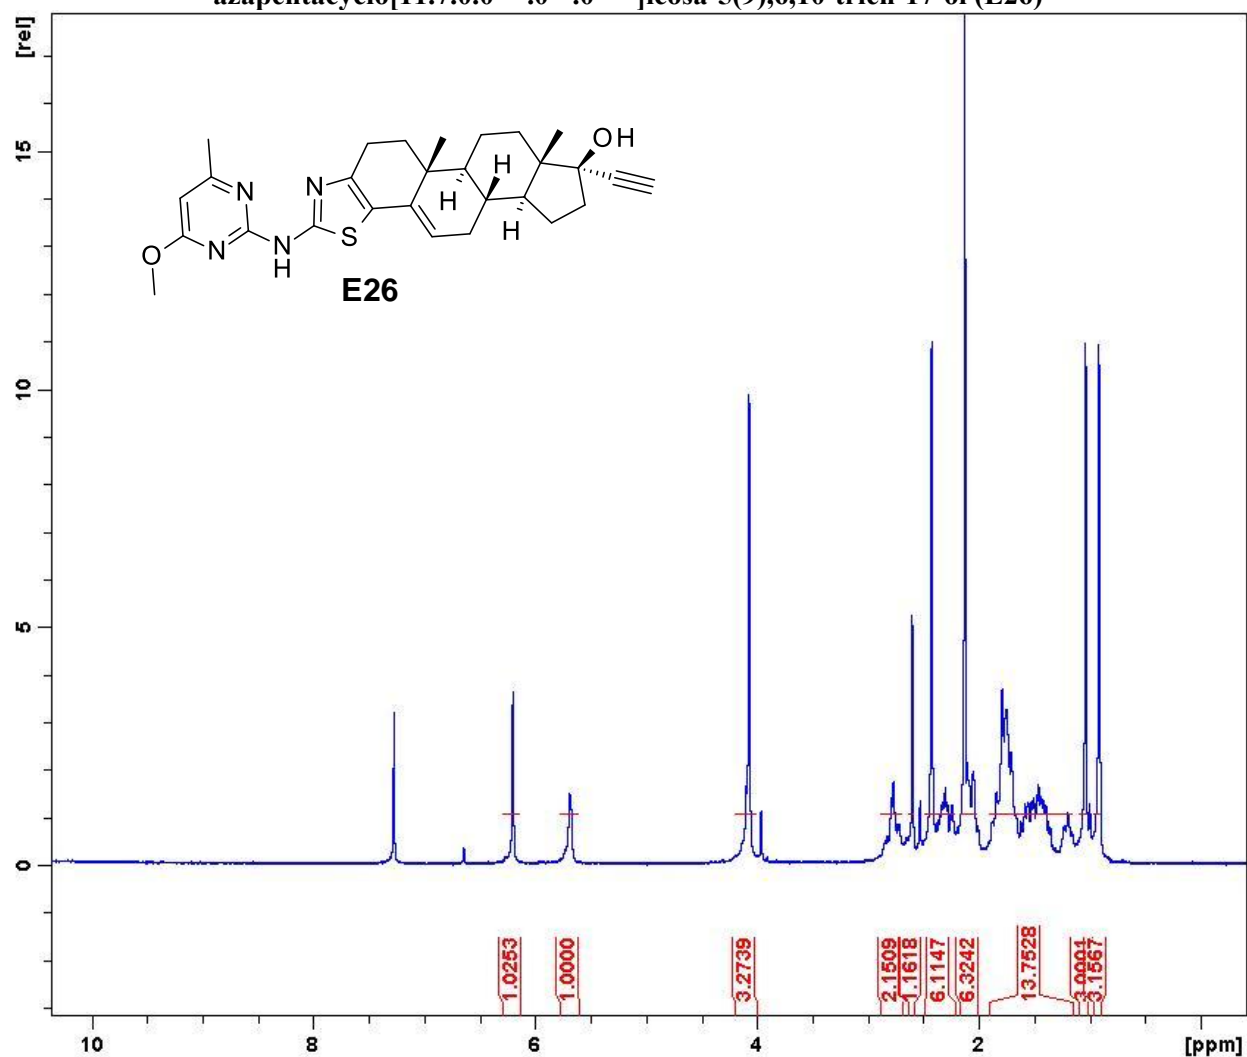

Figure S-52: <sup>1</sup>H NMR spectrum of compound E26 in CDCl<sub>3</sub>

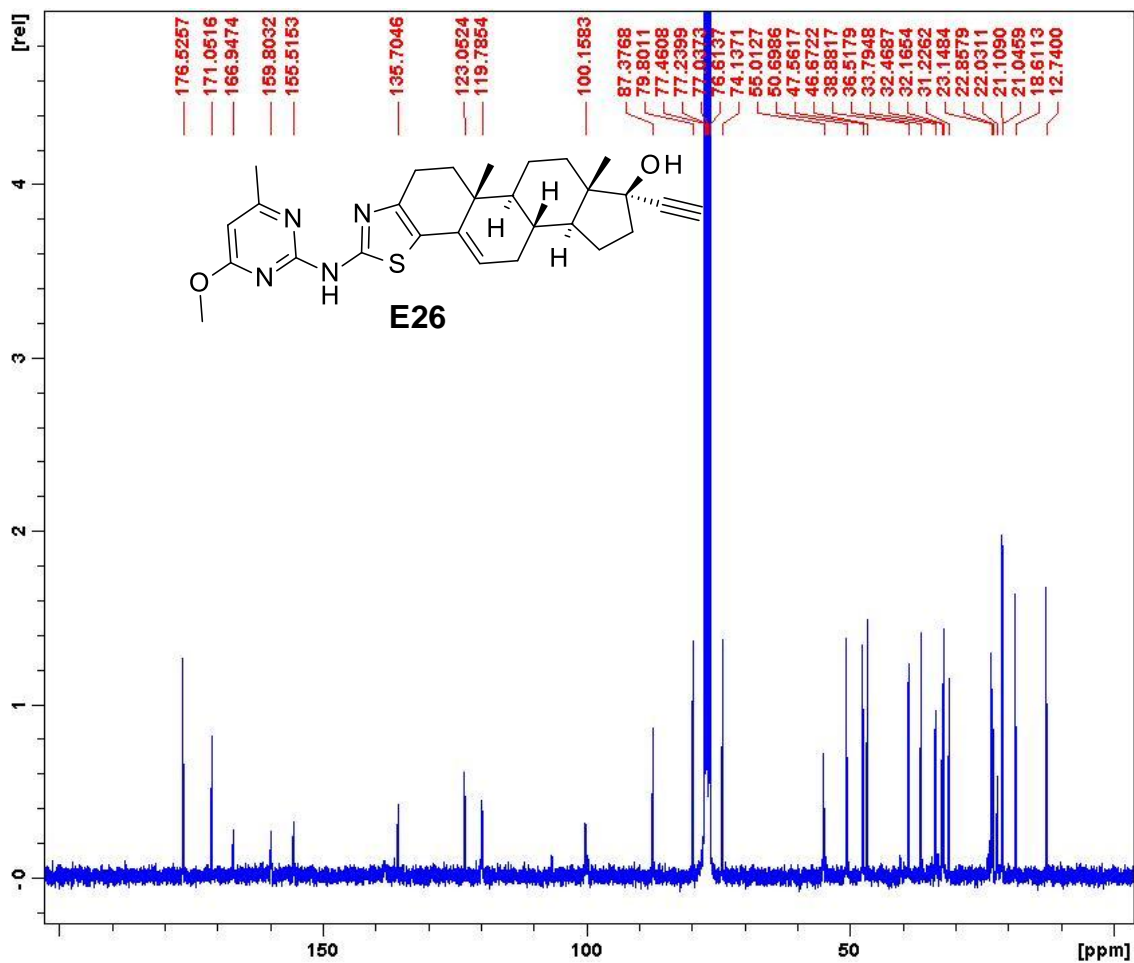

Figure S-53:  $^{13}\text{C}$  NMR spectrum of compound **E26** in  $\text{CDCl}_3$

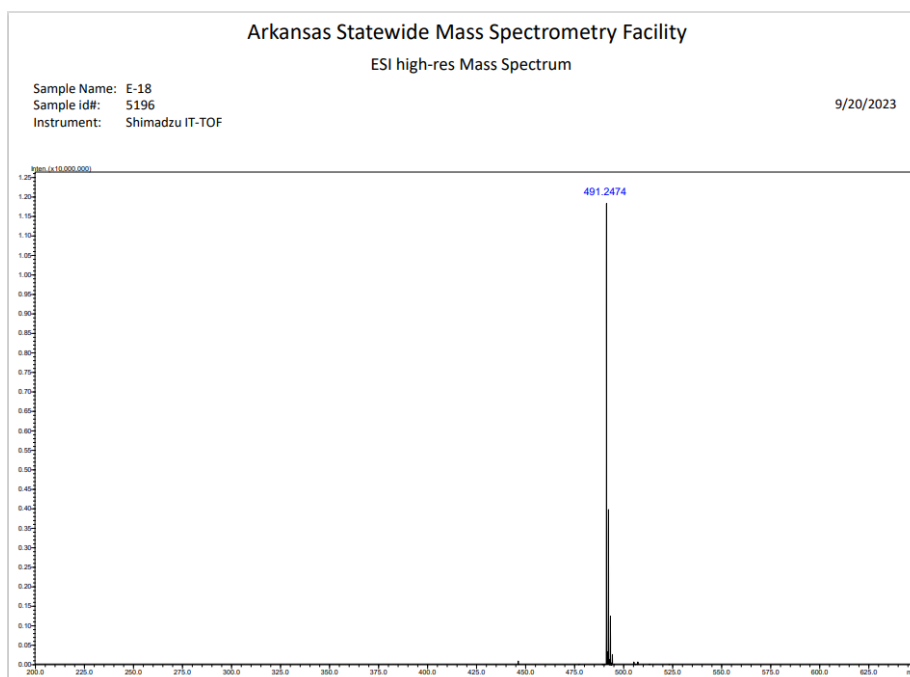

Figure S-54: High-resolution mass spectrum of compound **E26**

(1*S*,2*R*,13*R*,14*S*,17*R*,18*S*)-17-Ethynyl-2,18-dimethyl-7-(1-piperidyl)-8-thia-6-azapentacyclo[11.7.0.0<sup>2,10</sup>.0<sup>5,9</sup>.0<sup>14,18</sup>]icosa-5(9),6,10-trien-17-ol (E27)

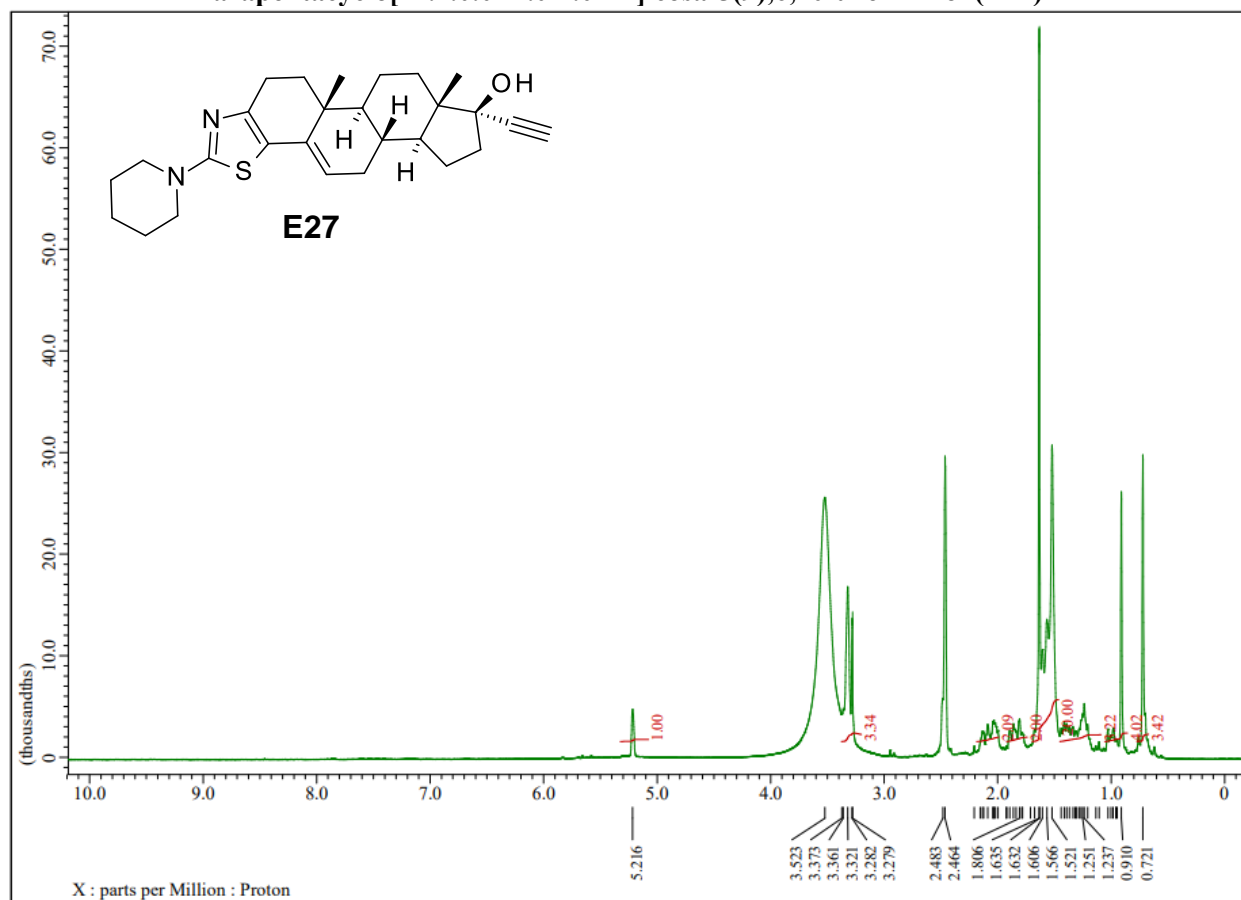

Figure S-55: <sup>1</sup>H NMR spectrum of compound E27 in DMSO-*d*<sub>6</sub>

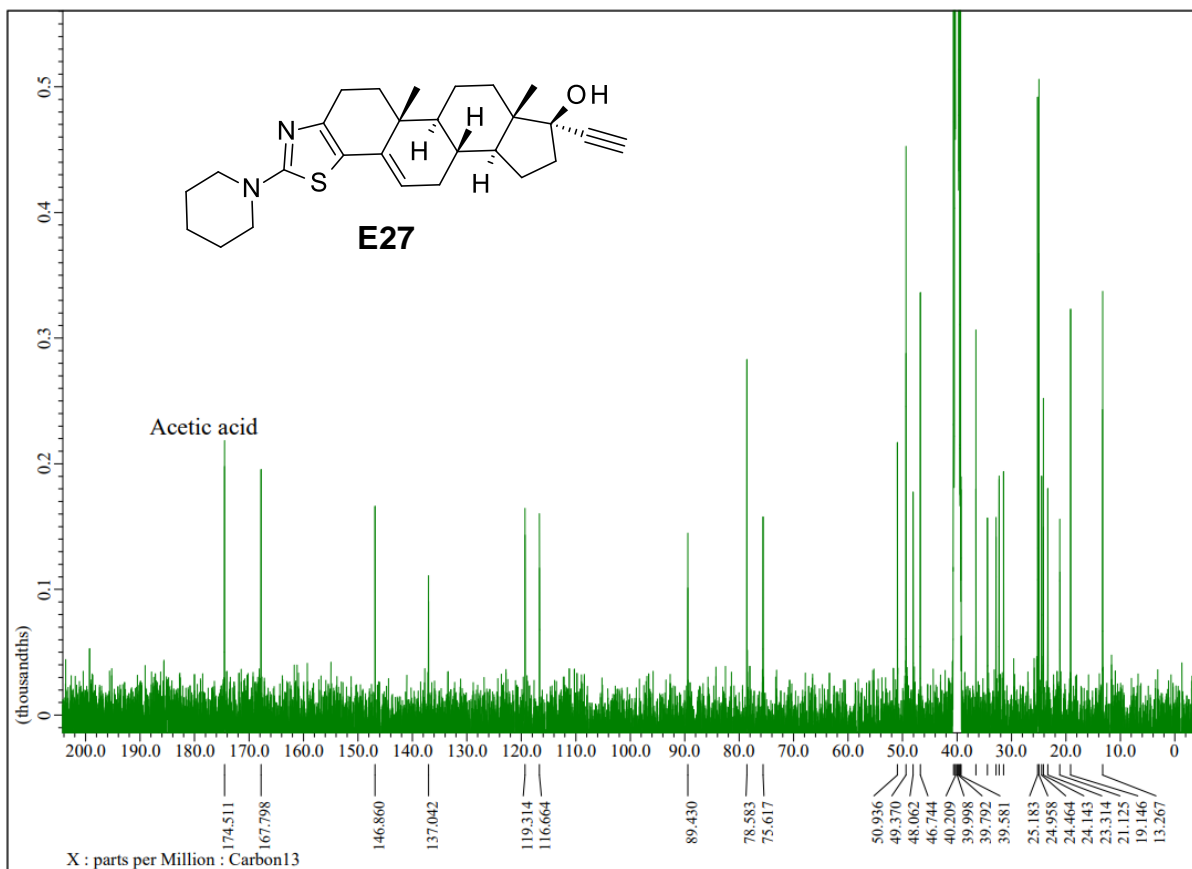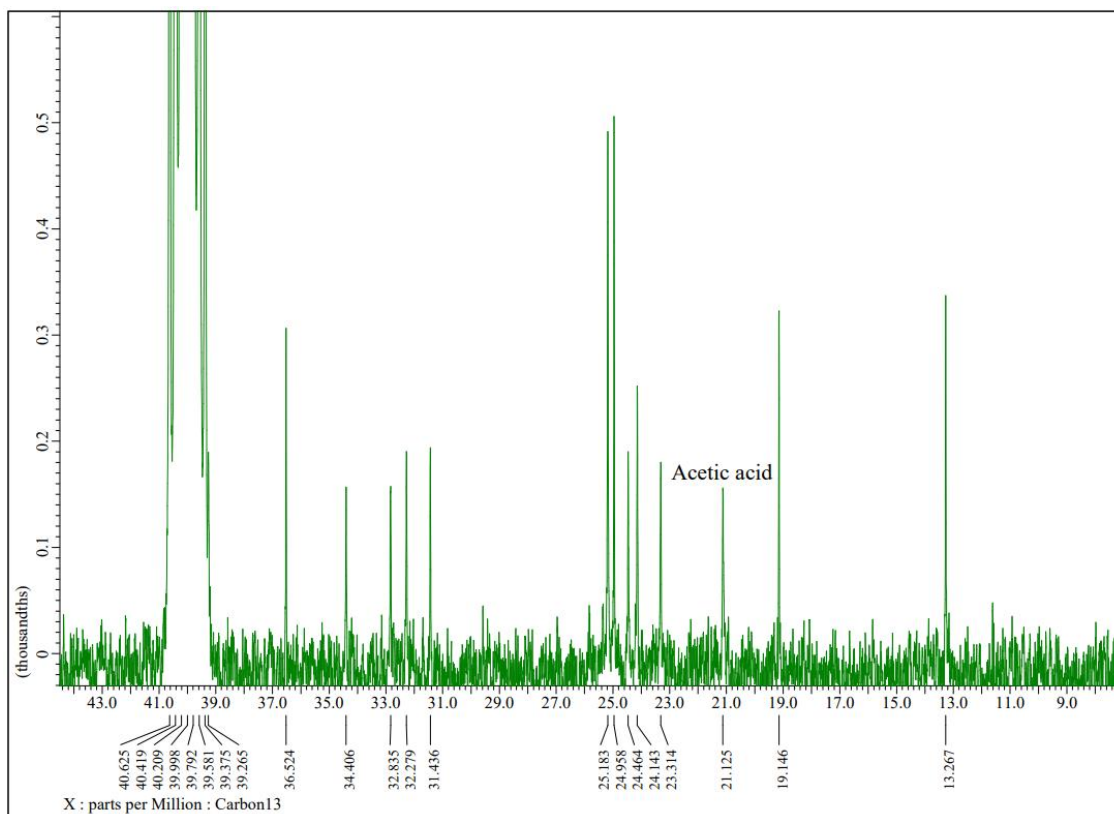

**Figure S-56:**  $^{13}\text{C}$  NMR spectrum of compound **E27** in  $\text{DMSO-}d_6$

Arkansas Statewide Mass Spectrometry Facility

ESI high-res Mass Spectrum

Sample Name: E-19  
Sample id#: 5197  
Instrument: Shimadzu IT-TOF

9/20/2023

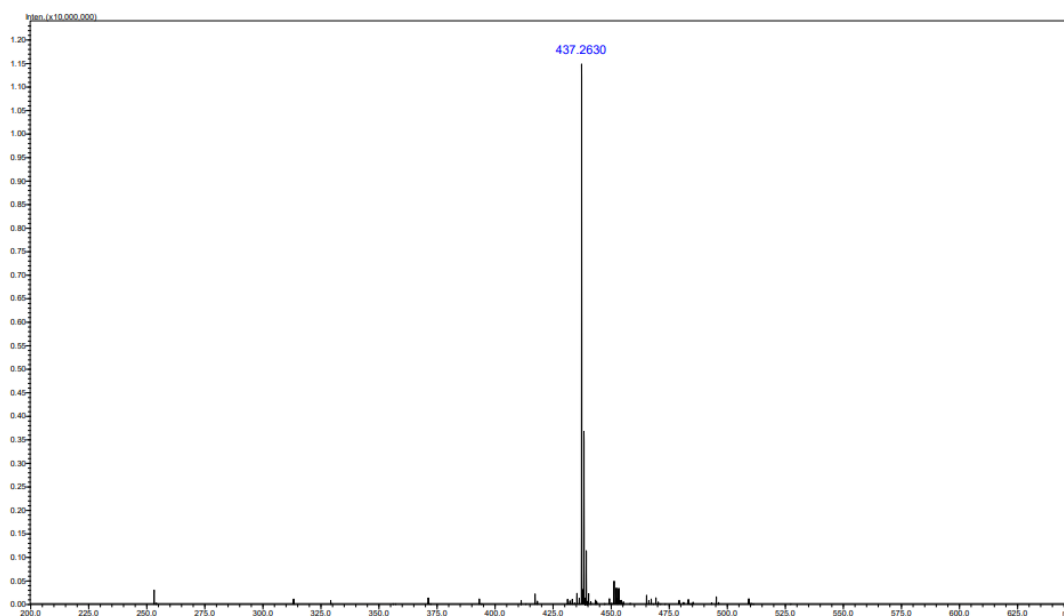

Figure S-57: High-resolution mass spectrum of compound E27

(1*S*,2*R*,13*R*,14*S*,17*R*,18*S*)-17-Ethynyl-2,18-dimethyl-7-(4-methylpiperazin-1-yl)-8-thia-6-azapentacyclo[11.7.0.0<sup>2,10</sup>.0<sup>5,9</sup>.0<sup>14,18</sup>]icosa-5(9),6,10-trien-17-ol (E28)

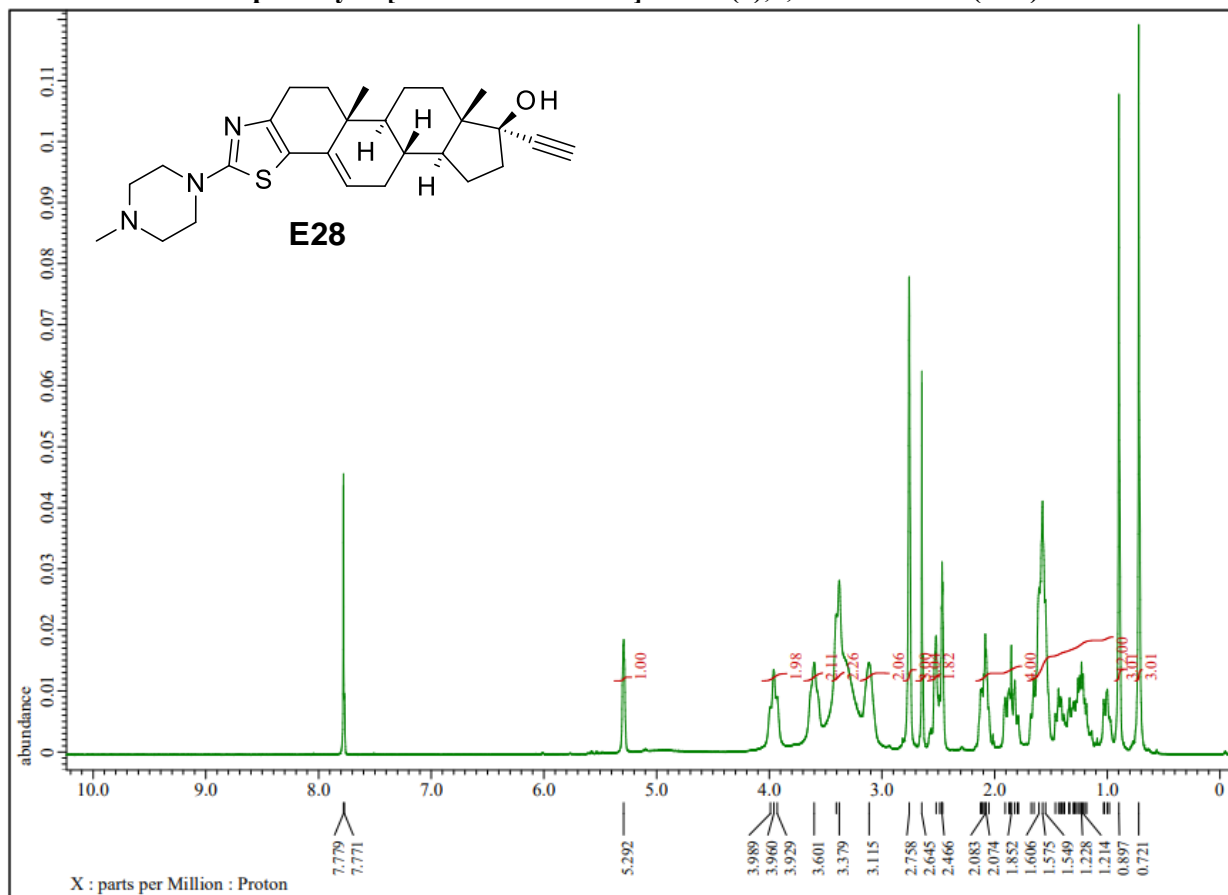

Figure S-58: <sup>1</sup>H NMR spectrum of compound E28 in DMSO-d<sub>6</sub>

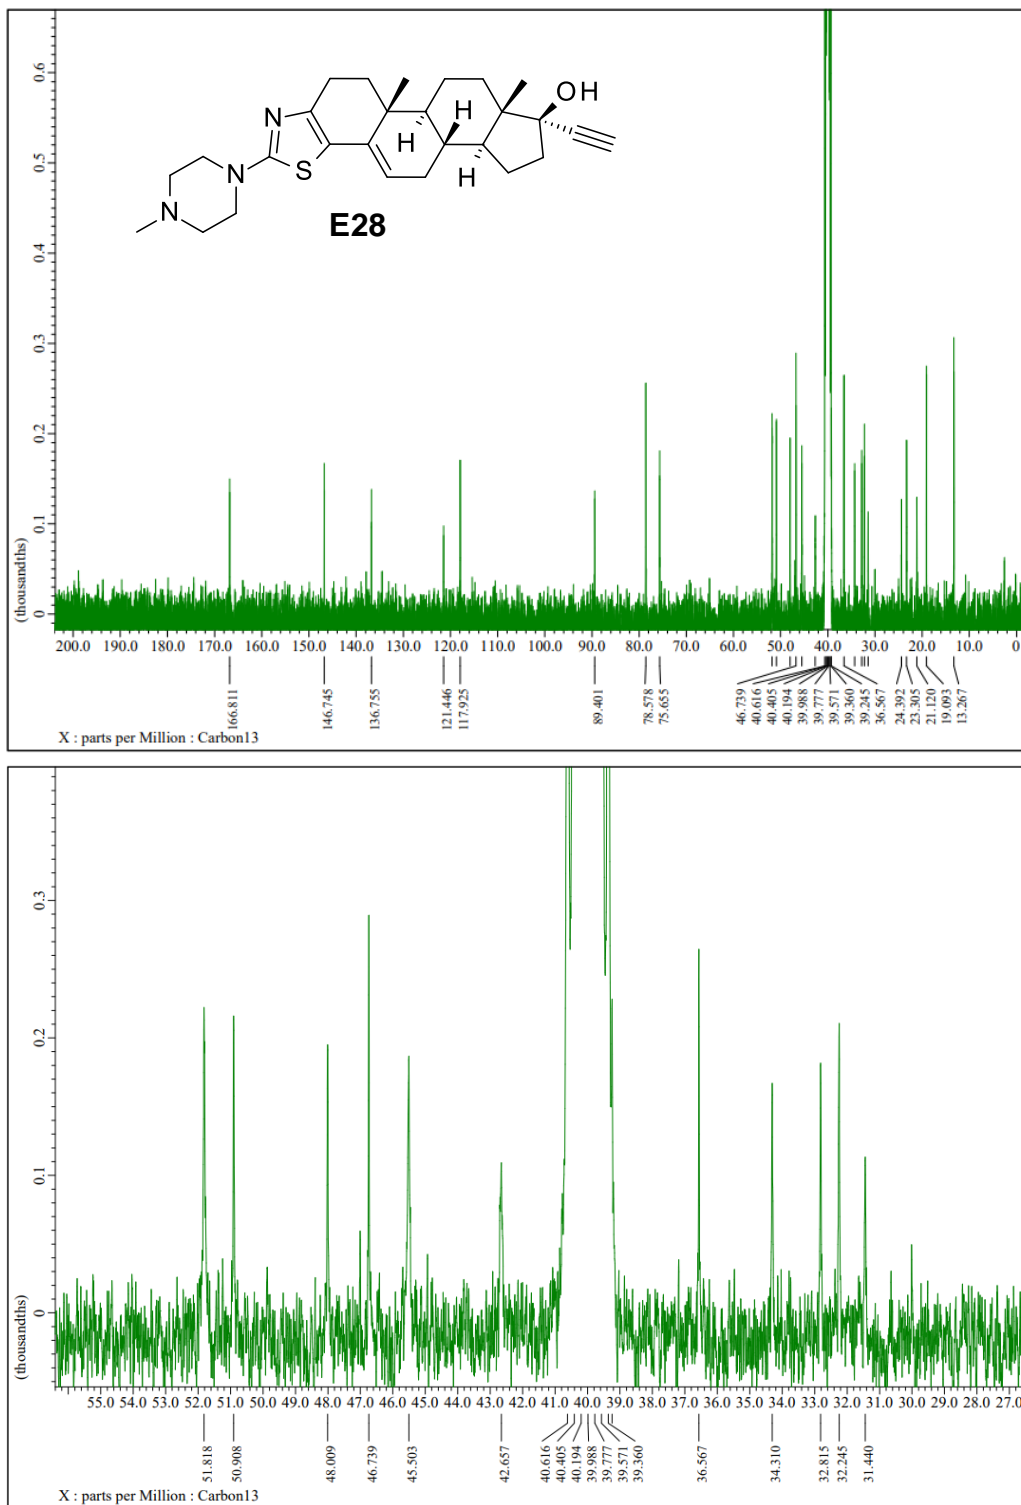

**Figure S-59:**  $^{13}\text{C}$  NMR spectrum of compound **E28** in  $\text{DMSO-}d_6$



Arkansas Statewide Mass Spectrometry Facility

ESI high-res Mass Spectrum

Sample Name: E-20  
Sample id#: 5198  
Instrument: Shimadzu IT-TOF

9/20/2023

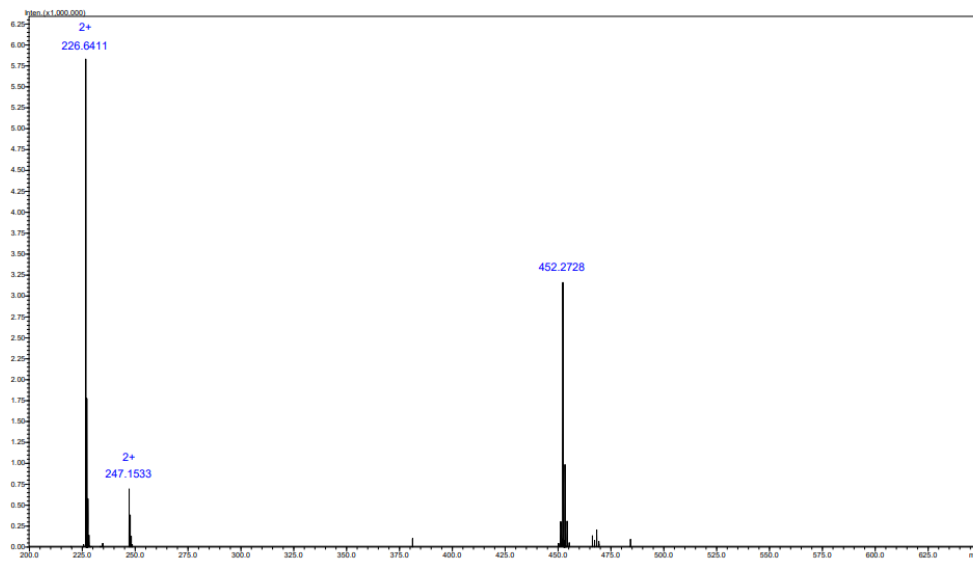

**Figure S-60:** High-resolution mass spectrum of compound **E28**

(1*S*,2*R*,13*R*,14*S*,17*R*,18*S*)-17-Ethynyl-2,7,18-trimethyl-8-thia-6-azapentacyclo[11.7.0.0<sup>2,10</sup>.0<sup>5,9</sup>.0<sup>14,18</sup>]icosa-5(9),6,10-trien-17-ol (E29)

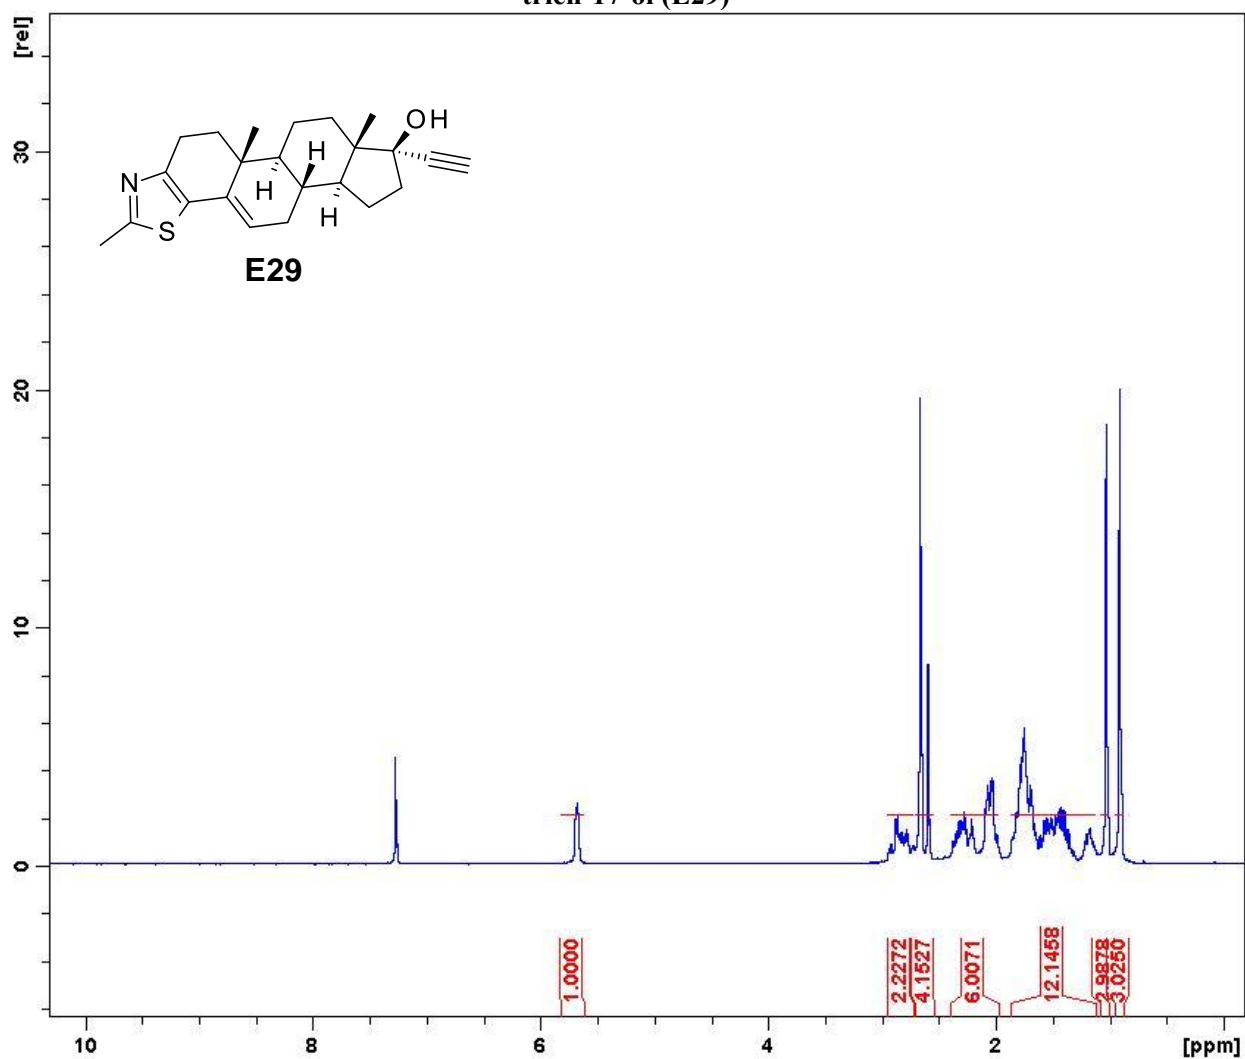

Figure S-61: <sup>1</sup>H NMR spectrum of compound E29 in CDCl<sub>3</sub>

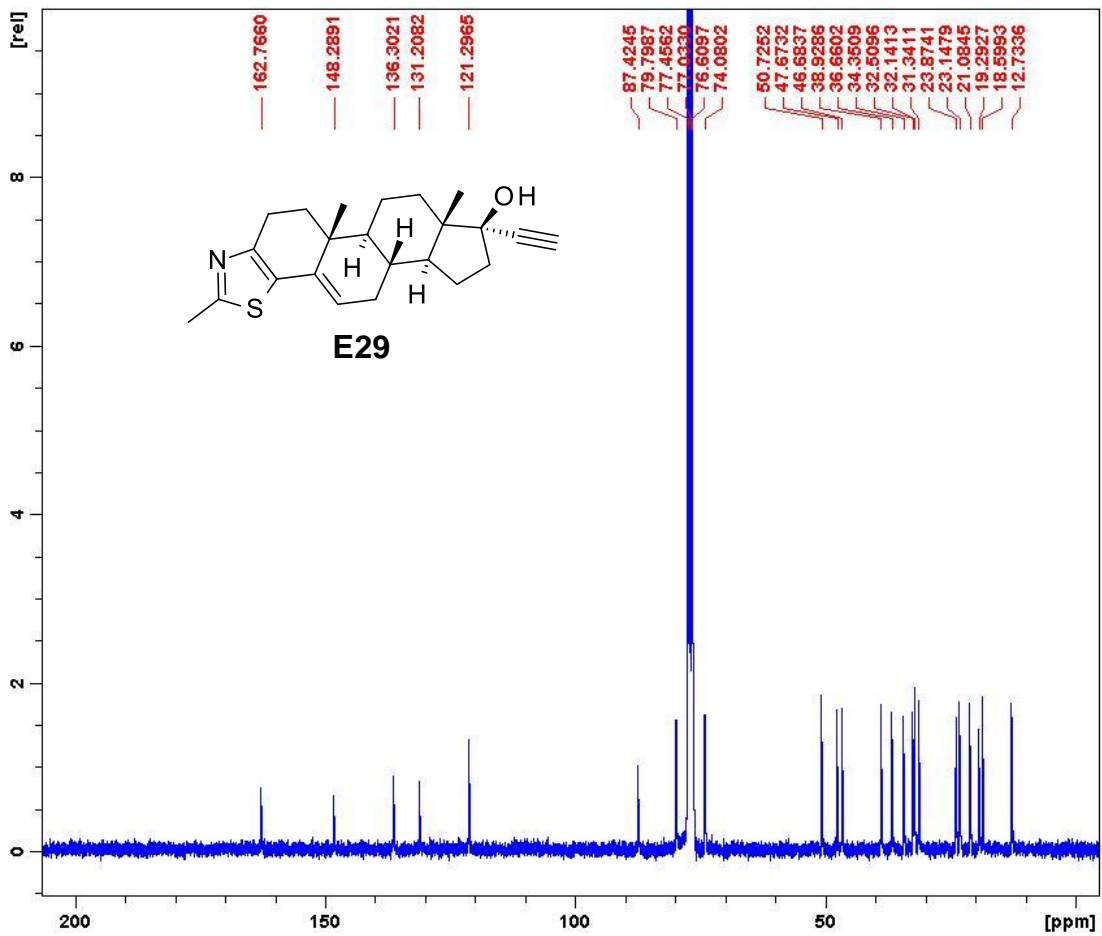

Figure S-62: <sup>13</sup>C NMR spectrum of compound E29 in CDCl<sub>3</sub>

Arkansas Statewide Mass Spectrometry Facility  
ESI high-res Mass Spectrum

Sample Name: E-21  
Sample id#: 5199  
Instrument: Shimadzu IT-TOF

9/20/2023

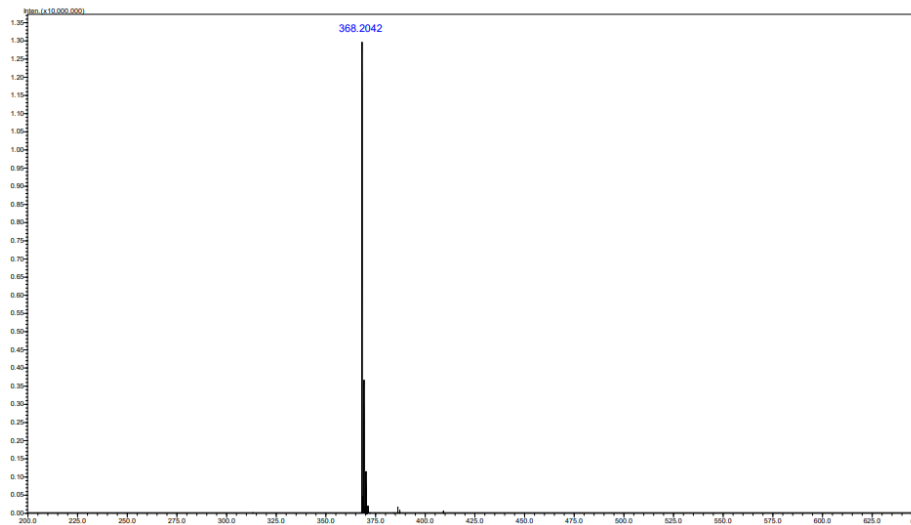

Figure S-63: High-resolution mass spectrum of compound E29

(1*S*,2*R*,13*R*,14*S*,17*R*,18*S*)-17-Ethynyl-2,18-dimethyl-7-(*m*-tolyl)-8-thia-6-azapentacyclo[11.7.0.0<sup>2,10</sup>.0<sup>5,9</sup>.0<sup>14,18</sup>]icosa-5(9),6,10-trien-17-ol (E34)

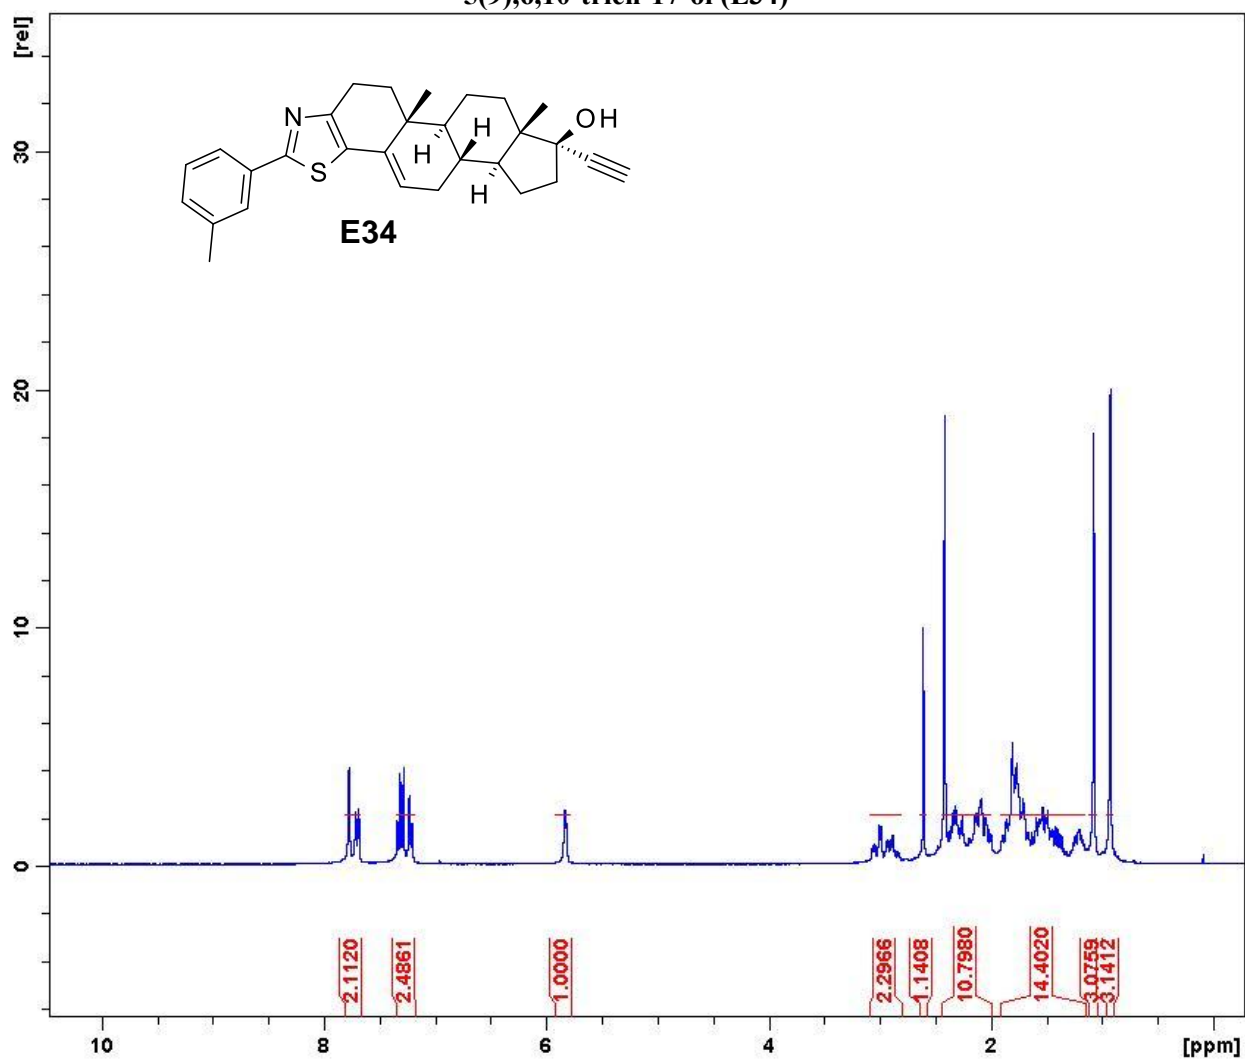

Figure S-64: <sup>1</sup>H NMR spectrum of compound E34 in CDCl<sub>3</sub>

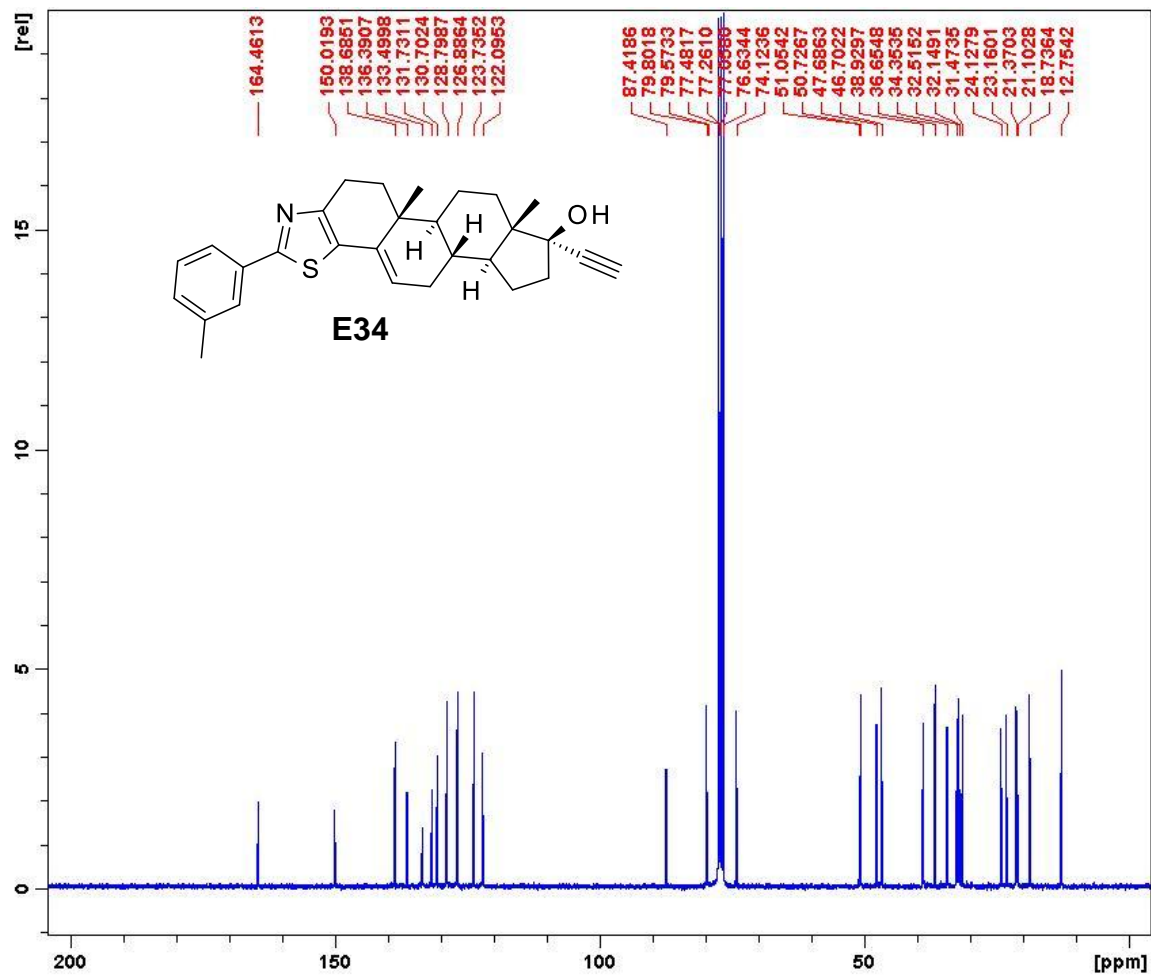

**Figure S-65:**  $^{13}\text{C}$  NMR spectrum of compound **E34** in  $\text{CDCl}_3$

Arkansas Statewide Mass Spectrometry Facility

ESI high-res Mass Spectrum

Sample Name: E-22  
 Sample id#: 5200  
 Instrument: Shimadzu IT-TOF

9/20/2023

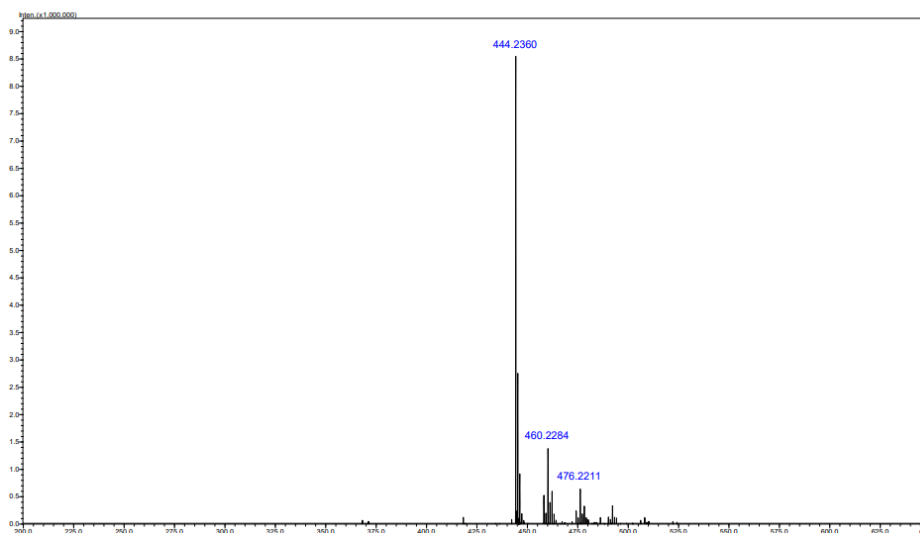

**Figure S-66:** High-resolution mass spectrum of compound **E34**

(1*S*,2*R*,13*R*,14*S*,17*R*,18*S*)-17-Ethynyl-7-(3-methoxyphenyl)-2,18-dimethyl-8-thia-6-azapentacyclo[11.7.0.0<sup>2,10</sup>.0<sup>5,9</sup>.0<sup>14,18</sup>]icosa-5(9),6,10-trien-17-ol (E36)

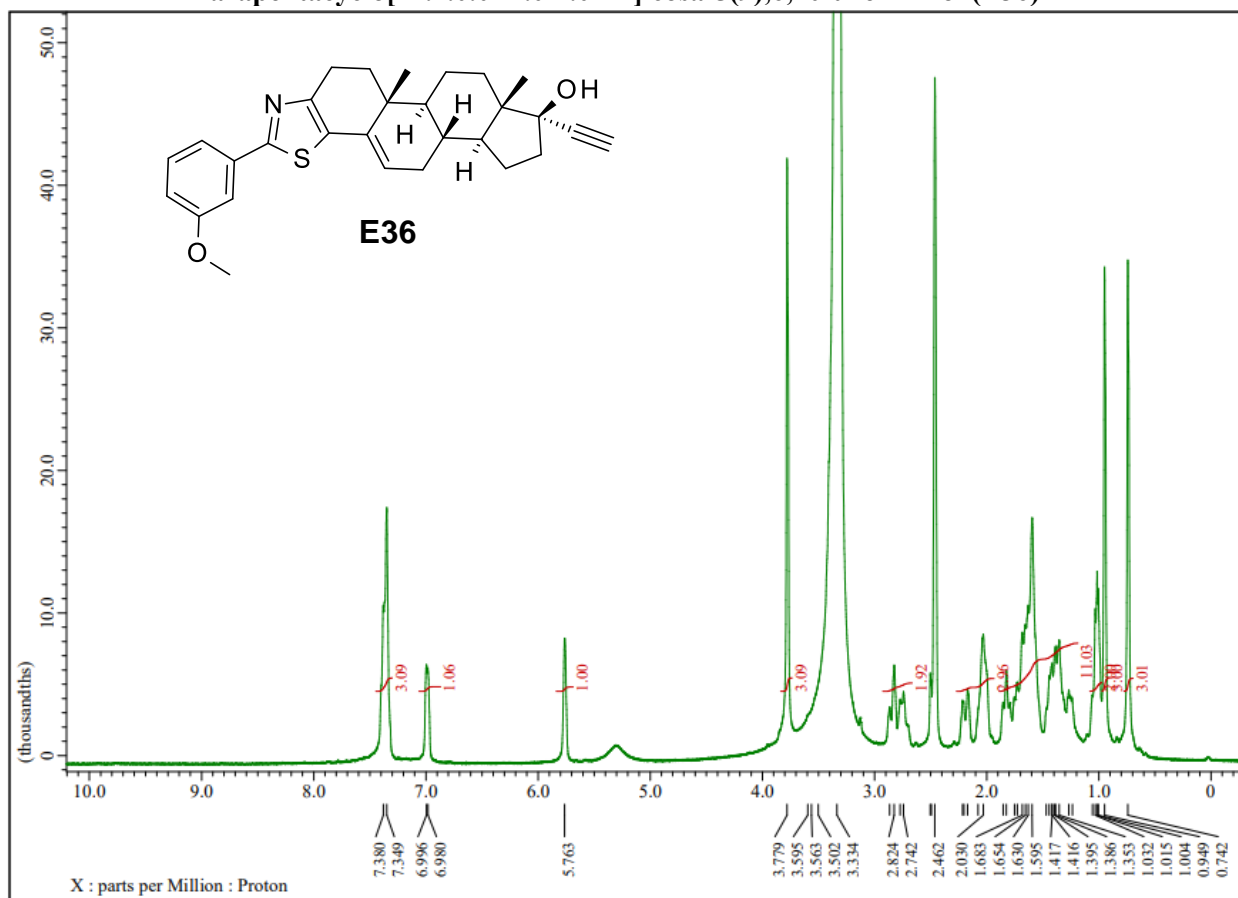

**Figure S-67:** <sup>1</sup>H NMR spectrum of compound **E36** in DMSO-*d*<sub>6</sub>

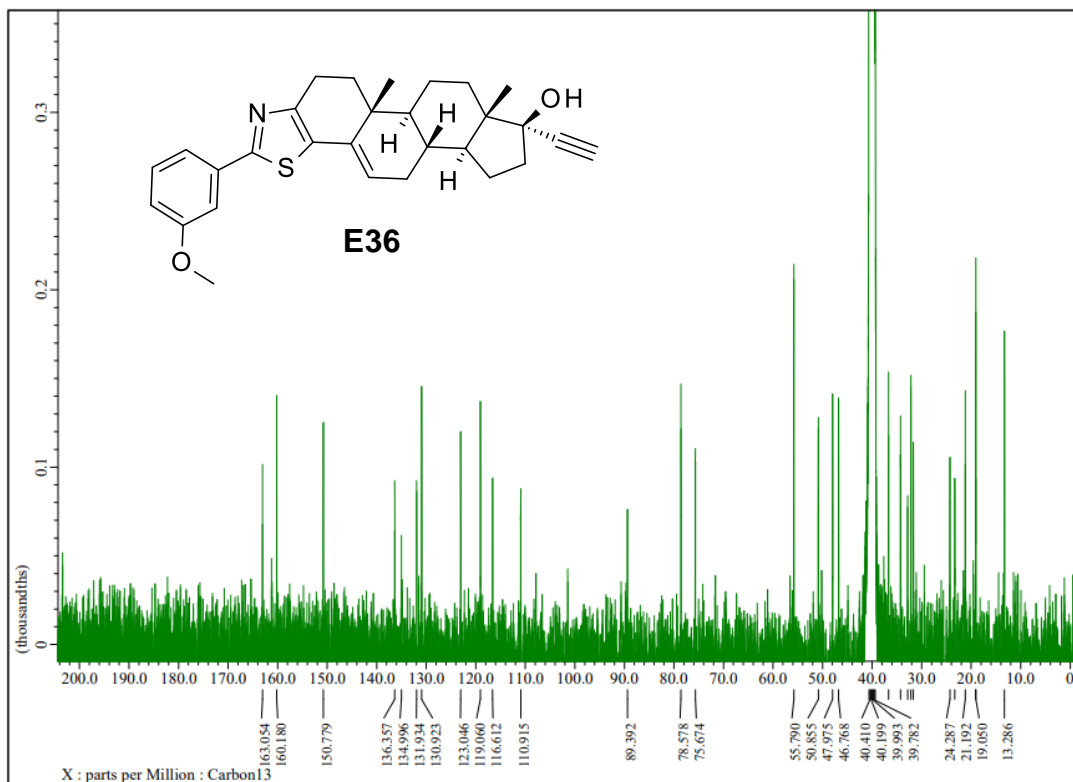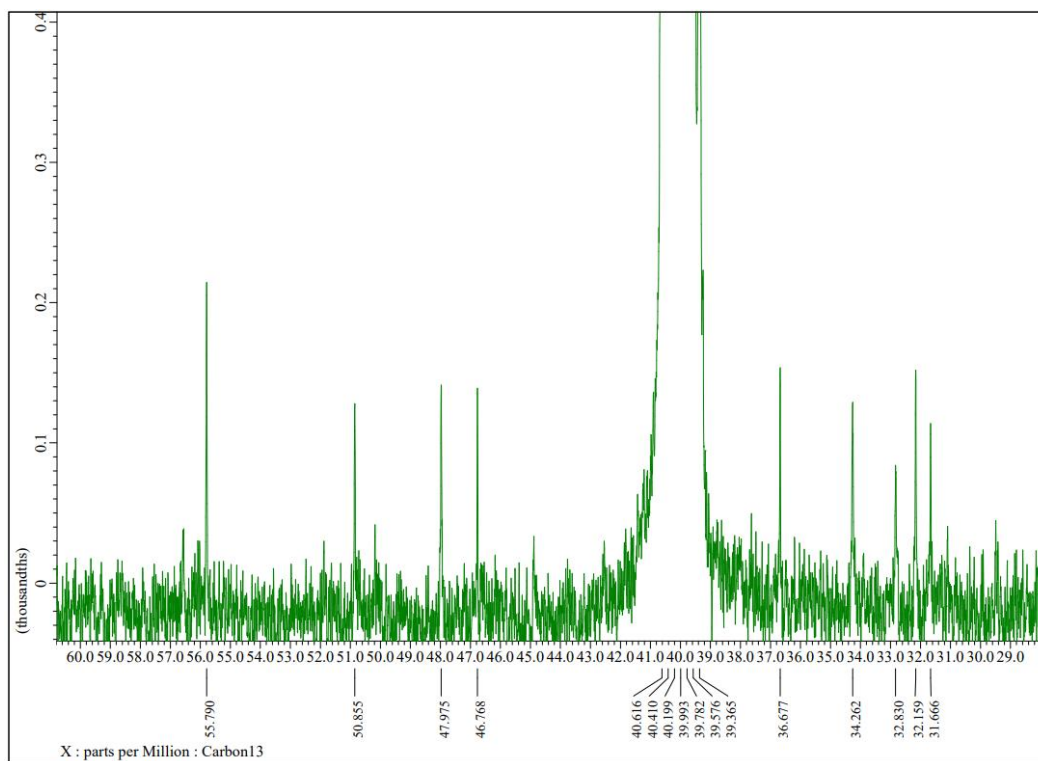

**Figure S-68:**  $^{13}\text{C}$  NMR spectrum of compound **E36** in  $\text{DMSO-}d_6$

Arkansas Statewide Mass Spectrometry Facility

ESI high-res Mass Spectrum

Sample Name: E-23  
Sample id#: 5201  
Instrument: Shimadzu IT-TOF

9/20/2023

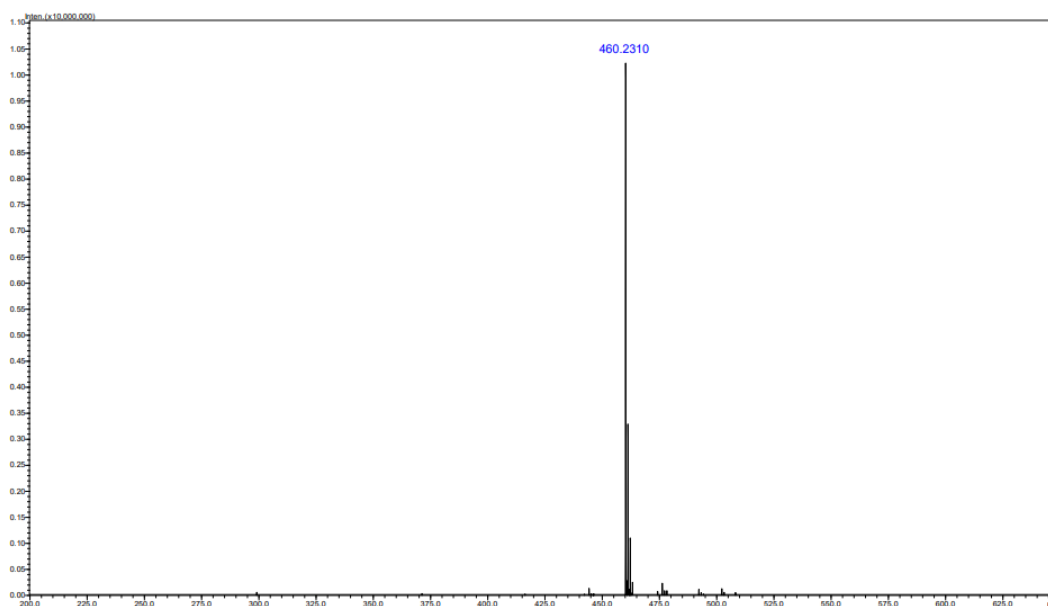

**Figure S-69:** High-resolution mass spectrum of compound **E36**



(1*S*,2*R*,13*R*,14*S*,17*R*,18*S*)-17-Ethynyl-7-(4-fluorophenyl)-2,18-dimethyl-8-thia-6-azapentacyclo[11.7.0.0<sup>2,10</sup>.0<sup>5,9</sup>.0<sup>14,18</sup>]icosa-5(9),6,10-trien-17-ol (E41)

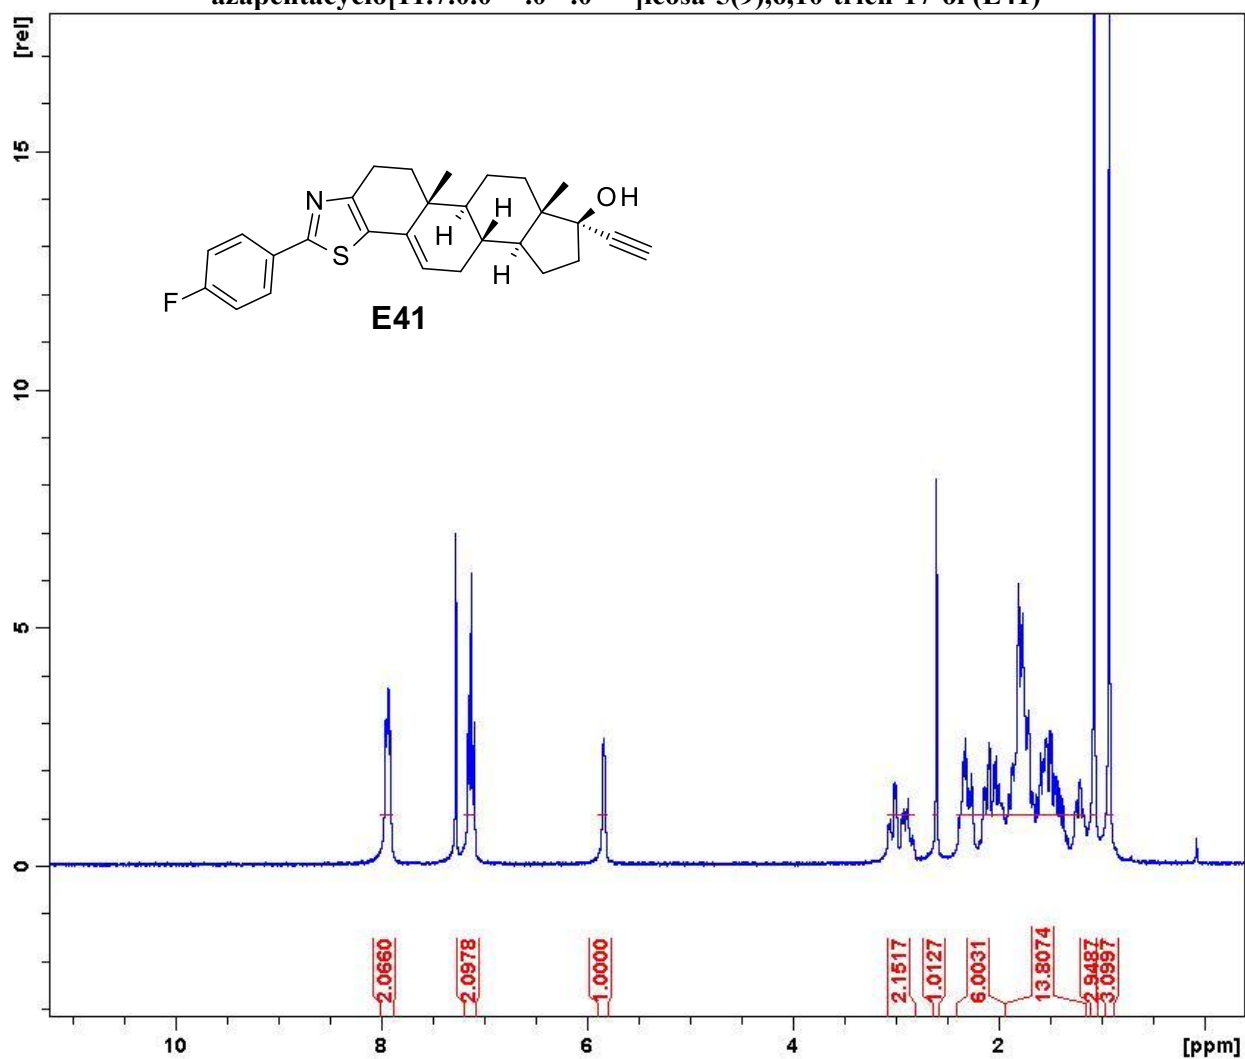

Figure S-70: <sup>1</sup>H NMR spectrum of compound E41 in CDCl<sub>3</sub>

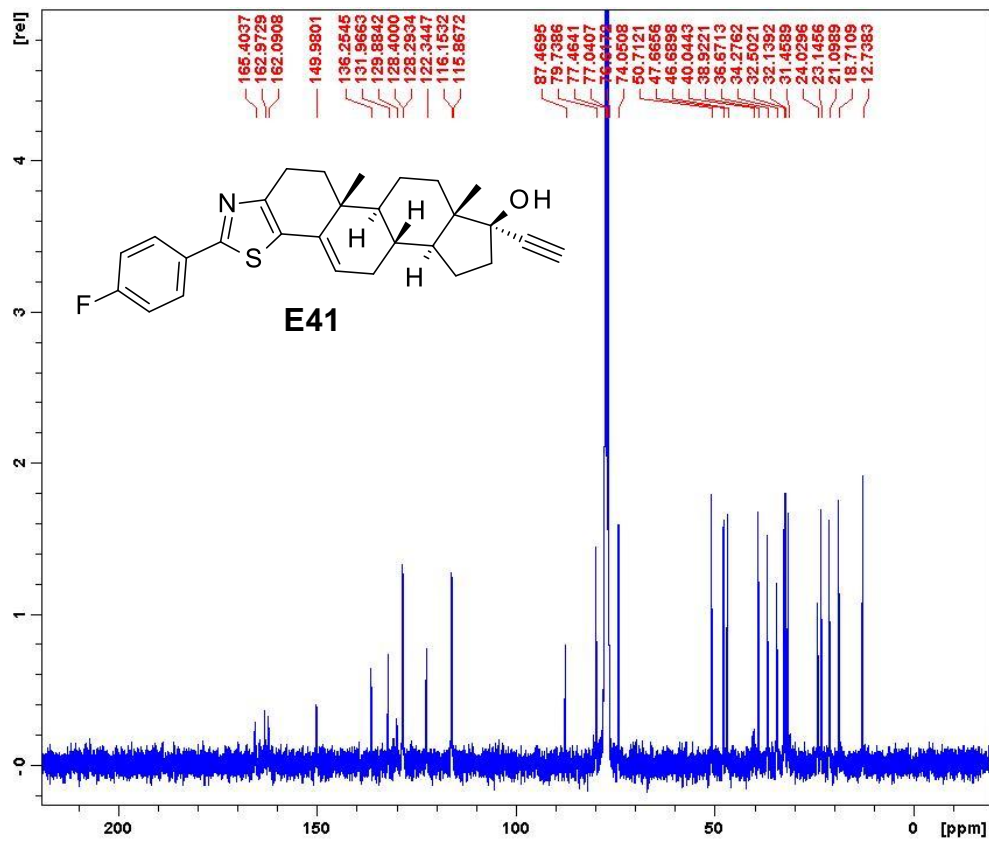

**Figure S-71:** <sup>13</sup>C NMR spectrum of compound **E41** in CDCl<sub>3</sub>

Arkansas Statewide Mass Spectrometry Facility

ESI high-res Mass Spectrum

Sample Name: E-24  
 Sample id#: 5202  
 Instrument: Shimadzu IT-TOF

9/20/2023

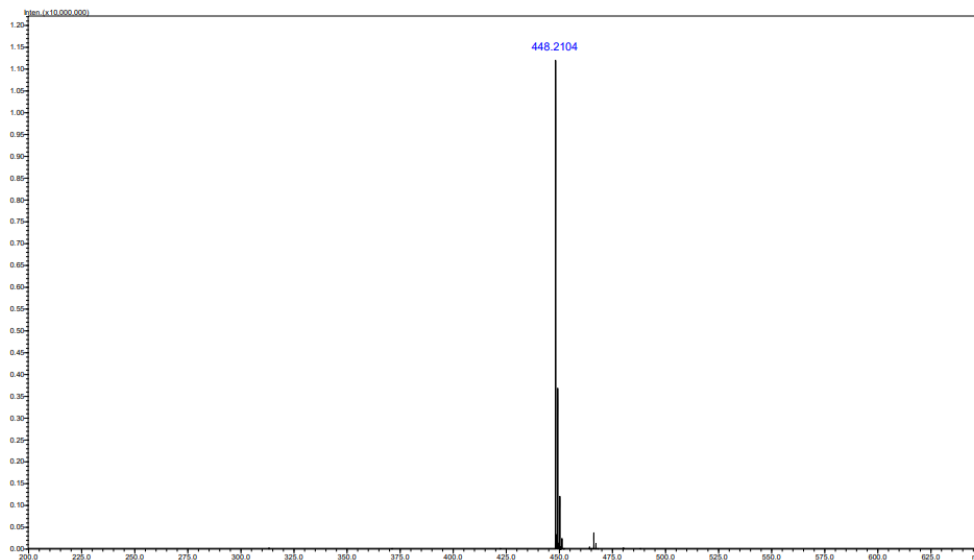

**Figure S-72:** High-resolution mass spectrum of compound **E41**

(1*S*,2*R*,13*R*,14*S*,17*R*,18*S*)-7-(3-Chlorophenyl)-17-ethynyl-2,18-dimethyl-8-thia-  
azapentacyclo[11.7.0.0<sup>2,10</sup>.0<sup>5,9</sup>.0<sup>14,18</sup>]icosa-5(9),6,10-trien-17-ol (E43)

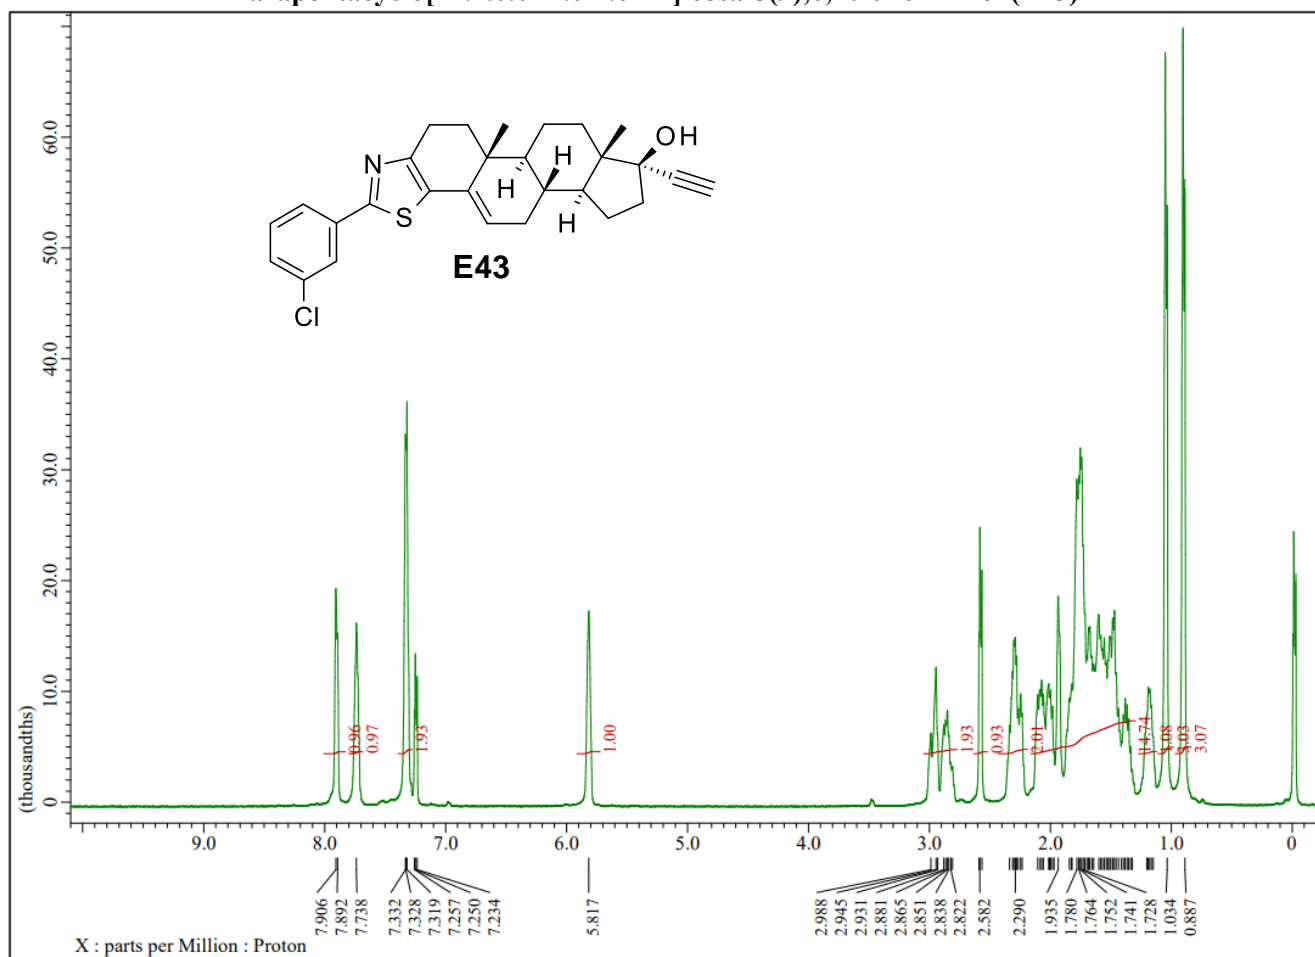

Figure S-73: <sup>1</sup>H NMR spectrum of compound E43 in CDCl<sub>3</sub>

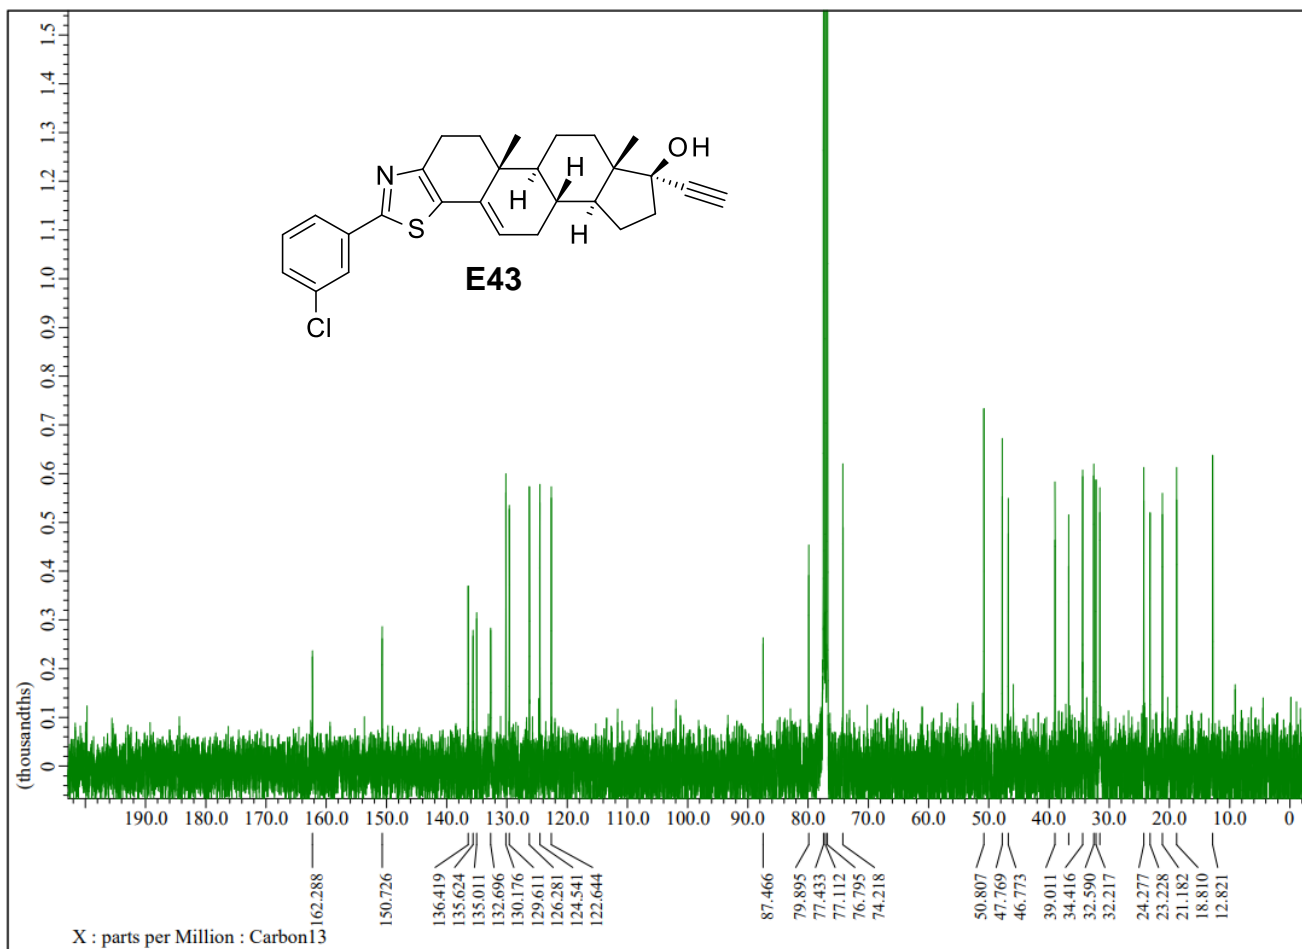

**Figure S-74:** <sup>13</sup>C NMR spectrum of compound **E43** in CDCl<sub>3</sub>

(1*S*,2*R*,13*R*,14*S*,17*R*,18*S*)-7-(4-Bromophenyl)-17-ethynyl-2,18-dimethyl-8-thia-6-azapentacyclo[11.7.0.0<sup>2,10</sup>.0<sup>5,9</sup>.0<sup>14,18</sup>]icosa-5(9),6,10-trien-17-ol (E44)

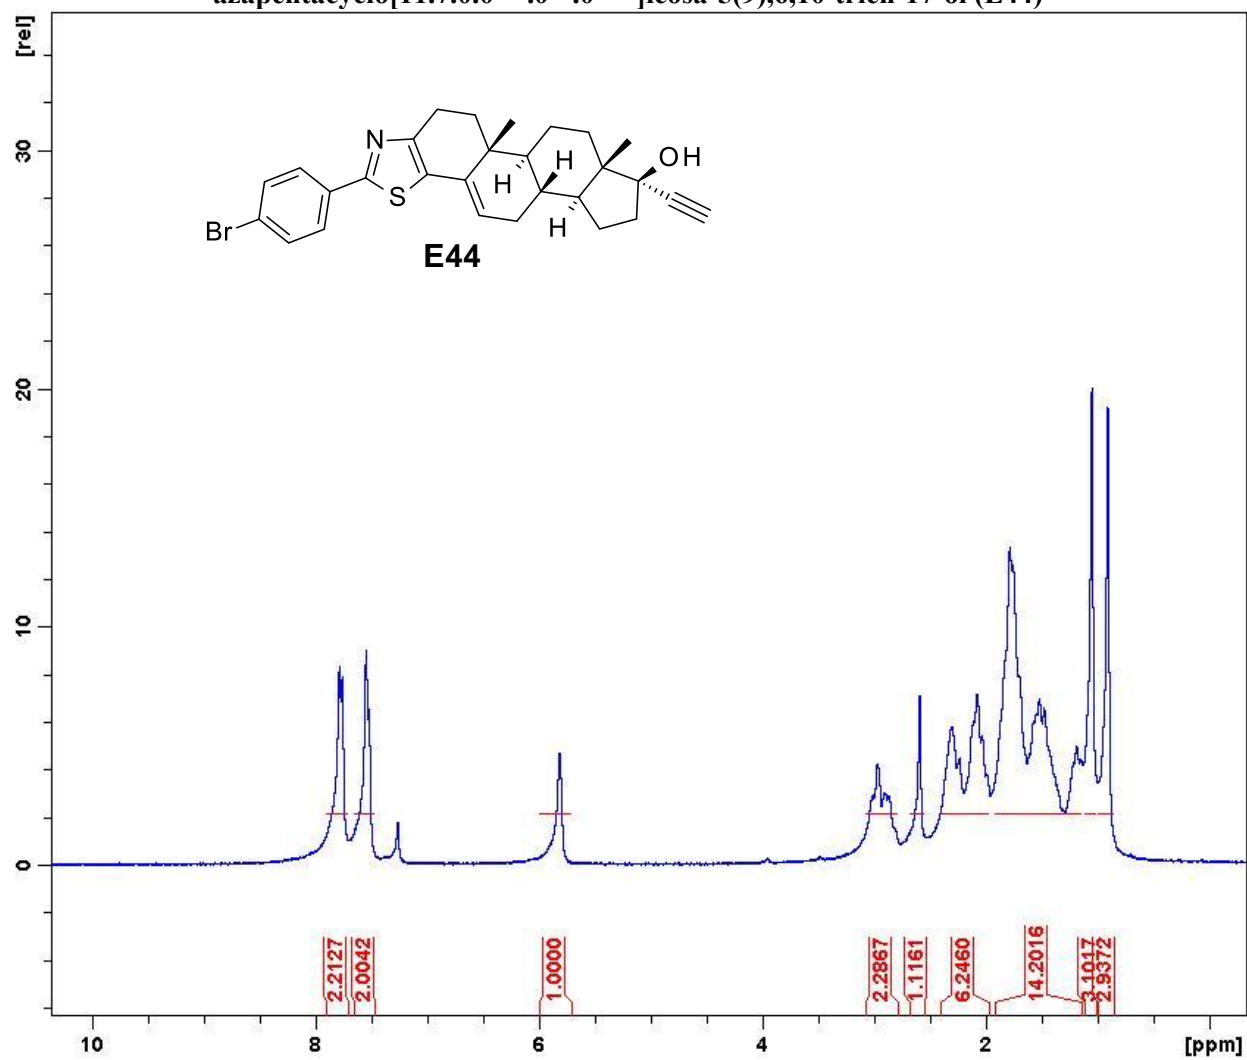

Figure S-75: <sup>1</sup>H NMR spectrum of compound E44 in CDCl<sub>3</sub>

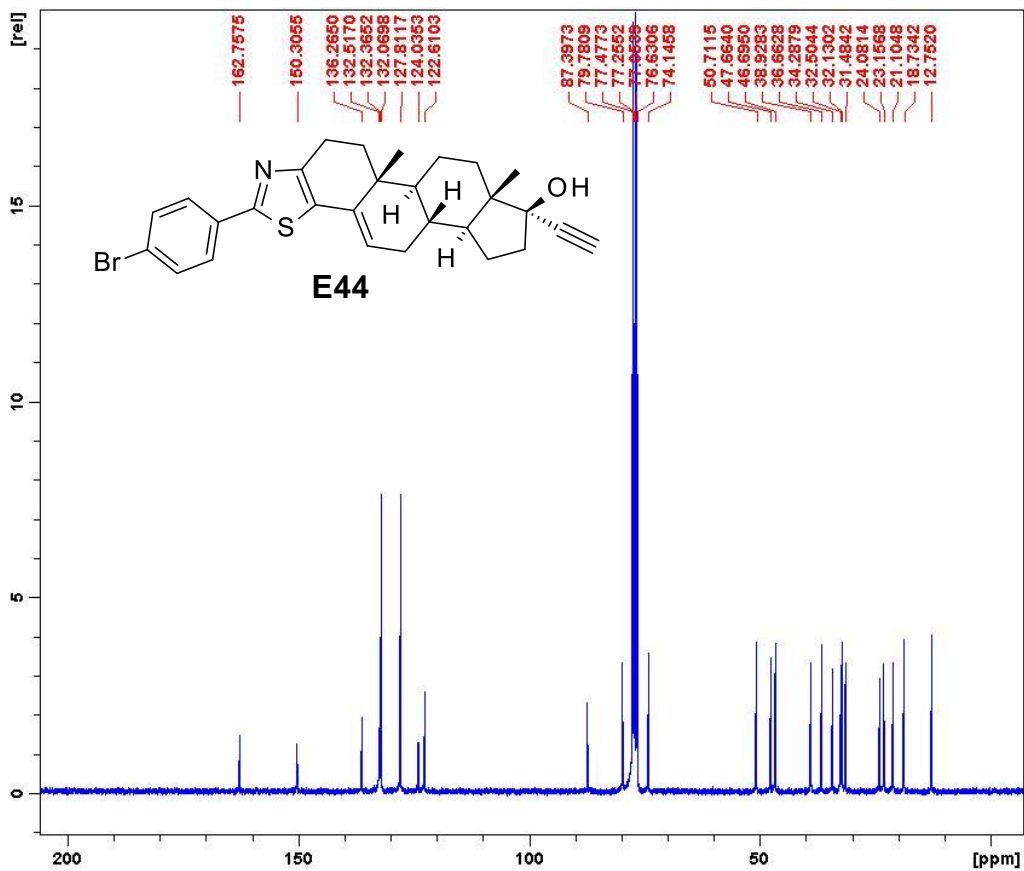

Figure S-76: <sup>13</sup>C NMR spectrum of compound E44 in CDCl<sub>3</sub>

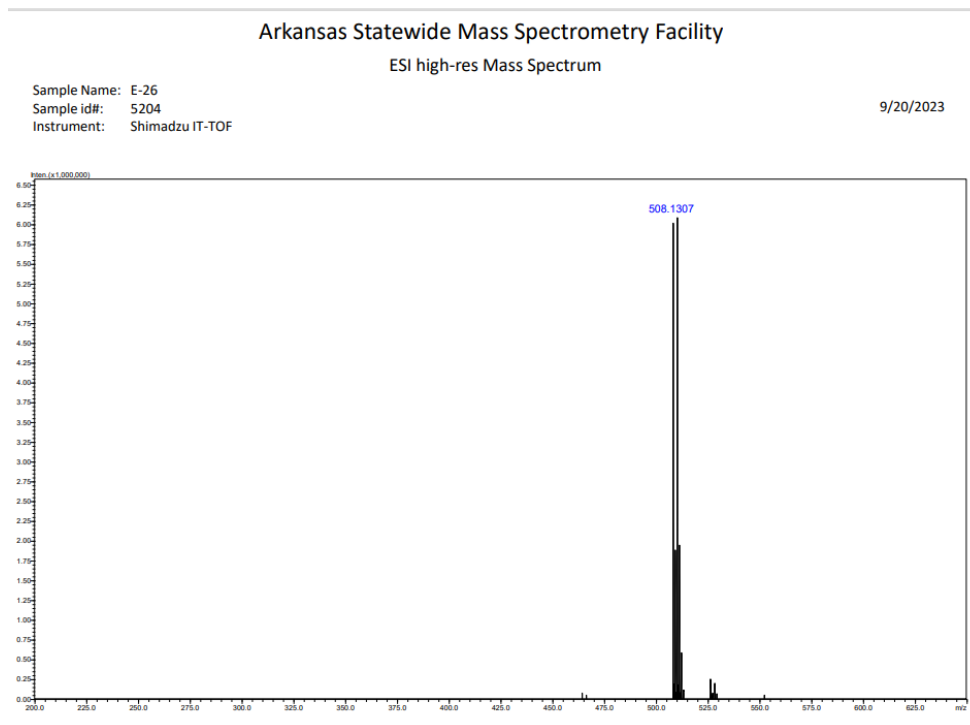

Arkansas Statewide Mass Spectrometry Facility

ESI high-res Mass Spectrum

Sample Name: E-26

Sample id#: 5204

Instrument: Shimadzu IT-TOF

9/20/2023

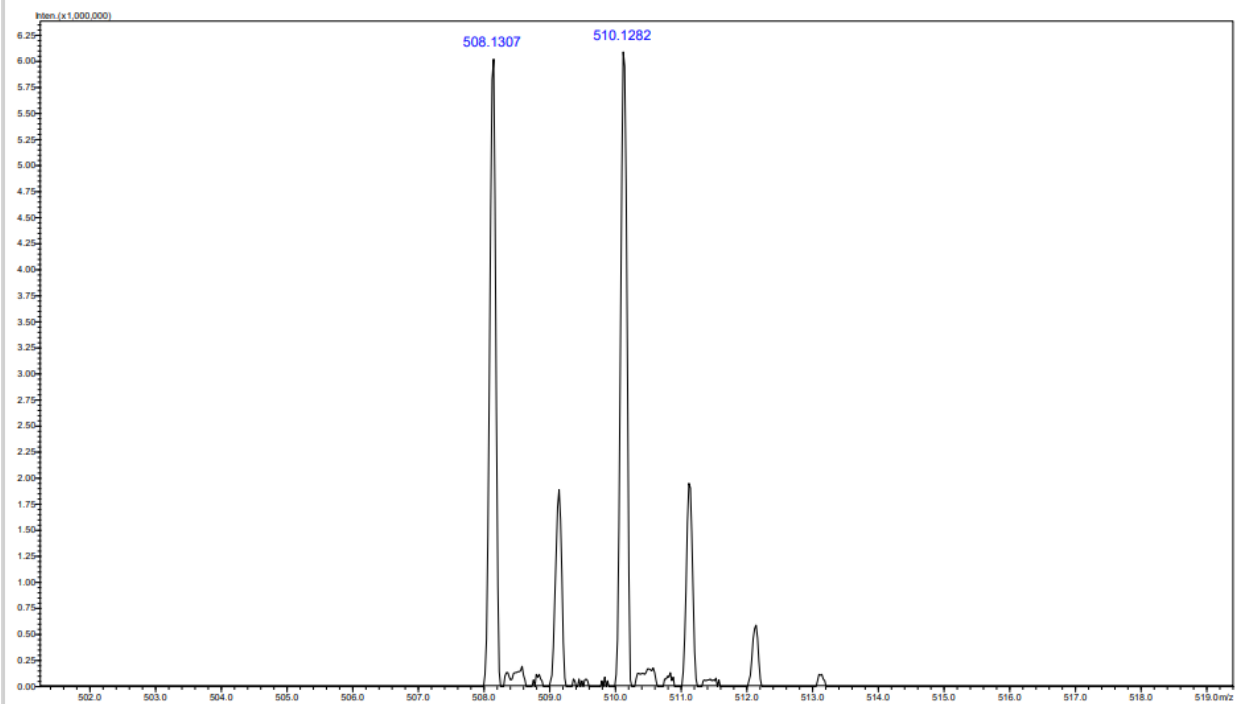

Figure S-77: High-resolution mass spectrum of compound E44

(1*S*,2*R*,13*R*,14*S*,17*R*,18*S*)-7-(1,3-Benzodioxol-5-yl)-17-ethynyl-2,18-dimethyl-8-thia-6-azapentacyclo[11.7.0.0<sup>2,10</sup>.0<sup>5,9</sup>.0<sup>14,18</sup>]icosa-5(9),6,10-trien-17-ol (E46)

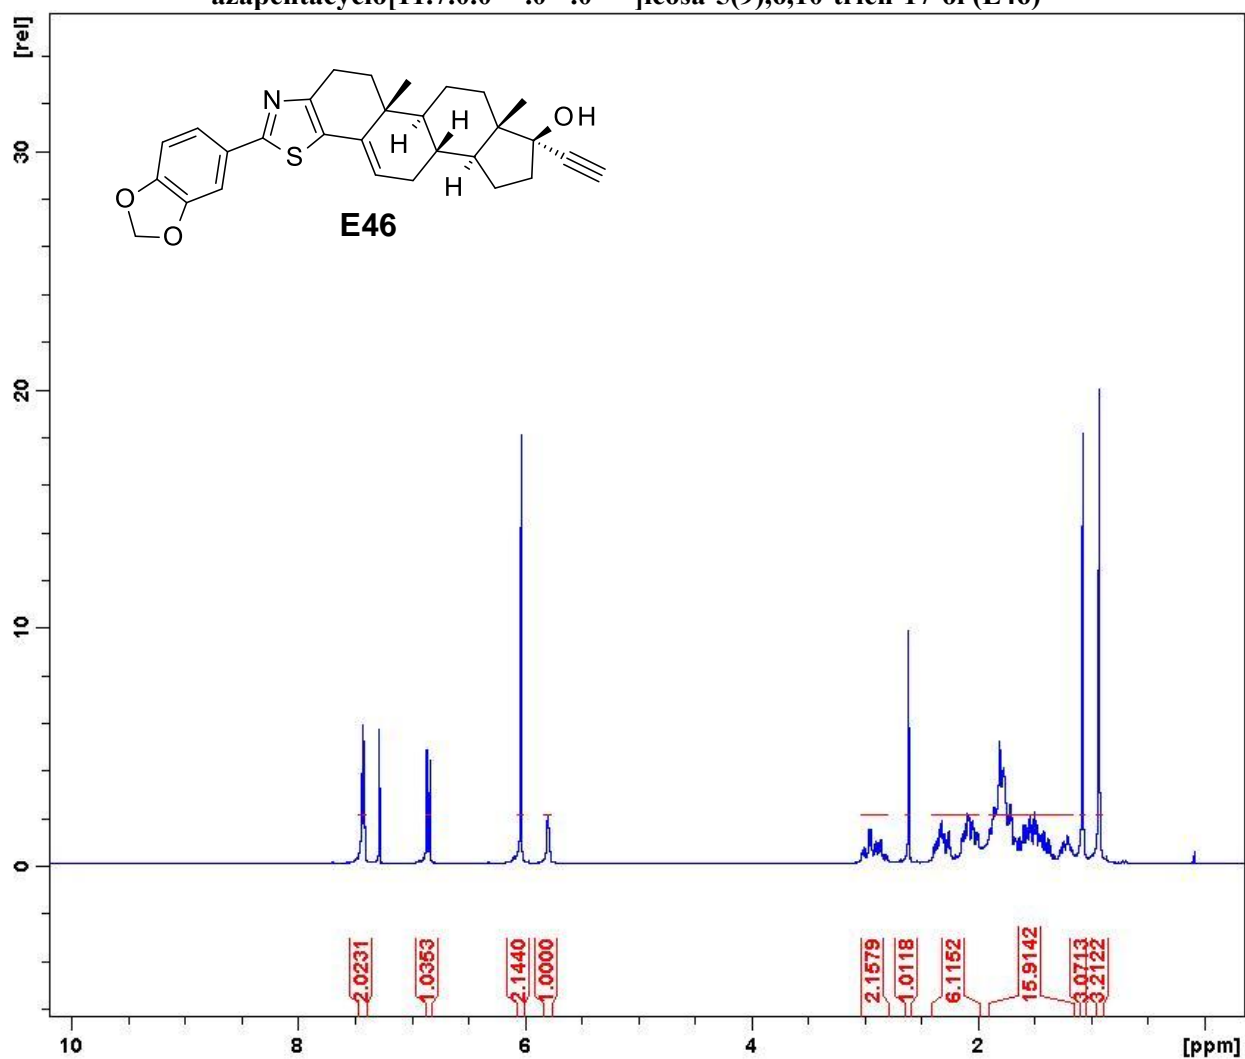

Figure S-78: <sup>1</sup>H NMR spectrum of compound E46 in CDCl<sub>3</sub>



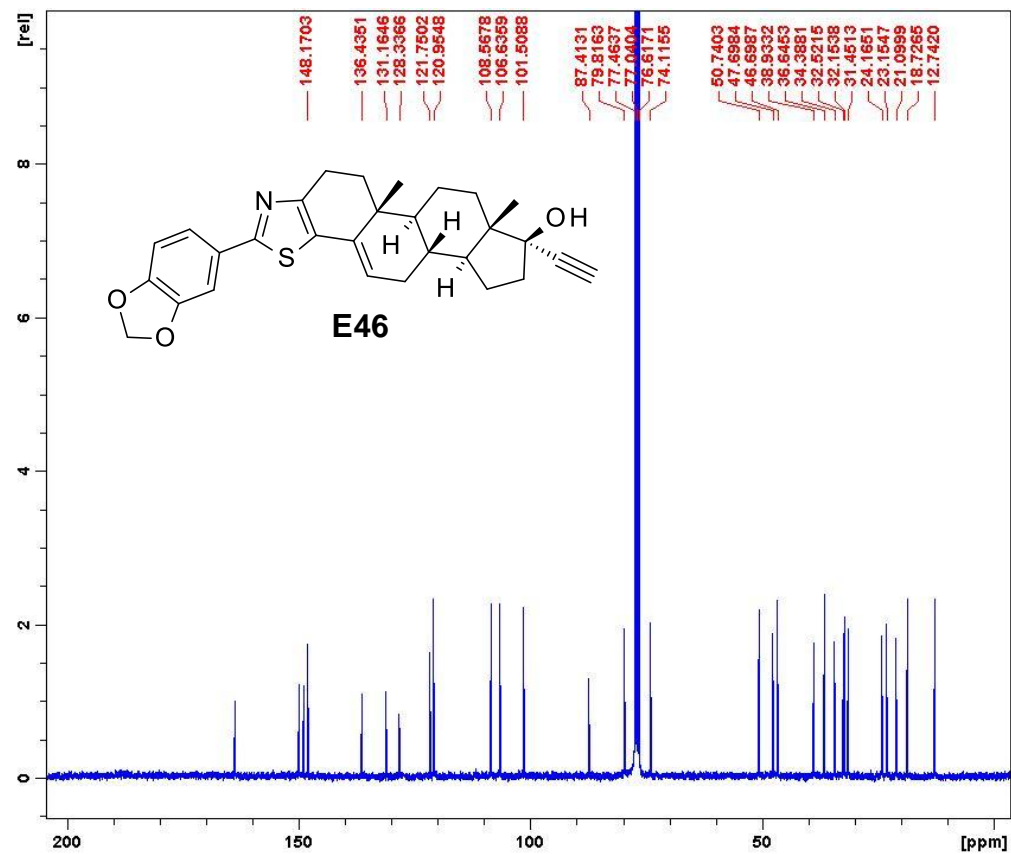

**Figure S-79:** <sup>13</sup>C NMR spectrum of compound **E46** in CDCl<sub>3</sub>

Arkansas Statewide Mass Spectrometry Facility

ESI high-res Mass Spectrum

Sample Name: E-27  
 Sample id#: 5205  
 Instrument: Shimadzu IT-TOF

9/20/2023

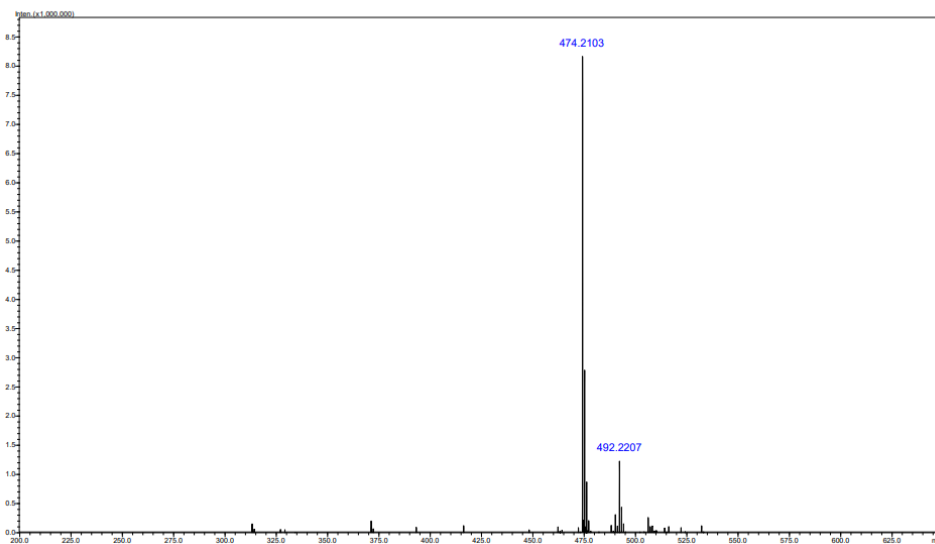

**Figure S-80:** High-resolution mass spectrum of compound **E46**

4-[(1*S*,2*R*,13*R*,14*S*,17*R*,18*S*)-17-Ethynyl-17-hydroxy-2,18-dimethyl-8-thia-6-azapentacyclo[11.7.0.0<sup>2,10</sup>.0<sup>5,9</sup>.0<sup>14,18</sup>]icosa-5(9),6,10-trien-7-yl]benzene-1,2-diol (E47)

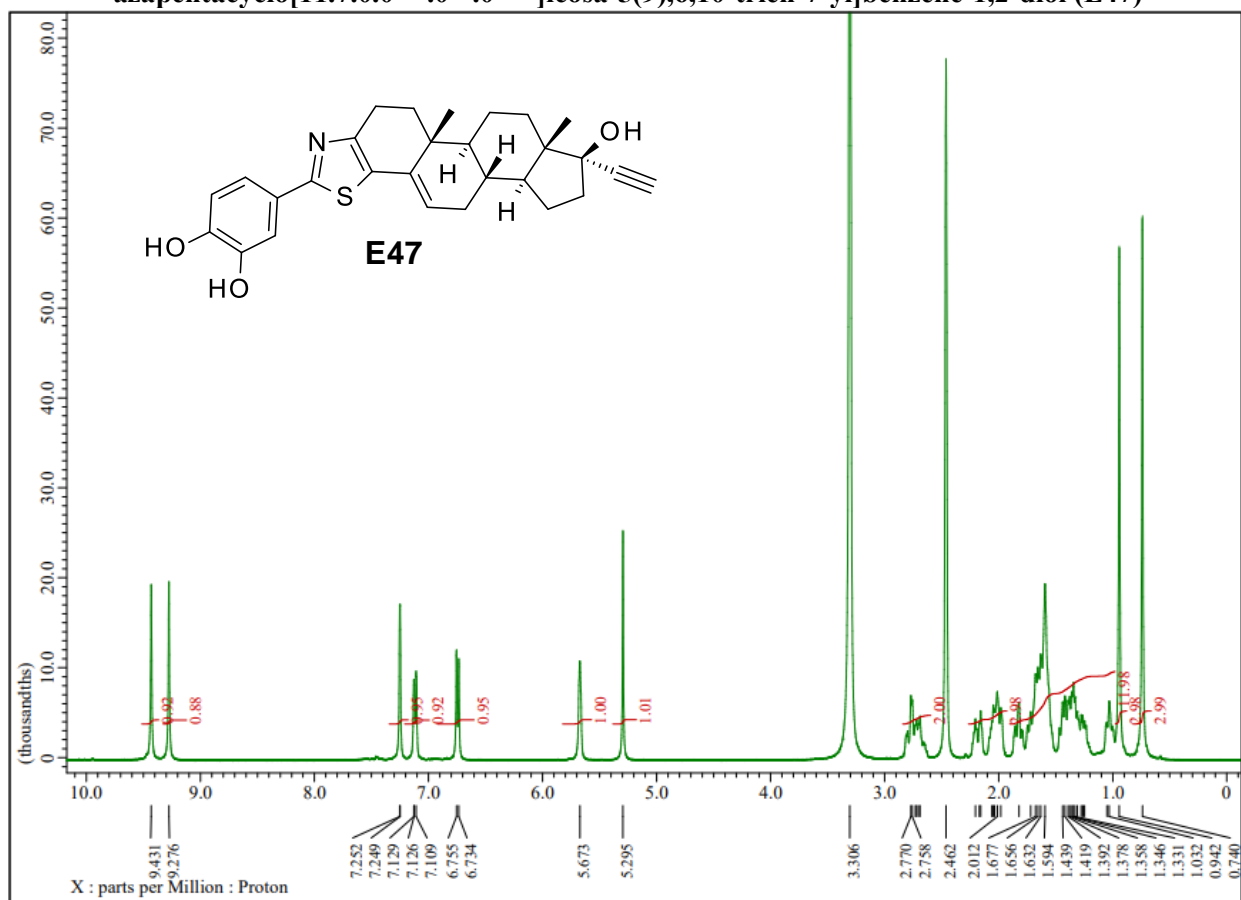

Figure S-81: <sup>1</sup>H NMR spectrum of compound E47 in DMSO-*d*<sub>6</sub>

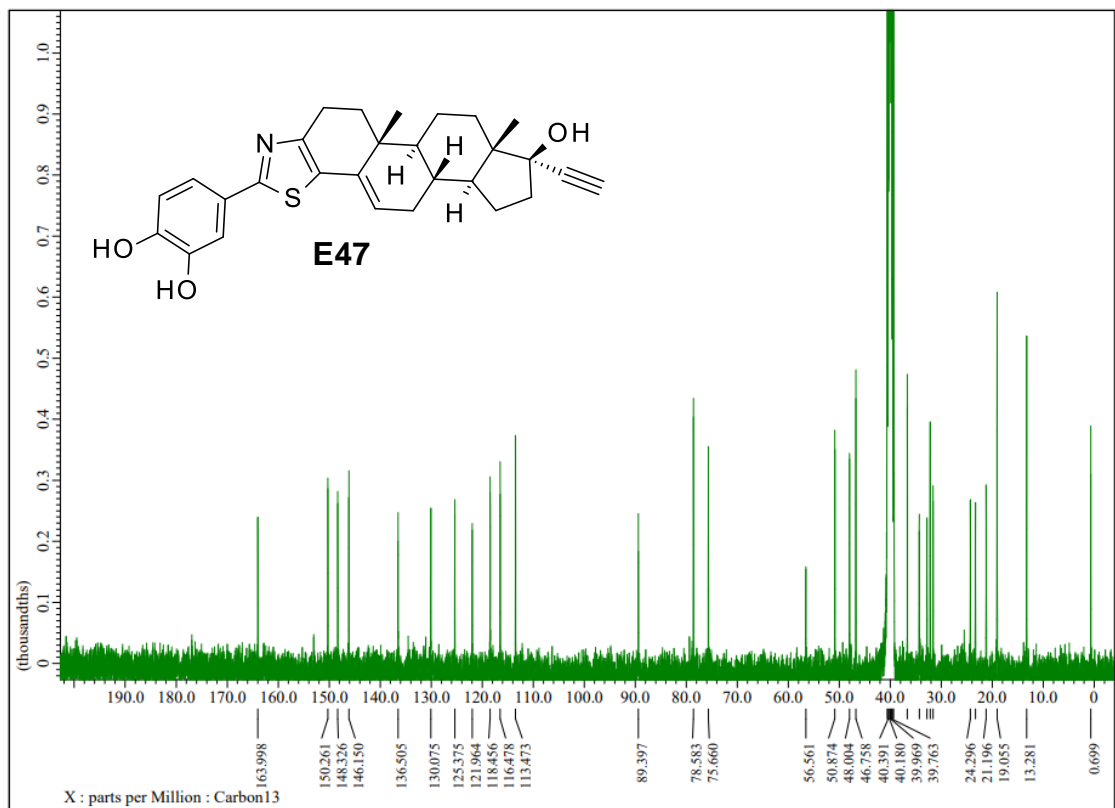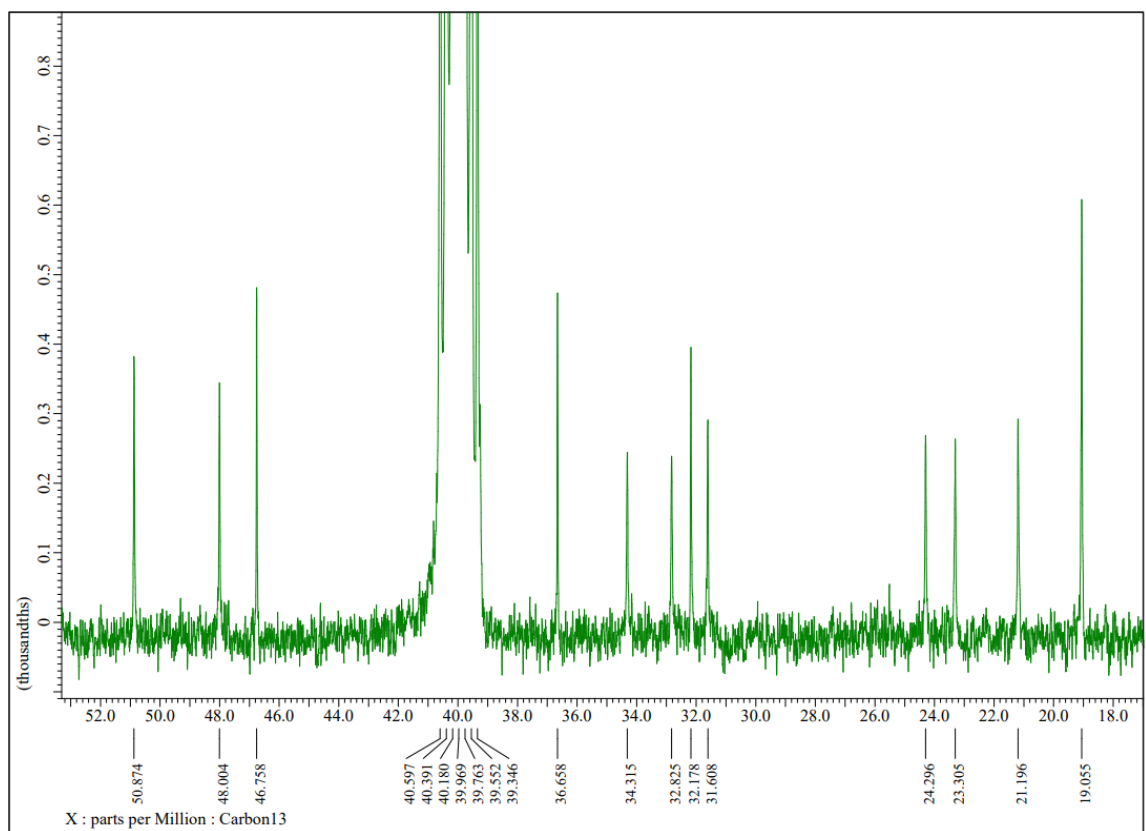

**Figure S-82:**  $^{13}\text{C}$  NMR spectrum of compound **E47** in  $\text{DMSO-}d_6$

Arkansas Statewide Mass Spectrometry Facility

ESI high-res Mass Spectrum

Sample Name: E-28  
Sample id#: S206  
Instrument: Shimadzu IT-TOF

9/20/2023

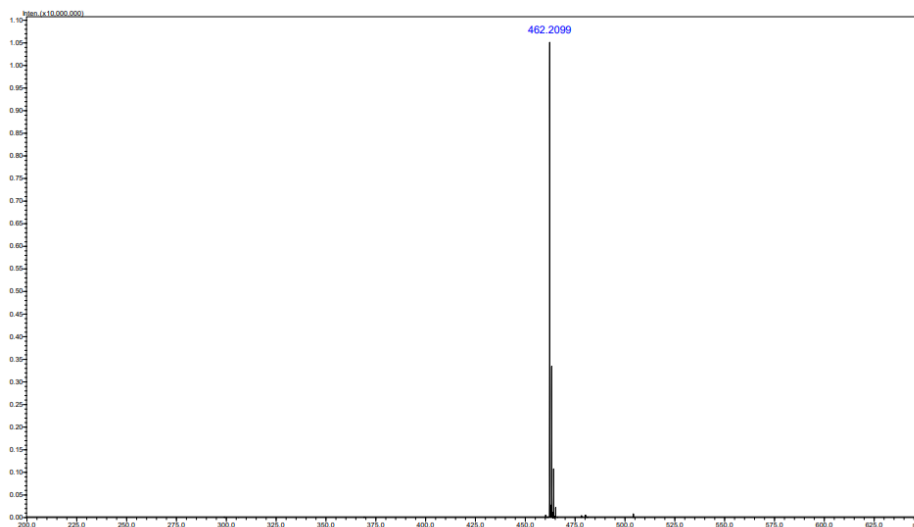

Figure S-83: High-resolution mass spectrum of compound E47

(1*S*,2*R*,13*R*,14*S*,17*R*,18*S*)-17-Ethynyl-2,18-dimethyl-7-(4-pyridyl)-8-thia-6-azapentacyclo[11.7.0.0<sup>2,10</sup>.0<sup>5,9</sup>.0<sup>14,18</sup>]icosa-5(9),6,10-trien-17-ol (E50)

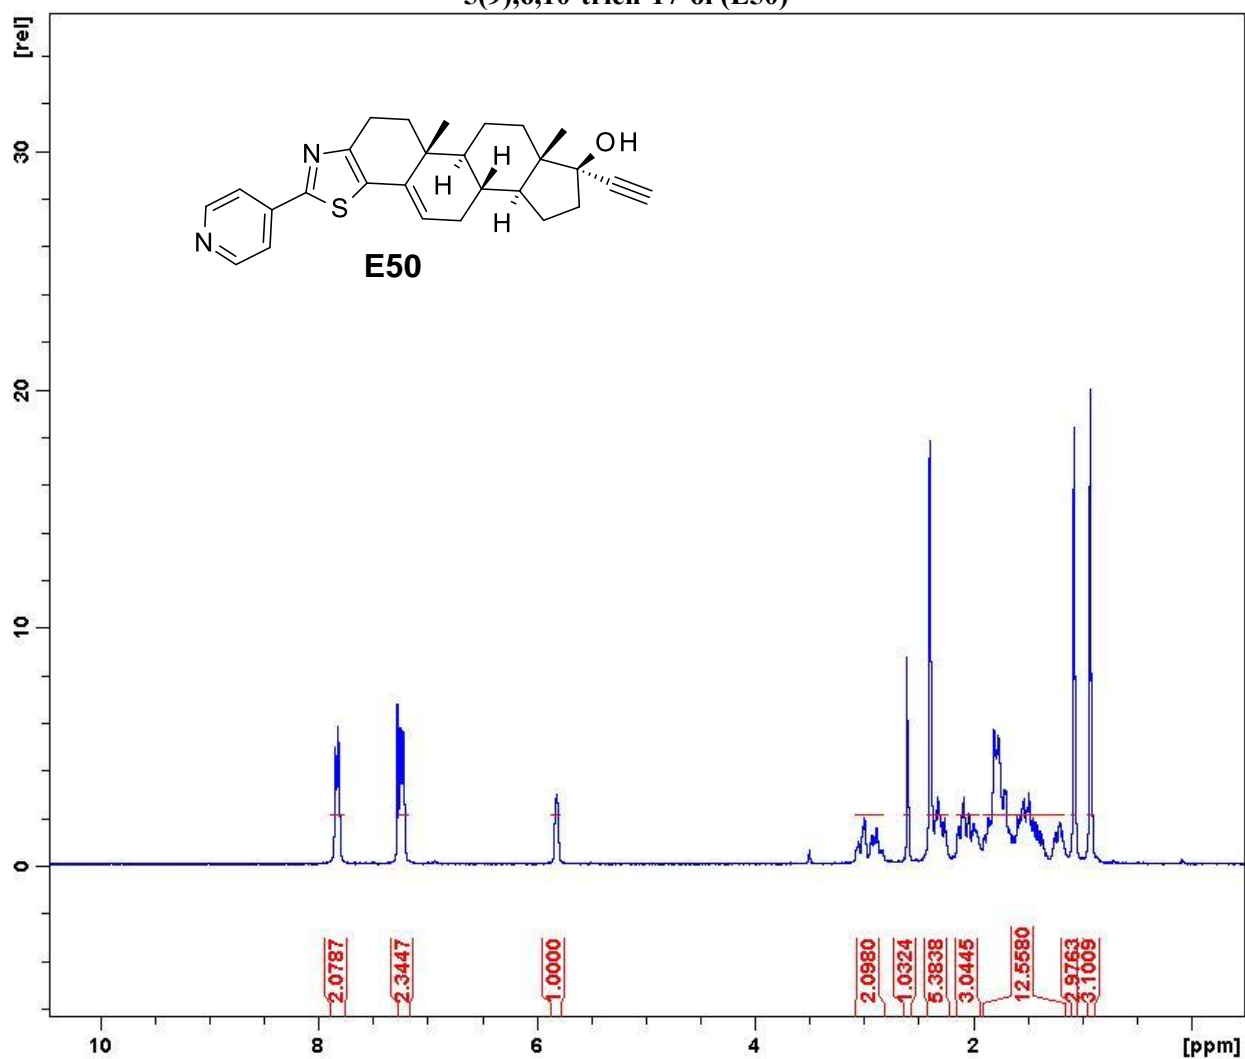

Figure S-84: <sup>1</sup>H NMR spectrum of compound E50 in CDCl<sub>3</sub>

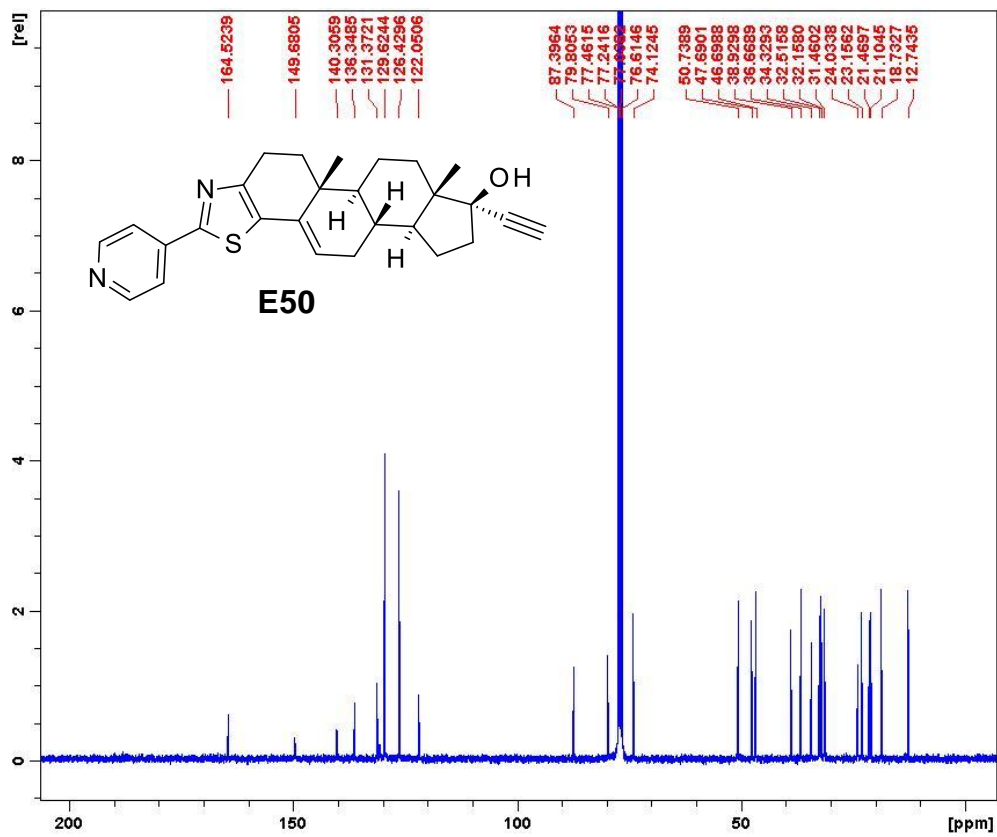

**Figure S-85:**  $^{13}\text{C}$  NMR spectrum of compound **E50** in  $\text{CDCl}_3$

Arkansas Statewide Mass Spectrometry Facility

ESI Mass Spectrum

Sample Name: E-2  
 Sample id#: 5258  
 Instrument: Shimadzu IT-TOF

11/8/2023

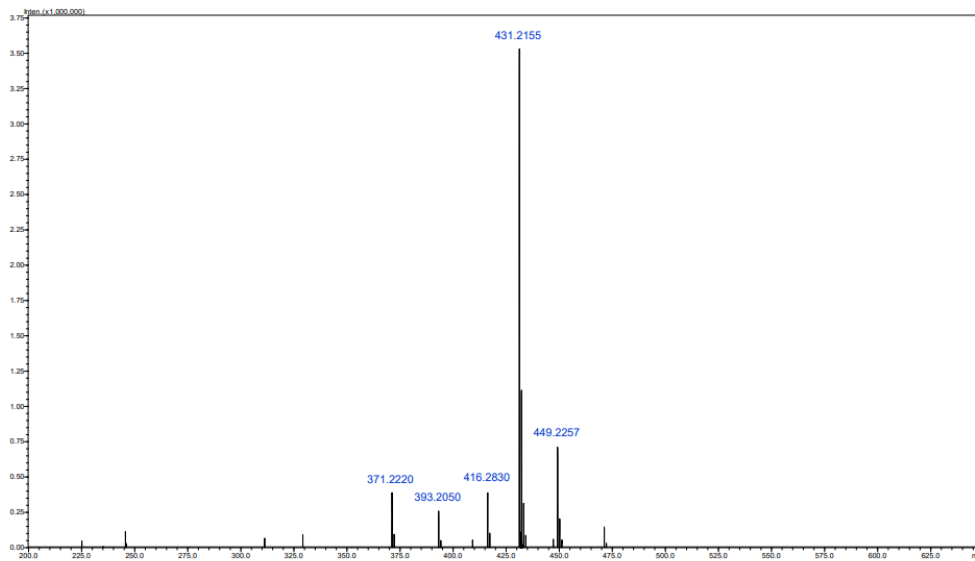

**Figure S-86:** High-resolution mass spectrum of compound **E50**
