# Supplementary material for: Thiazole-fused androstenone and ethisterone derivatives: potent β- and γ-actin cytoskeleton inhibitors to treat melanoma tumors
Source: Royal Society of Chemistry journal article supplement (doi:10.1039/d4md00719k), 2024-12-06
Supplement: d4md00719k2.xlsx [file d4md00719k2.xlsx]

## Sheet: DEG_RNA SEQ_E28 vs NC
Gene name	Log2FC	P value					P
ENSG00000064300	-0.99551	3.30355e-07
ENSG00000074416	-0.878995	9.52888e-09
ENSG00000130600	-0.866932	7.74819e-06
ENSG00000159388	-0.739	5.34826e-09
ENSG00000105559	-0.723331	3.18506e-14
ENSG00000104368	-0.712202	3.35274e-28
ENSG00000075399	-0.705	0.00034502
ENSG00000135074	-0.68185	1.66865e-12
ENSG00000168453	-0.678758	7.69284e-08
ENSG00000117289	-0.649803	5.01861e-07
ENSG00000172893	-0.649005	5.30207e-20
ENSG00000135437	-0.633252	0.000211053
ENSG00000167552	-0.628155	3.1618e-18
ENSG00000260727	-0.6041	0.000189563
ENSG00000163599	-0.601834	0.000553507
ENSG00000112972	-0.58791	2.87856e-13
ENSG00000163273	-0.586711	0.00045726
ENSG00000178445	-0.584763	3.83361e-10
ENSG00000177606	-0.572438	2.68161e-07
ENSG00000140522	-0.571904	5.42272e-08
ENSG00000182871	-0.564844	0.000138297
ENSG00000038427	-0.551322	9.26524e-05
ENSG00000257743	-0.533369	0.000133757
ENSG00000272772	-0.528721	0.0012022
ENSG00000108106	-0.524572	5.01383e-08
ENSG00000110921	-0.519607	2.27999e-07
ENSG00000099974	-0.519251	9.3446e-06
ENSG00000167487	-0.511758	0.00157019
ENSG00000243449	-0.50465	0.0026073
ENSG00000258947	-0.495792	2.12525e-16
ENSG00000124126	-0.493689	1.36113e-08
ENSG00000164180	0.490548	7.2086e-05
ENSG00000159593	0.493523	1.37431e-05
ENSG00000073150	0.497101	1.35202e-08
ENSG00000115540	0.497376	1.62125e-05
ENSG00000108932	0.500727	2.93717e-07
ENSG00000144840	0.50079	0.00011905
ENSG00000092439	0.501084	9.29649e-06
ENSG00000103888	0.501679	5.49212e-07
ENSG00000133739	0.501753	0.000492308
ENSG00000145817	0.502513	9.21146e-12
ENSG00000138041	0.503344	7.318e-05
ENSG00000254708	0.50439	0.000493331
ENSG00000168701	0.505793	2.31528e-10
ENSG00000121542	0.505903	3.13413e-08
ENSG00000228212	0.508176	0.00125393
ENSG00000172716	0.509027	1.64727e-06
ENSG00000100567	0.510358	2.46496e-07
ENSG00000179222	0.51182	1.10241e-22
ENSG00000265182	0.512042	0.00153061
ENSG00000165169	0.516969	7.43667e-05
ENSG00000076356	0.517406	1.51531e-05
ENSG00000104047	0.518349	0.00249898
ENSG00000213090	0.518638	0.000757201
ENSG00000129083	0.521114	6.11099e-16
ENSG00000205707	0.52358	0.000521378
ENSG00000087502	0.53758	3.81198e-06
ENSG00000163376	0.538079	0.000171658
ENSG00000119729	0.54142	1.75748e-09
ENSG00000117620	0.543952	0.000302216
ENSG00000138381	0.546849	1.91999e-06
ENSG00000150961	0.548428	2.67679e-14
ENSG00000130733	0.55295	8.57744e-13
ENSG00000145740	0.554428	1.65356e-13
ENSG00000109534	0.555827	9.52645e-05
ENSG00000197106	0.556233	1.85231e-13
ENSG00000140307	0.558436	0.00095879
ENSG00000101928	0.559982	1.17381e-08
ENSG00000273131	0.565082	0.00020022
ENSG00000239704	0.565357	4.68964e-06
ENSG00000013375	0.574351	2.31164e-08
ENSG00000154589	0.576337	0.000967226
ENSG00000136240	0.576668	3.96945e-11
ENSG00000157181	0.580662	8.25914e-05
ENSG00000198856	0.584435	1.18851e-07
ENSG00000223380	0.587513	6.59728e-29
ENSG00000128590	0.595918	9.12211e-11
ENSG00000168374	0.598624	7.37843e-20
ENSG00000083535	0.602568	8.81639e-05
ENSG00000148154	0.604436	8.44884e-15
ENSG00000026751	0.609508	6.62965e-23
ENSG00000172071	0.609889	5.81685e-20
ENSG00000080031	0.611841	0.000873317
ENSG00000111711	0.613359	1.98153e-09
ENSG00000198744	0.614981	0.00301391
ENSG00000175899	0.617318	4.69539e-21
ENSG00000133138	0.619617	1.9496e-10
ENSG00000101574	0.620812	0.000589276
ENSG00000226342	0.624182	3.86411e-07
ENSG00000244234	0.62858	0.000186493
ENSG00000088766	0.650205	7.13072e-07
ENSG00000047346	0.65571	3.09415e-05
ENSG00000116815	0.659007	0.000325359
ENSG00000114405	0.660068	0.000639359
ENSG00000106537	0.661692	6.70668e-12
ENSG00000137414	0.670306	1.35798e-10
ENSG00000147535	0.67033	3.41135e-12
ENSG00000112379	0.674235	1.65264e-08
ENSG00000153993	0.675296	0.000362765
ENSG00000260916	0.678504	6.54826e-17
ENSG00000120805	0.690516	9.00923e-16
ENSG00000181458	0.698058	8.47334e-09
ENSG00000090104	0.706489	6.94273e-13
ENSG00000152527	0.707942	2.13102e-05
ENSG00000071991	0.708057	6.03792e-05
ENSG00000153233	0.70827	1.21559e-06
ENSG00000067167	0.709354	1.10862e-09
ENSG00000136052	0.71183	0.000152186
ENSG00000170881	0.713613	1.17173e-08
ENSG00000140479	0.724573	0.000225014
ENSG00000174842	0.731279	0.000487047
ENSG00000256545	0.732028	1.55857e-09
ENSG00000169288	0.737301	9.48853e-06
ENSG00000145088	0.737793	1.92128e-05
ENSG00000262470	0.75034	1.92118e-08
ENSG00000140905	0.759745	0.000293845
ENSG00000164294	0.760805	1.44937e-17
ENSG00000145860	0.762741	1.9933e-29
ENSG00000153395	0.772836	3.84555e-12
ENSG00000271525	0.777951	1.8787e-16
ENSG00000125931	0.783364	3.39157e-15
ENSG00000069667	0.79053	5.76176e-05
ENSG00000132432	0.801657	3.64743e-09
ENSG00000242208	0.808952	3.9628e-05
ENSG00000124370	0.811533	1.79544e-08
ENSG00000119899	0.896135	4.71642e-27
ENSG00000260802	0.908799	2.66586e-14
ENSG00000100196	0.984073	5.72693e-78
ENSG00000125740	1.0081	9.90762e-10
ENSG00000259401	1.04031	2.89399e-20
ENSG00000006075	1.23735	3.22098e-08
ENSG00000170468	1.50773	3.54446e-06
ENSG00000265735	4.57621	5.40518e-05
ENSG00000266037	4.60151	8.56586e-05
ENSG00000251705	5.33282	4.20027e-05
ENSG00000269900	5.3538	2.59456e-05
ENSG00000263740	5.36711	1.11046e-05
ENSG00000202198	5.99473	6.86639e-06
ENSG00000264940	6.37149	0.000133623
ENSG00000206588	7.02995	4.29753e-05
ENSG00000262202	7.07846	1.03167e-05
ENSG00000206652	7.07859	4.79921e-05
ENSG00000207513	7.6186	5.82307e-05
ENSG00000206737	7.66162	2.24821e-06
ENSG00000206596	7.85779	8.44182e-06
ENSG00000207005	8.04973	1.07496e-06
ENSG00000201355	8.45963	1.17979e-05
ENSG00000207418	9.52347	3.64021e-06

## Sheet: DEG_RNA SEQ_ E47 vs NC
Gene name	Log2FC	P value
ENSG00000266885	-0.508286	0.0134157
ENSG00000236334	-0.556512	0.0123498
ENSG00000163485	-0.570113	0.012259
ENSG00000151632	-0.584688	0.0118056
ENSG00000255248	-0.573502	0.0117914
ENSG00000197291	-0.538243	0.0115689
ENSG00000100473	-0.501722	0.0114103
ENSG00000234494	-0.582165	0.0111851
ENSG00000106436	-0.594146	0.0109369
ENSG00000225077	-0.502589	0.010846
ENSG00000154274	-0.616724	0.0108021
ENSG00000183778	-0.547561	0.0107275
ENSG00000197134	-0.585567	0.0106862
ENSG00000180998	-0.685703	0.0101144
ENSG00000237357	-0.625783	0.00976912
ENSG00000236530	-0.614432	0.00872426
ENSG00000138449	-0.70541	0.00865056
ENSG00000004838	-0.556221	0.00850822
ENSG00000103044	-0.528077	0.00837286
ENSG00000236792	-0.534395	0.00807153
ENSG00000142910	-0.745665	0.00798397
ENSG00000173898	-0.567444	0.00793358
ENSG00000261959	-0.501539	0.0077517
ENSG00000160460	-0.560988	0.00772912
ENSG00000134516	-0.647208	0.00764869
ENSG00000161551	-0.527604	0.00762365
ENSG00000226057	-0.698407	0.00753952
ENSG00000161860	-0.671307	0.00744531
ENSG00000185561	-0.816374	0.00741021
ENSG00000107551	-0.735899	0.00724554
ENSG00000158164	-0.522964	0.00698535
ENSG00000115380	-0.633551	0.00696915
ENSG00000126861	-0.527162	0.00693996
ENSG00000237810	-0.66539	0.00689691
ENSG00000271266	-0.73744	0.00674898
ENSG00000206176	-0.788382	0.00669182
ENSG00000196605	-0.560234	0.00659027
ENSG00000113578	-0.812193	0.00655963
ENSG00000171962	-0.633878	0.00655133
ENSG00000102755	-0.541118	0.0063973
ENSG00000187546	-0.818961	0.00636997
ENSG00000225217	-0.803133	0.0062614
ENSG00000178301	-0.803831	0.00611149
ENSG00000131019	-0.569152	0.00601074
ENSG00000083817	-0.491057	0.00597844
ENSG00000134317	-0.622218	0.00579177
ENSG00000205744	-0.634166	0.00572502
ENSG00000073464	-1.10474	0.00569697
ENSG00000104903	-0.521377	0.00550622
ENSG00000164638	-0.624755	0.0054868
ENSG00000086717	-0.782772	0.00542275
ENSG00000158528	-0.502438	0.00541266
ENSG00000160145	-0.822443	0.00533301
ENSG00000266820	-0.621511	0.00532498
ENSG00000138376	-0.645749	0.00523615
ENSG00000258012	-0.61591	0.00492241
ENSG00000138356	-0.736858	0.00488729
ENSG00000133624	-0.527946	0.00476384
ENSG00000266088	-0.742203	0.00468416
ENSG00000231565	-1.01434	0.00457374
ENSG00000170703	-0.77707	0.00444409
ENSG00000226031	-1.24873	0.00433848
ENSG00000127528	-0.53526	0.00431554
ENSG00000072694	-0.63243	0.0042999
ENSG00000226259	-0.50778	0.00419969
ENSG00000259426	-0.877478	0.00413099
ENSG00000061273	-0.498002	0.00411826
ENSG00000182175	-0.692691	0.00409867
ENSG00000140044	-0.715632	0.0038741
ENSG00000156787	-0.511832	0.00384703
ENSG00000254416	-0.539097	0.0036193
ENSG00000157833	-0.62041	0.0029222
ENSG00000230724	-0.540065	0.00292155
ENSG00000129159	-0.854668	0.00290193
ENSG00000117289	-0.762007	0.00288422
ENSG00000230450	-0.618018	0.00280401
ENSG00000240053	-0.65604	0.00280056
ENSG00000185614	-0.684747	0.00279813
ENSG00000214425	-0.549065	0.00277093
ENSG00000187678	-0.624201	0.00274657
ENSG00000253159	-1.22272	0.00271365
ENSG00000114737	-1.02805	0.00260514
ENSG00000118420	-0.829495	0.00247958
ENSG00000180438	-1.89299	0.00233834
ENSG00000131459	-0.547989	0.00229645
ENSG00000223839	-0.877786	0.00229103
ENSG00000136327	-0.777434	0.00225209
ENSG00000213478	-0.673152	0.00222528
ENSG00000227288	-0.567573	0.00219721
ENSG00000126778	-0.555151	0.00213854
ENSG00000091622	-1.2945	0.00206121
ENSG00000184368	-0.558114	0.0020437
ENSG00000133433	-0.538973	0.0019718
ENSG00000163531	-0.654668	0.00195629
ENSG00000268941	-0.70823	0.00187125
ENSG00000137727	-0.536817	0.00182288
ENSG00000160223	-0.668143	0.00181641
ENSG00000120899	-0.577446	0.00180822
ENSG00000168209	-0.718615	0.00172948
ENSG00000019485	-0.510364	0.00168696
ENSG00000237008	-0.69132	0.00165679
ENSG00000169860	-0.654205	0.00165357
ENSG00000189184	-0.942783	0.00163954
ENSG00000179331	-0.772205	0.00157543
ENSG00000138411	-1.5268	0.00155236
ENSG00000173295	-0.672201	0.00153335
ENSG00000128656	-0.608327	0.00150638
ENSG00000255547	-0.563683	0.00150574
ENSG00000105711	-0.620432	0.0014749
ENSG00000133863	-0.598929	0.0013856
ENSG00000125845	-0.595808	0.00131574
ENSG00000074370	-0.551737	0.00129671
ENSG00000197472	-0.518123	0.00129286
ENSG00000158691	-0.52711	0.00126975
ENSG00000114859	-0.509319	0.00126185
ENSG00000134013	-0.679343	0.00125937
ENSG00000172260	-1.14151	0.00125871
ENSG00000180739	-0.912833	0.00125876
ENSG00000183117	-1.17095	0.00125614
ENSG00000258311	-0.756939	0.0012455
ENSG00000139737	-0.627989	0.00122515
ENSG00000106003	-0.504297	0.00122578
ENSG00000234323	-0.504484	0.00120395
ENSG00000100033	-0.998077	0.00113913
ENSG00000184635	-0.542232	0.00113417
ENSG00000251602	-0.613942	0.00112975
ENSG00000204682	-0.748831	0.00112663
ENSG00000136378	-1.17735	0.00111074
ENSG00000197183	-1.28125	0.00109325
ENSG00000169129	-1.24619	0.00101588
ENSG00000197121	-0.528673	0.00101325
ENSG00000065534	-0.872981	0.000979329
ENSG00000163874	-0.523372	0.000907802
ENSG00000178966	-0.517403	0.000884693
ENSG00000137628	-0.81769	0.000812555
ENSG00000164647	-0.516662	0.000778599
ENSG00000105516	-0.495646	0.000758877
ENSG00000203896	-0.660125	0.000748451
ENSG00000135378	-0.615116	0.000742949
ENSG00000143195	-1.13298	0.000737925
ENSG00000187173	-0.775207	0.000724066
ENSG00000161714	-0.597526	0.000717329
ENSG00000135917	-0.810743	0.000678989
ENSG00000214796	-0.707637	0.000671843
ENSG00000126453	-0.517187	0.000651677
ENSG00000108984	-0.695894	0.000624022
ENSG00000117228	-0.615175	0.000614759
ENSG00000268083	-0.636184	0.000581773
ENSG00000215158	-1.21097	0.000555646
ENSG00000173926	-0.571468	0.000538493
ENSG00000139318	-0.628439	0.000535143
ENSG00000184226	-0.490459	0.000523258
ENSG00000184524	-0.751623	0.000520667
ENSG00000101265	-0.510093	0.000518995
ENSG00000121210	-0.576468	0.000512507
ENSG00000175175	-0.741279	0.000510003
ENSG00000134490	-0.519261	0.000506242
ENSG00000237801	-0.706446	0.000465408
ENSG00000143375	-0.699626	0.000454475
ENSG00000119686	-0.826685	0.000439009
ENSG00000158813	-0.504793	0.000435989
ENSG00000142149	-0.761456	0.000434801
ENSG00000116652	-0.770609	0.000421943
ENSG00000130270	-0.600703	0.000405207
ENSG00000173110	-0.546689	0.000403979
ENSG00000171262	-0.548375	0.000384229
ENSG00000116329	-1.11556	0.000383044
ENSG00000115594	-1.28037	0.000380473
ENSG00000237307	-0.699051	0.000373332
ENSG00000117122	-2.29696	0.000358565
ENSG00000150627	-0.941666	0.000356728
ENSG00000240204	-1.01818	0.000347584
ENSG00000196739	-1.10098	0.000346205
ENSG00000105255	-0.541366	0.000339289
ENSG00000100867	-0.970758	0.000333589
ENSG00000091831	-1.02924	0.000317565
ENSG00000189221	-0.63418	0.000303629
ENSG00000158457	-0.495871	0.000294636
ENSG00000249465	-0.704476	0.000292794
ENSG00000146147	-0.773259	0.000275917
ENSG00000226852	-0.835592	0.000262564
ENSG00000146143	-0.550313	0.000256743
ENSG00000147862	-0.516944	0.000252131
ENSG00000154608	-0.498454	0.00024447
ENSG00000120699	-0.565168	0.000241439
ENSG00000186767	-0.617987	0.000235571
ENSG00000115507	-0.499684	0.000225807
ENSG00000174607	-0.551541	0.000209837
ENSG00000050344	-0.638689	0.000209629
ENSG00000176771	-1.16289	0.00020933
ENSG00000135898	-0.882372	0.000206424
ENSG00000128342	-0.620599	0.000188288
ENSG00000162645	-0.598569	0.000183666
ENSG00000004399	-0.532199	0.00015777
ENSG00000162769	-0.527252	0.000151872
ENSG00000177807	-0.854578	0.000149941
ENSG00000050438	-1.3634	0.000141337
ENSG00000133083	-0.724419	0.000136642
ENSG00000257010	-0.742102	0.000130312
ENSG00000171819	-1.41907	0.000125905
ENSG00000142871	-1.14697	0.000123455
ENSG00000197587	-0.863239	0.000121965
ENSG00000173421	-0.505427	0.00012109
ENSG00000102879	-1.01732	0.00011785
ENSG00000184599	-1.01394	0.000115684
ENSG00000187325	-0.621271	0.00011402
ENSG00000162840	-0.56033	0.000113399
ENSG00000172469	-0.564687	0.000111541
ENSG00000160867	-0.631835	0.000110213
ENSG00000149150	-0.518658	0.000109064
ENSG00000148426	-0.711991	0.000104459
ENSG00000005189	-0.491509	0.000103304
ENSG00000132781	-0.505663	0.000101308
ENSG00000102934	-0.821231	0.000100058
ENSG00000187456	-0.999107	9.60612e-05
ENSG00000169436	-0.729576	9.1158e-05
ENSG00000109576	-1.02937	9.01903e-05
ENSG00000157388	-0.531063	9.01803e-05
ENSG00000182010	-0.585196	8.52764e-05
ENSG00000182621	-0.508051	8.49746e-05
ENSG00000241547	-0.609025	8.17283e-05
ENSG00000136153	-0.506491	8.08855e-05
ENSG00000171503	-0.631462	7.67797e-05
ENSG00000232486	-0.843927	7.48551e-05
ENSG00000175906	-0.603354	7.36815e-05
ENSG00000187764	-0.823466	7.22757e-05
ENSG00000156239	-0.661239	6.82218e-05
ENSG00000266999	-2.44688	6.75802e-05
ENSG00000132326	-0.67562	6.75868e-05
ENSG00000259179	-0.837943	6.46549e-05
ENSG00000183150	-0.621463	6.02683e-05
ENSG00000102313	-0.728107	5.81244e-05
ENSG00000107611	-0.702741	5.57943e-05
ENSG00000100344	-0.496425	5.54153e-05
ENSG00000142178	-0.826721	5.27907e-05
ENSG00000225355	-0.543937	5.28109e-05
ENSG00000109184	-0.540424	5.19056e-05
ENSG00000080493	-0.722575	5.08212e-05
ENSG00000105655	-0.51234	4.86041e-05
ENSG00000105997	-0.53961	4.64112e-05
ENSG00000256066	-0.99948	4.33629e-05
ENSG00000140323	-1.0915	4.28915e-05
ENSG00000069535	-0.717847	4.29078e-05
ENSG00000170153	-0.720251	4.20378e-05
ENSG00000214338	-0.636619	4.20114e-05
ENSG00000168243	-0.715692	4.17735e-05
ENSG00000142627	-0.85679	4.09654e-05
ENSG00000118513	-0.689756	4.02808e-05
ENSG00000005801	-0.492943	3.78687e-05
ENSG00000068615	-0.935695	3.73716e-05
ENSG00000214827	-0.895464	3.67094e-05
ENSG00000006118	-0.695898	3.57209e-05
ENSG00000114026	-0.564064	3.55686e-05
ENSG00000119771	-0.501835	3.55168e-05
ENSG00000149256	-0.824009	3.39022e-05
ENSG00000171914	-1.09385	3.38059e-05
ENSG00000099282	-0.979717	3.25082e-05
ENSG00000169783	-0.565292	3.13303e-05
ENSG00000186300	-0.738935	2.9599e-05
ENSG00000154556	-1.75185	2.49093e-05
ENSG00000160051	-0.527276	2.48845e-05
ENSG00000175592	-0.847819	2.45795e-05
ENSG00000154447	-0.491724	2.39805e-05
ENSG00000182319	-0.506371	2.3689e-05
ENSG00000121236	-0.568366	2.28788e-05
ENSG00000153823	-0.758611	2.28347e-05
ENSG00000257743	-0.729483	2.16296e-05
ENSG00000204410	-0.536848	2.00621e-05
ENSG00000147912	-0.520279	1.94435e-05
ENSG00000175305	-0.64904	1.75573e-05
ENSG00000010539	-0.580379	1.64689e-05
ENSG00000224962	-0.79792	1.60445e-05
ENSG00000249910	-1.81269	1.43268e-05
ENSG00000156453	-1.27994	1.42005e-05
ENSG00000088305	-0.899463	1.32775e-05
ENSG00000160796	-0.561471	1.20946e-05
ENSG00000140326	-0.517397	1.17316e-05
ENSG00000271270	-0.609246	1.04304e-05
ENSG00000152495	-0.502235	1.03464e-05
ENSG00000139044	-1.3163	1.02741e-05
ENSG00000120832	-0.639517	9.43988e-06
ENSG00000135749	-0.511927	9.38671e-06
ENSG00000087253	-0.626814	9.0686e-06
ENSG00000178295	-0.617991	8.78708e-06
ENSG00000076641	-0.494337	8.34377e-06
ENSG00000074047	-1.91712	8.32107e-06
ENSG00000106077	-0.515528	8.30738e-06
ENSG00000152240	-0.51978	8.28284e-06
ENSG00000142733	-0.531751	7.95253e-06
ENSG00000000460	-0.492814	7.86145e-06
ENSG00000163273	-0.758391	7.8328e-06
ENSG00000142197	-0.583179	7.7251e-06
ENSG00000129353	-0.775851	7.54844e-06
ENSG00000058453	-0.610402	7.54974e-06
ENSG00000121753	-0.586694	7.36454e-06
ENSG00000141401	-0.500941	7.10202e-06
ENSG00000126822	-0.527993	7.0037e-06
ENSG00000189007	-0.696362	6.80293e-06
ENSG00000106459	-0.558492	6.76848e-06
ENSG00000267041	-0.559945	6.63182e-06
ENSG00000254726	-0.936164	5.9068e-06
ENSG00000150893	-0.787264	5.88935e-06
ENSG00000181449	-1.0501	5.87298e-06
ENSG00000140022	-0.701108	5.72526e-06
ENSG00000005469	-0.571216	5.56267e-06
ENSG00000235489	-0.597494	5.43545e-06
ENSG00000226535	-0.790003	5.0756e-06
ENSG00000125434	-0.503183	5.0662e-06
ENSG00000157514	-1.00891	4.99036e-06
ENSG00000143942	-0.683984	4.68209e-06
ENSG00000162722	-0.548969	4.4558e-06
ENSG00000171320	-0.708879	4.43267e-06
ENSG00000176894	-0.53767	4.16176e-06
ENSG00000185697	-0.583615	4.12313e-06
ENSG00000172731	-0.736501	4.066e-06
ENSG00000183023	-0.818712	4.01887e-06
ENSG00000138685	-1.21573	3.92283e-06
ENSG00000113119	-0.532159	3.91088e-06
ENSG00000182379	-0.556533	3.87325e-06
ENSG00000115687	-0.524984	3.68757e-06
ENSG00000162624	-0.657588	3.46958e-06
ENSG00000128016	-0.9458	3.43212e-06
ENSG00000105173	-0.516397	3.23043e-06
ENSG00000184465	-0.676898	3.05315e-06
ENSG00000156509	-0.796904	2.86926e-06
ENSG00000162757	-0.813806	2.69257e-06
ENSG00000144554	-0.503249	2.4954e-06
ENSG00000006210	-0.557126	2.3621e-06
ENSG00000158887	-0.823021	2.31536e-06
ENSG00000196526	-0.887533	2.17845e-06
ENSG00000177595	-0.535908	2.03992e-06
ENSG00000067191	-1.14704	1.93896e-06
ENSG00000118523	-0.519393	1.89109e-06
ENSG00000135119	-0.655144	1.8684e-06
ENSG00000065320	-0.599048	1.77822e-06
ENSG00000215883	-0.510027	1.58393e-06
ENSG00000137404	-0.526499	1.56235e-06
ENSG00000215784	-0.529473	1.44536e-06
ENSG00000092964	-0.511105	1.28789e-06
ENSG00000198604	-0.560204	1.27597e-06
ENSG00000189410	-0.77486	9.86263e-07
ENSG00000152104	-0.505929	9.6862e-07
ENSG00000173145	-0.623061	9.60174e-07
ENSG00000187123	-0.738617	9.56095e-07
ENSG00000169684	-0.651762	9.5533e-07
ENSG00000111859	-0.543408	9.18867e-07
ENSG00000197275	-0.793051	8.55116e-07
ENSG00000171316	-0.692744	8.18059e-07
ENSG00000024526	-0.681134	6.88178e-07
ENSG00000183864	-0.671397	6.82687e-07
ENSG00000066279	-0.644927	6.7307e-07
ENSG00000161048	-0.580823	6.65242e-07
ENSG00000120693	-0.855175	6.42823e-07
ENSG00000167508	-0.491764	6.39823e-07
ENSG00000187741	-0.49862	6.29891e-07
ENSG00000163064	-0.742037	6.17165e-07
ENSG00000148680	-0.492248	5.97817e-07
ENSG00000166845	-0.881485	5.91556e-07
ENSG00000169047	-0.547562	5.75556e-07
ENSG00000179104	-0.504737	5.63793e-07
ENSG00000065328	-0.704368	5.28964e-07
ENSG00000154864	-1.00025	5.04292e-07
ENSG00000218422	-0.579659	4.88679e-07
ENSG00000174705	-0.604116	4.70297e-07
ENSG00000078900	-0.55797	4.66358e-07
ENSG00000224126	-0.491173	4.03156e-07
ENSG00000078053	-0.531015	3.72589e-07
ENSG00000102384	-0.564003	3.59713e-07
ENSG00000105880	-1.68961	3.5791e-07
ENSG00000240694	-0.701012	3.35433e-07
ENSG00000156970	-0.497228	3.28299e-07
ENSG00000250588	-0.526372	3.2607e-07
ENSG00000146918	-0.55853	3.24616e-07
ENSG00000051341	-0.546222	2.78489e-07
ENSG00000101220	-0.512951	2.55735e-07
ENSG00000121440	-0.493827	2.164e-07
ENSG00000181588	-0.554495	2.15311e-07
ENSG00000021826	-0.563754	1.94637e-07
ENSG00000183458	-0.5151	1.73661e-07
ENSG00000004777	-0.804697	1.71407e-07
ENSG00000144406	-1.4727	1.7013e-07
ENSG00000145632	-0.803128	1.59108e-07
ENSG00000119285	-0.595019	1.58052e-07
ENSG00000125848	-1.22171	1.57733e-07
ENSG00000186812	-0.740749	1.45838e-07
ENSG00000092140	-0.668959	1.44967e-07
ENSG00000165097	-0.64085	1.23698e-07
ENSG00000163808	-0.501645	1.22477e-07
ENSG00000038427	-1.61187	1.13359e-07
ENSG00000154146	-0.659887	1.02806e-07
ENSG00000140534	-0.585378	9.8162e-08
ENSG00000085999	-0.735389	9.02754e-08
ENSG00000213160	-0.578342	8.22429e-08
ENSG00000158402	-0.801268	8.14914e-08
ENSG00000123473	-0.541343	6.39645e-08
ENSG00000136982	-0.765334	6.3844e-08
ENSG00000106785	-0.583047	6.25886e-08
ENSG00000064300	-1.1639	5.46984e-08
ENSG00000198826	-0.569415	5.43831e-08
ENSG00000149212	-0.522618	5.43795e-08
ENSG00000104369	-0.893442	4.78461e-08
ENSG00000250852	-1.00725	4.68276e-08
ENSG00000167074	-0.634927	4.37384e-08
ENSG00000105559	-0.571682	4.23256e-08
ENSG00000164976	-0.689855	4.07611e-08
ENSG00000147383	-0.597747	4.04974e-08
ENSG00000113657	-0.669339	3.82756e-08
ENSG00000058804	-0.54654	3.77583e-08
ENSG00000137804	-0.572691	3.64706e-08
ENSG00000181104	-1.20884	3.44963e-08
ENSG00000185483	-0.663905	3.27939e-08
ENSG00000158352	-0.506264	3.24649e-08
ENSG00000166689	-0.715188	3.17965e-08
ENSG00000180900	-0.672148	2.76115e-08
ENSG00000188985	-0.510662	2.6975e-08
ENSG00000108852	-0.694808	2.56049e-08
ENSG00000101104	-0.628311	2.32124e-08
ENSG00000259358	-1.04883	2.15756e-08
ENSG00000136111	-0.729523	2.0261e-08
ENSG00000100162	-0.509754	2.02538e-08
ENSG00000091972	-0.577348	1.91697e-08
ENSG00000177084	-0.507377	1.89666e-08
ENSG00000130600	-1.02795	1.87633e-08
ENSG00000130164	-0.502678	1.78143e-08
ENSG00000115232	-0.799247	1.74983e-08
ENSG00000213390	-0.543678	1.69332e-08
ENSG00000067836	-0.656908	1.53488e-08
ENSG00000087510	-0.520486	1.51522e-08
ENSG00000102048	-0.615956	1.49409e-08
ENSG00000163507	-0.657157	1.4544e-08
ENSG00000115107	-0.855193	1.42043e-08
ENSG00000078018	-0.82133	1.41357e-08
ENSG00000103199	-0.748956	1.1635e-08
ENSG00000185298	-0.585595	1.12826e-08
ENSG00000157557	-0.626178	1.05136e-08
ENSG00000169607	-0.567387	9.57949e-09
ENSG00000018699	-0.667366	9.33636e-09
ENSG00000234176	-0.505177	8.63844e-09
ENSG00000056558	-0.636734	8.24047e-09
ENSG00000143476	-0.504801	7.72025e-09
ENSG00000112208	-0.636725	7.13602e-09
ENSG00000011332	-0.946996	6.78677e-09
ENSG00000120254	-0.501764	6.41622e-09
ENSG00000168078	-0.533649	6.31772e-09
ENSG00000167470	-0.714605	6.0128e-09
ENSG00000168913	-0.695938	5.42856e-09
ENSG00000163013	-0.534906	5.13254e-09
ENSG00000158321	-1.08522	4.11505e-09
ENSG00000112210	-0.616009	4.03798e-09
ENSG00000140931	-0.497892	4.00965e-09
ENSG00000107882	-0.518891	3.96994e-09
ENSG00000213347	-0.581349	3.77146e-09
ENSG00000124126	-0.535183	3.6802e-09
ENSG00000145604	-0.743029	3.51234e-09
ENSG00000164741	-0.800857	3.23761e-09
ENSG00000216819	-0.971556	3.1037e-09
ENSG00000171241	-0.496551	2.8127e-09
ENSG00000170312	-0.795033	2.77058e-09
ENSG00000109805	-0.754448	2.71343e-09
ENSG00000132196	-0.755279	2.51362e-09
ENSG00000261373	-1.15728	2.41453e-09
ENSG00000136603	-0.648172	2.28584e-09
ENSG00000076770	-0.801966	2.17539e-09
ENSG00000144677	-0.521946	2.17306e-09
ENSG00000137501	-0.598007	2.10841e-09
ENSG00000144355	-0.694464	2.06074e-09
ENSG00000104889	-0.503532	2.05007e-09
ENSG00000140859	-0.53971	2.02108e-09
ENSG00000204775	-0.628306	1.90707e-09
ENSG00000213983	-0.578572	1.88094e-09
ENSG00000165480	-0.633781	1.8281e-09
ENSG00000102221	-0.521455	1.82679e-09
ENSG00000060749	-0.819697	1.76345e-09
ENSG00000189159	-0.709445	1.65816e-09
ENSG00000159388	-1.28287	1.50596e-09
ENSG00000110921	-0.706042	1.37255e-09
ENSG00000140451	-1.07642	1.26703e-09
ENSG00000135451	-0.637941	1.08673e-09
ENSG00000080709	-0.767211	9.83463e-10
ENSG00000112149	-0.50577	9.66126e-10
ENSG00000072571	-0.586313	9.6465e-10
ENSG00000166803	-0.68177	7.69644e-10
ENSG00000035499	-0.767438	7.25174e-10
ENSG00000115884	-0.575565	7.20979e-10
ENSG00000100889	-0.636983	6.77122e-10
ENSG00000164434	-0.634796	6.30711e-10
ENSG00000106144	-0.548886	5.9984e-10
ENSG00000135437	-1.26489	5.65964e-10
ENSG00000104884	-0.520566	4.647e-10
ENSG00000165072	-2.04813	4.62776e-10
ENSG00000144868	-0.857524	4.40379e-10
ENSG00000071539	-0.517615	3.79138e-10
ENSG00000152953	-0.709462	3.52448e-10
ENSG00000101224	-0.583441	3.48271e-10
ENSG00000157456	-0.590704	3.46649e-10
ENSG00000149782	-0.645705	3.44564e-10
ENSG00000272711	-0.905534	3.27446e-10
ENSG00000146376	-0.515724	3.14545e-10
ENSG00000241095	-0.726884	2.99763e-10
ENSG00000175602	-0.5135	2.81498e-10
ENSG00000163026	-0.609747	2.5739e-10
ENSG00000170727	-0.532808	2.25768e-10
ENSG00000115355	-0.490418	2.15572e-10
ENSG00000160326	-0.852738	2.11646e-10
ENSG00000198753	-0.501775	1.91258e-10
ENSG00000138778	-0.762691	1.78629e-10
ENSG00000129682	-0.729043	1.78148e-10
ENSG00000137814	-0.595373	1.7632e-10
ENSG00000105732	-0.645027	1.36766e-10
ENSG00000226650	-0.610125	1.19392e-10
ENSG00000077152	-0.5682	1.18832e-10
ENSG00000185585	-0.803843	1.1794e-10
ENSG00000161791	-0.529785	1.0682e-10
ENSG00000106462	-0.554714	9.51357e-11
ENSG00000163347	-1.22192	9.11095e-11
ENSG00000105722	-0.537023	8.33392e-11
ENSG00000121152	-0.530561	6.27253e-11
ENSG00000178538	-0.496954	6.02764e-11
ENSG00000112297	-1.50163	5.50345e-11
ENSG00000178202	-0.609548	5.41013e-11
ENSG00000118193	-0.674631	4.67662e-11
ENSG00000067064	-0.62584	4.67396e-11
ENSG00000178922	-0.680613	4.29275e-11
ENSG00000108424	-0.493206	3.67547e-11
ENSG00000106714	-0.855492	3.0673e-11
ENSG00000079156	-0.745981	2.87253e-11
ENSG00000135912	-0.496005	2.76174e-11
ENSG00000138160	-0.505834	2.19111e-11
ENSG00000126215	-0.711697	1.96712e-11
ENSG00000197321	-0.529712	1.94153e-11
ENSG00000111424	-0.601329	1.85476e-11
ENSG00000108106	-0.584433	1.81562e-11
ENSG00000116455	-0.52091	1.51301e-11
ENSG00000182841	-0.713206	1.39871e-11
ENSG00000180672	-0.712766	1.36989e-11
ENSG00000145794	-0.965258	1.26106e-11
ENSG00000137801	-2.07237	1.1855e-11
ENSG00000185340	-0.686361	1.0275e-11
ENSG00000166741	-0.954336	6.7434e-12
ENSG00000171604	-0.740431	6.24289e-12
ENSG00000144802	-0.892472	6.17799e-12
ENSG00000166833	-0.527657	5.04473e-12
ENSG00000127564	-0.58958	4.50283e-12
ENSG00000185112	-0.537054	3.9802e-12
ENSG00000050405	-0.541787	3.82805e-12
ENSG00000233588	-0.689735	3.62052e-12
ENSG00000198055	-0.598431	3.20308e-12
ENSG00000146072	-0.640587	3.07501e-12
ENSG00000173706	-0.583455	2.8104e-12
ENSG00000021762	-0.700312	2.70699e-12
ENSG00000138119	-0.502285	2.6155e-12
ENSG00000158008	-0.517943	2.3172e-12
ENSG00000165617	-1.64609	2.11894e-12
ENSG00000102996	-0.665329	2.10096e-12
ENSG00000119408	-0.638833	2.09187e-12
ENSG00000129810	-0.666793	1.77742e-12
ENSG00000169258	-0.533864	1.63902e-12
ENSG00000100092	-0.622816	1.34778e-12
ENSG00000166016	-0.575668	1.25381e-12
ENSG00000139641	-0.559752	1.11763e-12
ENSG00000091409	-0.64336	9.28263e-13
ENSG00000076382	-0.498357	7.76398e-13
ENSG00000147889	-0.508114	5.64119e-13
ENSG00000090097	-0.645247	5.40165e-13
ENSG00000198830	-0.60326	4.85581e-13
ENSG00000100345	-0.507012	4.41217e-13
ENSG00000163235	-0.853438	4.26721e-13
ENSG00000112759	-0.538389	4.25416e-13
ENSG00000146733	-0.630891	3.89949e-13
ENSG00000169136	-0.52104	3.72397e-13
ENSG00000117650	-0.654138	3.5815e-13
ENSG00000080986	-0.627478	3.54534e-13
ENSG00000125520	-0.682741	2.83144e-13
ENSG00000105576	-0.611487	2.57269e-13
ENSG00000183856	-0.774621	1.79714e-13
ENSG00000095319	-0.585175	1.79728e-13
ENSG00000168874	-1.14376	1.51085e-13
ENSG00000096060	-0.647069	1.51154e-13
ENSG00000114790	-0.836841	1.49541e-13
ENSG00000118257	-0.55319	1.15225e-13
ENSG00000174371	-0.620325	8.19622e-14
ENSG00000125898	-0.881073	7.50384e-14
ENSG00000026559	-1.25874	7.12043e-14
ENSG00000173166	-0.653816	6.75936e-14
ENSG00000179958	-0.490102	6.13591e-14
ENSG00000154839	-0.74771	6.02864e-14
ENSG00000160200	-0.816448	5.62742e-14
ENSG00000108773	-0.620514	5.22807e-14
ENSG00000185985	-0.746012	4.84809e-14
ENSG00000162733	-0.676594	3.66028e-14
ENSG00000178409	-0.736616	2.47373e-14
ENSG00000175063	-0.698523	2.26385e-14
ENSG00000103335	-0.773373	2.07604e-14
ENSG00000142945	-0.58318	1.39507e-14
ENSG00000213763	-1.1264	1.20059e-14
ENSG00000134291	-0.526113	9.0464e-15
ENSG00000176014	-0.629186	6.31921e-15
ENSG00000177602	-0.767008	3.8495e-15
ENSG00000143815	-0.740486	3.48753e-15
ENSG00000184661	-0.550184	2.99449e-15
ENSG00000131462	-0.6558	2.90163e-15
ENSG00000128594	-0.946583	2.84026e-15
ENSG00000155090	-1.01994	2.13532e-15
ENSG00000125968	-0.677966	2.12189e-15
ENSG00000144354	-0.688117	2.02202e-15
ENSG00000011426	-0.904841	1.98408e-15
ENSG00000117877	-0.712813	1.6819e-15
ENSG00000138180	-0.555271	1.03257e-15
ENSG00000068489	-0.635592	8.22752e-16
ENSG00000196083	-0.660968	5.25787e-16
ENSG00000074416	-1.468	3.80666e-16
ENSG00000162063	-0.924406	3.02185e-16
ENSG00000197977	-0.783893	2.43175e-16
ENSG00000107984	-1.23725	2.04656e-16
ENSG00000234664	-0.624011	1.76227e-16
ENSG00000090889	-0.725183	1.75114e-16
ENSG00000111206	-0.562943	1.49749e-16
ENSG00000082516	-0.685737	1.4173e-16
ENSG00000173894	-0.886906	1.24708e-16
ENSG00000164211	-0.944949	1.11948e-16
ENSG00000166963	-0.892962	9.04978e-17
ENSG00000138031	-0.56788	8.92833e-17
ENSG00000172164	-0.814372	6.16727e-17
ENSG00000150551	-0.932186	3.09381e-17
ENSG00000007968	-0.619341	2.77972e-17
ENSG00000129116	-0.738969	1.93261e-17
ENSG00000188807	-0.629176	1.85922e-17
ENSG00000178921	-0.634657	1.67907e-17
ENSG00000154127	-1.0451	1.18609e-17
ENSG00000137135	-1.00945	1.12881e-17
ENSG00000062485	-0.492611	1.06627e-17
ENSG00000170540	-0.811298	1.03018e-17
ENSG00000176890	-0.611322	6.64396e-18
ENSG00000166068	-0.679797	3.37858e-18
ENSG00000118113	-0.609357	2.00128e-18
ENSG00000058056	-0.709512	1.42076e-18
ENSG00000178209	-0.564248	1.05834e-18
ENSG00000179583	-1.61367	1.01587e-18
ENSG00000179750	-0.623267	9.08224e-19
ENSG00000109674	-1.18236	8.44204e-19
ENSG00000013810	-0.684301	7.71448e-19
ENSG00000103942	-0.826534	7.28269e-19
ENSG00000135046	-0.672078	6.7916e-19
ENSG00000248590	-0.739105	6.07383e-19
ENSG00000133026	-0.774503	5.21219e-19
ENSG00000139926	-0.68034	4.50356e-19
ENSG00000186469	-1.0306	3.99961e-19
ENSG00000149503	-0.582941	3.10264e-19
ENSG00000189091	-0.585211	2.16923e-19
ENSG00000065361	-0.69052	1.75332e-19
ENSG00000070669	-1.04005	1.72103e-19
ENSG00000184486	-1.06636	1.5661e-19
ENSG00000178445	-0.885595	6.2592e-20
ENSG00000137285	-0.803041	5.29134e-20
ENSG00000163739	-2.09908	4.3146e-20
ENSG00000143878	-0.834232	4.10482e-20
ENSG00000237649	-0.71322	2.58902e-20
ENSG00000115318	-0.707046	2.06643e-20
ENSG00000117724	-0.562331	1.57123e-20
ENSG00000137807	-0.671353	8.87663e-21
ENSG00000064999	-0.693884	7.32993e-21
ENSG00000178999	-0.704053	6.72138e-21
ENSG00000198911	-0.647011	5.83515e-21
ENSG00000105011	-0.613551	5.46104e-21
ENSG00000247626	-0.7603	3.62198e-21
ENSG00000145386	-0.883943	2.06049e-21
ENSG00000137460	-1.13605	1.543e-21
ENSG00000101057	-0.720529	1.37387e-21
ENSG00000147588	-0.803146	1.32406e-21
ENSG00000109084	-0.767079	1.19985e-21
ENSG00000178980	-0.776108	8.48209e-22
ENSG00000163430	-0.686802	7.35548e-22
ENSG00000196924	-0.639593	4.21053e-22
ENSG00000101003	-0.82367	3.11098e-22
ENSG00000129195	-1.10274	2.84102e-22
ENSG00000132694	-0.785624	2.41772e-22
ENSG00000134057	-0.824672	1.80434e-22
ENSG00000146950	-1.1544	1.31696e-22
ENSG00000131747	-0.885352	2.42378e-23
ENSG00000135074	-0.97573	1.95066e-23
ENSG00000129173	-1.14622	1.30429e-23
ENSG00000117519	-0.753134	1.11802e-23
ENSG00000172893	-0.621026	2.85368e-24
ENSG00000171848	-0.587371	1.90451e-24
ENSG00000168453	-1.21623	1.16367e-24
ENSG00000120437	-0.96239	6.25009e-25
ENSG00000087586	-0.595092	2.98269e-25
ENSG00000184009	-0.697223	1.28347e-25
ENSG00000112972	-0.95228	5.9522e-26
ENSG00000073792	-0.717414	5.65594e-26
ENSG00000010292	-0.838232	3.91961e-26
ENSG00000111665	-0.918151	1.26906e-26
ENSG00000136205	-0.694725	1.08293e-26
ENSG00000119403	-0.628523	8.65594e-27
ENSG00000214357	-1.11457	6.29239e-27
ENSG00000137267	-0.819138	5.13722e-27
ENSG00000134222	-0.898009	4.3038e-27
ENSG00000175040	-0.740097	3.25349e-27
ENSG00000100234	-0.531772	2.43882e-27
ENSG00000164125	-1.78265	1.66102e-27
ENSG00000135476	-0.92321	8.97761e-28
ENSG00000088325	-0.635857	4.30348e-28
ENSG00000231007	-1.0872	2.984e-28
ENSG00000113368	-0.978346	2.36484e-28
ENSG00000182481	-0.760856	1.29051e-28
ENSG00000186185	-1.04865	2.73443e-29
ENSG00000083857	-0.613234	2.67257e-29
ENSG00000166851	-1.03411	1.7934e-29
ENSG00000001630	-0.769936	4.54042e-30
ENSG00000230787	-0.956535	3.55214e-30
ENSG00000034063	-0.926977	1.35888e-30
ENSG00000150687	-0.710989	8.27716e-31
ENSG00000007237	-0.723929	2.79666e-31
ENSG00000176619	-0.675983	2.32455e-31
ENSG00000041982	-0.764932	1.2741e-31
ENSG00000214391	-0.845963	2.80566e-32
ENSG00000148773	-0.691708	8.90638e-35
ENSG00000153048	-0.801397	6.35632e-35
ENSG00000256663	-0.938962	2.36943e-35
ENSG00000138074	-0.745136	1.46143e-35
ENSG00000052802	-1.4191	6.53697e-36
ENSG00000258947	-1.03521	6.38147e-36
ENSG00000123485	-0.695896	5.97346e-36
ENSG00000123416	-0.833131	4.73503e-38
ENSG00000188229	-0.940608	9.04651e-39
ENSG00000075218	-0.80338	3.55677e-40
ENSG00000134690	-0.948509	2.98448e-40
ENSG00000135069	-0.855946	8.06336e-41
ENSG00000075624	-0.951116	7.15045e-41
ENSG00000114019	-1.58651	4.35642e-41
ENSG00000171617	-1.83995	2.14928e-43
ENSG00000167553	-0.93191	2.15866e-44
ENSG00000117399	-1.03636	1.32995e-45
ENSG00000242265	-0.802214	1.13157e-46
ENSG00000101096	-1.26123	1.50444e-47
ENSG00000183853	-0.853215	1.69608e-49
ENSG00000196230	-0.965763	1.79361e-52
ENSG00000101447	-1.03509	1.07146e-55
ENSG00000167552	-1.08115	2.15945e-57
ENSG00000112984	-1.15468	2.14583e-60
ENSG00000127589	-0.993054	2.21777e-65
ENSG00000104368	-1.28145	7.6739e-70
ENSG00000183963	-1.16991	4.9574e-75
ENSG00000234589	0.570058	0.0134228
ENSG00000262251	0.530215	0.0125609
ENSG00000253468	0.582635	0.0117268
ENSG00000272091	0.592116	0.0108521
ENSG00000232734	0.528542	0.0105758
ENSG00000261509	0.492161	0.0103558
ENSG00000268713	0.497081	0.0102766
ENSG00000270975	0.660905	0.0101878
ENSG00000271888	0.63706	0.0101653
ENSG00000091428	0.565992	0.0101009
ENSG00000156966	0.773632	0.00933024
ENSG00000272086	0.567969	0.00902559
ENSG00000232053	0.562823	0.0089727
ENSG00000224201	0.573635	0.00884366
ENSG00000270189	0.501435	0.00881619
ENSG00000265136	0.7689	0.00880641
ENSG00000261220	0.650555	0.00864994
ENSG00000272316	0.79806	0.00859474
ENSG00000250903	0.580307	0.00857333
ENSG00000236829	0.499737	0.00844524
ENSG00000145687	0.514586	0.00817516
ENSG00000148090	0.503925	0.00746348
ENSG00000227199	0.517572	0.00741549
ENSG00000155629	0.503157	0.00732798
ENSG00000242272	0.556848	0.00700186
ENSG00000197863	0.553811	0.00692671
ENSG00000268006	0.701688	0.00690422
ENSG00000218265	0.526887	0.00660405
ENSG00000003436	0.585998	0.00657075
ENSG00000241313	0.57628	0.00656366
ENSG00000250144	0.654271	0.00648953
ENSG00000269888	0.636501	0.00622674
ENSG00000129757	0.531217	0.00590675
ENSG00000225768	0.559751	0.00578502
ENSG00000154025	1.72168	0.00545231
ENSG00000229162	0.542313	0.00511949
ENSG00000139679	0.639127	0.00510615
ENSG00000175302	0.492151	0.00509031
ENSG00000244701	1.03884	0.00476555
ENSG00000177363	0.854922	0.00475216
ENSG00000261487	0.722954	0.00467285
ENSG00000198744	0.612329	0.00464728
ENSG00000212734	0.532388	0.00462874
ENSG00000263327	0.813048	0.00451136
ENSG00000182574	0.546419	0.00431466
ENSG00000011028	0.516094	0.00430769
ENSG00000131668	0.874044	0.00398065
ENSG00000213661	0.836538	0.00393091
ENSG00000100604	1.31973	0.00388391
ENSG00000266707	0.682429	0.00386911
ENSG00000272092	1.14554	0.0038578
ENSG00000180573	0.810223	0.00381038
ENSG00000187667	0.574458	0.00362162
ENSG00000267541	1.07126	0.00349666
ENSG00000255823	0.765842	0.00346572
ENSG00000102796	0.504542	0.00341411
ENSG00000250988	0.511066	0.00325555
ENSG00000196911	0.56275	0.00318901
ENSG00000269821	0.509727	0.00316458
ENSG00000239223	0.529816	0.00309568
ENSG00000202198	0.566057	0.00307811
ENSG00000272606	0.571039	0.00294715
ENSG00000162892	1.02271	0.00272058
ENSG00000245680	0.571749	0.00271761
ENSG00000238244	0.62867	0.00271439
ENSG00000173451	0.686912	0.00267004
ENSG00000258758	0.563132	0.00252703
ENSG00000273443	1.23195	0.0025086
ENSG00000165949	1.8305	0.00245801
ENSG00000214595	0.882912	0.00242378
ENSG00000169330	0.533961	0.00237961
ENSG00000245970	0.897715	0.00237342
ENSG00000137747	0.629972	0.00231293
ENSG00000115841	0.506828	0.00223859
ENSG00000259605	0.775544	0.00221646
ENSG00000135525	0.738488	0.00209621
ENSG00000155974	0.977465	0.00206875
ENSG00000137193	0.522266	0.00206153
ENSG00000235961	0.580255	0.00202079
ENSG00000225978	0.647047	0.00197124
ENSG00000177757	1.75154	0.00196831
ENSG00000265735	0.68904	0.00194471
ENSG00000267436	0.837655	0.00184534
ENSG00000128918	0.518341	0.00178113
ENSG00000146587	0.554506	0.0017498
ENSG00000272686	0.518795	0.00171675
ENSG00000159761	0.58875	0.00171365
ENSG00000262831	2.03192	0.00167815
ENSG00000267528	0.512661	0.00161338
ENSG00000126870	0.666311	0.00158078
ENSG00000145832	1.18	0.00157079
ENSG00000167972	0.798619	0.00156825
ENSG00000119636	0.617096	0.00155464
ENSG00000239887	0.662316	0.00149748
ENSG00000266208	0.576799	0.00148774
ENSG00000203666	0.838194	0.00147951
ENSG00000268913	2.37331	0.00142833
ENSG00000272267	0.781915	0.00140482
ENSG00000238121	1.57155	0.00139233
ENSG00000261115	1.6712	0.00139114
ENSG00000183307	0.890367	0.00135201
ENSG00000261455	0.559171	0.00127627
ENSG00000265494	1.09454	0.00122456
ENSG00000272405	0.627164	0.00116529
ENSG00000223899	1.42286	0.00116263
ENSG00000182326	0.543902	0.00113454
ENSG00000215861	1.50357	0.00110282
ENSG00000186862	0.580655	0.00107035
ENSG00000247516	0.496531	0.00104045
ENSG00000120068	0.798725	0.00101566
ENSG00000235314	0.931961	0.00100109
ENSG00000188897	1.17901	0.000974693
ENSG00000269968	0.566754	0.000935212
ENSG00000250011	0.611254	0.000934113
ENSG00000104361	0.601367	0.000857431
ENSG00000165879	0.492371	0.000808045
ENSG00000212710	0.794224	0.000803251
ENSG00000269781	2.40002	0.000760536
ENSG00000233117	1.01782	0.000749971
ENSG00000197959	0.831402	0.000743733
ENSG00000169249	0.622539	0.000726899
ENSG00000233429	0.582612	0.000692433
ENSG00000218537	0.506088	0.000648793
ENSG00000184949	0.94228	0.000622715
ENSG00000130477	1.61327	0.000610685
ENSG00000245149	0.748004	0.00055333
ENSG00000112182	0.548692	0.000547329
ENSG00000223886	0.517331	0.000531624
ENSG00000181350	0.570762	0.000511983
ENSG00000256576	1.18423	0.000498995
ENSG00000271711	0.517152	0.000498393
ENSG00000007264	0.591856	0.000495375
ENSG00000041515	0.562629	0.00048403
ENSG00000181218	0.801565	0.00046027
ENSG00000228878	1.32769	0.000425315
ENSG00000197991	2.67172	0.00042043
ENSG00000227946	0.491234	0.000413057
ENSG00000269554	0.554662	0.000404252
ENSG00000141068	0.747627	0.000379675
ENSG00000183154	1.00657	0.000366752
ENSG00000239482	0.60057	0.000363268
ENSG00000090382	0.742962	0.000360257
ENSG00000254387	0.893938	0.000312814
ENSG00000232679	0.883736	0.000295259
ENSG00000153714	0.812151	0.000288127
ENSG00000176595	0.529473	0.000278457
ENSG00000239911	0.97652	0.000277927
ENSG00000164659	0.537149	0.000272794
ENSG00000108947	0.500135	0.000270214
ENSG00000232284	1.11988	0.000245789
ENSG00000006459	0.671467	0.000237962
ENSG00000252690	0.673222	0.000213479
ENSG00000187243	1.18779	0.000201122
ENSG00000105829	0.493839	0.000197758
ENSG00000203288	0.982429	0.000185857
ENSG00000166246	1.66865	0.000182511
ENSG00000184441	0.790103	0.000174444
ENSG00000146205	0.561344	0.000166042
ENSG00000146094	1.53008	0.00013549
ENSG00000225972	0.90085	0.00013025
ENSG00000213194	0.525501	0.000123017
ENSG00000123106	0.53743	0.000122758
ENSG00000254481	0.564284	0.000121946
ENSG00000226251	1.6313	0.000118967
ENSG00000244476	1.03996	0.000117479
ENSG00000011566	0.578503	0.000115402
ENSG00000166046	0.921991	0.000114053
ENSG00000188451	0.536974	0.000113408
ENSG00000137449	0.495072	0.000101779
ENSG00000170579	0.602531	0.000101638
ENSG00000273344	0.578545	9.86681e-05
ENSG00000204314	0.640009	9.75994e-05
ENSG00000270181	0.602501	9.22623e-05
ENSG00000166002	0.534203	8.55884e-05
ENSG00000266753	0.695527	8.1434e-05
ENSG00000159733	1.02055	7.94965e-05
ENSG00000150527	0.526378	7.76493e-05
ENSG00000231434	0.583241	7.70682e-05
ENSG00000114487	0.552451	7.45164e-05
ENSG00000116266	0.518453	6.27421e-05
ENSG00000112406	0.496895	6.26993e-05
ENSG00000071246	0.55346	6.00134e-05
ENSG00000110002	0.566788	5.59598e-05
ENSG00000235034	1.35096	5.40943e-05
ENSG00000176177	0.797744	5.10532e-05
ENSG00000114120	0.491286	5.05432e-05
ENSG00000162510	1.64881	4.69204e-05
ENSG00000225205	1.01877	4.4667e-05
ENSG00000156414	1.537	4.46084e-05
ENSG00000205129	1.65547	4.29544e-05
ENSG00000128645	0.608445	4.0803e-05
ENSG00000163818	0.534356	3.85622e-05
ENSG00000272106	0.616363	3.81658e-05
ENSG00000074855	0.596209	3.73274e-05
ENSG00000219102	0.53831	3.63006e-05
ENSG00000236312	0.5436	3.6206e-05
ENSG00000137976	0.905351	3.53191e-05
ENSG00000175106	0.512561	3.51337e-05
ENSG00000140297	1.04288	3.24607e-05
ENSG00000185056	1.8683	3.1507e-05
ENSG00000233401	0.689693	3.10775e-05
ENSG00000125355	0.515295	3.09403e-05
ENSG00000224982	1.77069	2.95737e-05
ENSG00000215105	0.496345	2.70017e-05
ENSG00000102003	0.568188	2.6963e-05
ENSG00000120519	0.801312	2.60968e-05
ENSG00000184481	0.557346	2.55637e-05
ENSG00000221947	0.605087	2.35481e-05
ENSG00000083799	0.496221	2.27342e-05
ENSG00000178764	0.527672	2.23288e-05
ENSG00000249774	0.635524	2.20645e-05
ENSG00000140479	0.801532	2.15145e-05
ENSG00000228288	0.881615	2.11963e-05
ENSG00000165548	2.14067	2.02014e-05
ENSG00000196242	0.604936	1.90621e-05
ENSG00000223877	1.03699	1.85538e-05
ENSG00000186594	0.943812	1.61375e-05
ENSG00000059728	0.587113	1.49484e-05
ENSG00000160190	0.58159	1.3157e-05
ENSG00000183718	0.611572	1.25593e-05
ENSG00000215014	1.10652	1.20683e-05
ENSG00000204178	0.686373	1.03798e-05
ENSG00000175854	0.513138	1.03349e-05
ENSG00000092931	0.602383	9.69188e-06
ENSG00000253683	0.539044	9.05743e-06
ENSG00000270090	0.760214	9.02643e-06
ENSG00000105668	0.938478	8.81588e-06
ENSG00000099860	0.659616	7.70557e-06
ENSG00000236423	0.862277	7.53997e-06
ENSG00000225787	0.697084	7.55156e-06
ENSG00000183735	0.53623	6.63624e-06
ENSG00000167733	0.594638	5.41514e-06
ENSG00000250378	0.710974	5.37226e-06
ENSG00000233937	0.493617	5.26919e-06
ENSG00000166816	0.6597	5.13047e-06
ENSG00000144655	0.629381	4.92998e-06
ENSG00000225828	0.855134	4.90399e-06
ENSG00000139178	0.51659	4.79937e-06
ENSG00000104863	0.71405	4.68782e-06
ENSG00000237049	1.35623	4.4721e-06
ENSG00000175182	0.49533	4.41566e-06
ENSG00000069399	0.901031	3.5164e-06
ENSG00000186352	0.6427	3.16681e-06
ENSG00000162433	0.493522	3.07662e-06
ENSG00000165813	0.738213	2.97406e-06
ENSG00000224032	0.525346	2.97031e-06
ENSG00000132510	0.680975	2.56648e-06
ENSG00000196436	0.880968	2.52624e-06
ENSG00000237748	0.577581	2.41331e-06
ENSG00000263740	1.56375	2.40627e-06
ENSG00000148926	0.667052	2.2463e-06
ENSG00000225973	0.674299	2.19215e-06
ENSG00000254813	0.595168	2.1291e-06
ENSG00000024422	0.569134	2.11982e-06
ENSG00000111711	0.521514	2.04656e-06
ENSG00000104081	0.788958	2.02597e-06
ENSG00000256309	1.39799	1.95687e-06
ENSG00000088766	0.528809	1.81592e-06
ENSG00000241494	0.496314	1.79809e-06
ENSG00000260539	0.492851	1.7509e-06
ENSG00000071991	0.797536	1.7217e-06
ENSG00000258357	0.523726	1.68381e-06
ENSG00000233137	0.490579	1.64362e-06
ENSG00000225177	0.54983	1.44559e-06
ENSG00000171462	1.49908	1.39477e-06
ENSG00000184979	0.582794	1.38411e-06
ENSG00000265401	0.931019	1.37765e-06
ENSG00000204186	0.665605	1.30127e-06
ENSG00000095383	0.665622	1.26948e-06
ENSG00000203778	0.704589	1.22794e-06
ENSG00000143590	0.821704	1.06495e-06
ENSG00000237077	0.519393	1.03896e-06
ENSG00000164778	0.626292	9.22636e-07
ENSG00000100359	0.547502	8.8675e-07
ENSG00000162300	0.505583	8.65583e-07
ENSG00000269028	1.12675	7.60468e-07
ENSG00000043462	0.53368	7.3664e-07
ENSG00000172716	0.638757	6.72427e-07
ENSG00000047346	0.898205	6.32575e-07
ENSG00000147996	0.548632	6.3225e-07
ENSG00000128590	0.588669	5.71742e-07
ENSG00000109534	0.663069	5.29977e-07
ENSG00000023287	0.604776	5.22541e-07
ENSG00000128609	0.511381	5.06499e-07
ENSG00000203446	0.631246	4.84654e-07
ENSG00000101457	0.570887	4.7563e-07
ENSG00000181744	0.805444	4.68142e-07
ENSG00000152689	1.81101	4.43374e-07
ENSG00000152192	0.608081	4.3008e-07
ENSG00000239508	0.525662	3.90799e-07
ENSG00000162490	0.580614	3.85787e-07
ENSG00000023902	0.553172	3.7792e-07
ENSG00000166912	0.57269	3.1428e-07
ENSG00000165355	0.547403	3.0033e-07
ENSG00000233461	0.593744	2.79619e-07
ENSG00000160226	0.583064	2.67427e-07
ENSG00000254373	0.657863	2.14718e-07
ENSG00000166130	0.519021	2.09906e-07
ENSG00000270504	0.507681	2.09889e-07
ENSG00000166352	0.5537	2.08272e-07
ENSG00000106617	0.944924	2.05413e-07
ENSG00000204128	0.674226	1.93907e-07
ENSG00000130775	0.634466	1.87994e-07
ENSG00000232457	0.585012	1.86953e-07
ENSG00000083937	0.500606	1.72408e-07
ENSG00000261195	0.634451	1.70485e-07
ENSG00000130363	0.508201	1.59632e-07
ENSG00000072274	0.5213	1.55145e-07
ENSG00000137494	0.549945	1.4274e-07
ENSG00000205333	1.50911	1.40771e-07
ENSG00000115267	0.767443	1.39504e-07
ENSG00000153989	0.495898	1.32176e-07
ENSG00000196236	0.498038	1.31796e-07
ENSG00000217801	1.00168	1.26306e-07
ENSG00000139832	0.743219	1.20579e-07
ENSG00000256060	0.680574	1.19619e-07
ENSG00000188994	0.788767	1.14158e-07
ENSG00000179119	0.52824	9.73482e-08
ENSG00000144747	0.624988	9.6655e-08
ENSG00000260359	0.697699	9.54112e-08
ENSG00000162910	0.526861	8.94462e-08
ENSG00000107077	0.672639	8.35606e-08
ENSG00000069812	1.99729	8.0312e-08
ENSG00000083223	0.514254	7.76275e-08
ENSG00000081803	0.558467	7.46856e-08
ENSG00000181126	1.00251	7.21503e-08
ENSG00000128923	0.690802	7.14779e-08
ENSG00000175866	0.572934	6.64527e-08
ENSG00000204790	0.526733	6.55454e-08
ENSG00000157502	1.48107	6.33949e-08
ENSG00000256210	0.534855	6.22766e-08
ENSG00000204054	0.50951	6.08671e-08
ENSG00000143882	1.88736	5.79745e-08
ENSG00000231890	1.10553	5.66321e-08
ENSG00000213935	0.953229	5.49115e-08
ENSG00000186635	0.515764	5.44203e-08
ENSG00000164463	0.791858	4.98565e-08
ENSG00000114388	0.51614	4.5149e-08
ENSG00000088970	0.601427	4.50035e-08
ENSG00000257773	0.491236	4.49436e-08
ENSG00000197903	0.596349	4.02432e-08
ENSG00000229607	0.705759	3.96575e-08
ENSG00000119878	0.549252	3.94901e-08
ENSG00000174939	0.530929	3.89212e-08
ENSG00000111653	0.54441	3.38798e-08
ENSG00000114796	0.721647	3.18228e-08
ENSG00000230756	0.7473	2.89156e-08
ENSG00000114626	0.655546	2.89151e-08
ENSG00000176406	0.867747	2.72997e-08
ENSG00000197496	0.507782	2.692e-08
ENSG00000253146	1.05404	2.65479e-08
ENSG00000112902	0.594645	2.06483e-08
ENSG00000072422	0.581752	1.95471e-08
ENSG00000182646	0.633862	1.86519e-08
ENSG00000251583	0.606974	1.74795e-08
ENSG00000106803	0.503546	1.74415e-08
ENSG00000159860	2.05756	1.7219e-08
ENSG00000116977	0.580558	1.66985e-08
ENSG00000106688	0.724777	1.62155e-08
ENSG00000073803	0.521051	1.58181e-08
ENSG00000258486	0.803537	1.48988e-08
ENSG00000229023	0.828395	1.42012e-08
ENSG00000153234	0.875528	1.33664e-08
ENSG00000262470	0.736693	1.31046e-08
ENSG00000151690	0.496022	1.14239e-08
ENSG00000122507	0.668589	1.1013e-08
ENSG00000100934	0.617326	1.07855e-08
ENSG00000168763	0.5706	1.04184e-08
ENSG00000224094	0.604487	1.01912e-08
ENSG00000053254	0.582496	8.2602e-09
ENSG00000267100	0.655685	8.19782e-09
ENSG00000259918	0.528347	8.14701e-09
ENSG00000164494	0.524665	8.0108e-09
ENSG00000104946	0.496201	7.85708e-09
ENSG00000094975	0.568554	6.64261e-09
ENSG00000237232	0.71701	6.30352e-09
ENSG00000174132	0.766939	5.63004e-09
ENSG00000061987	0.649372	5.10111e-09
ENSG00000204344	0.750261	5.04992e-09
ENSG00000231721	1.07165	4.95851e-09
ENSG00000136935	0.538786	4.72652e-09
ENSG00000123447	0.630339	4.6114e-09
ENSG00000136052	1.12105	4.41036e-09
ENSG00000125356	0.599875	4.40344e-09
ENSG00000012822	0.513203	3.83217e-09
ENSG00000257727	0.541251	3.81505e-09
ENSG00000117410	0.509117	3.80797e-09
ENSG00000258707	1.3969	3.49918e-09
ENSG00000165915	0.504709	2.72908e-09
ENSG00000130829	0.709822	2.55183e-09
ENSG00000174720	0.572622	2.20424e-09
ENSG00000182827	0.597981	1.93844e-09
ENSG00000154217	0.519041	1.90966e-09
ENSG00000143457	0.557081	1.80112e-09
ENSG00000164989	0.76733	1.62997e-09
ENSG00000128311	0.547454	1.59082e-09
ENSG00000232858	0.792381	1.4731e-09
ENSG00000213290	0.495733	1.44984e-09
ENSG00000254779	1.3996	1.4389e-09
ENSG00000114423	0.599483	1.36745e-09
ENSG00000119508	0.754717	1.32724e-09
ENSG00000203386	0.728906	1.32619e-09
ENSG00000268621	0.884826	1.26326e-09
ENSG00000186951	0.595841	1.12189e-09
ENSG00000185022	0.510314	1.11196e-09
ENSG00000164442	0.733984	1.07095e-09
ENSG00000235590	0.839376	1.03154e-09
ENSG00000122884	0.637018	9.75588e-10
ENSG00000147852	0.630266	7.85509e-10
ENSG00000172375	0.656128	7.70926e-10
ENSG00000188522	0.532134	7.3707e-10
ENSG00000121410	0.733201	6.8627e-10
ENSG00000143891	0.573733	6.55558e-10
ENSG00000163884	0.605636	6.16471e-10
ENSG00000133134	0.872656	5.2726e-10
ENSG00000078246	0.50231	5.06991e-10
ENSG00000152256	0.857631	4.75751e-10
ENSG00000090238	0.894642	4.25047e-10
ENSG00000151135	0.641661	3.97013e-10
ENSG00000112511	0.541015	3.55314e-10
ENSG00000114268	0.710621	3.54703e-10
ENSG00000080031	1.17535	3.28909e-10
ENSG00000052795	0.612997	3.21926e-10
ENSG00000164849	1.36037	3.11406e-10
ENSG00000133135	0.50722	2.68331e-10
ENSG00000114023	0.602197	2.58789e-10
ENSG00000256545	0.865289	1.84928e-10
ENSG00000145088	1.0538	1.82933e-10
ENSG00000129562	0.503103	1.73684e-10
ENSG00000158828	0.524901	1.66406e-10
ENSG00000159082	0.614446	1.33122e-10
ENSG00000186472	0.741307	1.057e-10
ENSG00000183508	0.616435	1.05376e-10
ENSG00000134285	0.780473	9.65261e-11
ENSG00000147905	0.668791	8.89947e-11
ENSG00000135241	0.601683	8.69058e-11
ENSG00000256745	0.550355	8.70084e-11
ENSG00000113615	0.649553	7.98261e-11
ENSG00000169174	0.675122	5.83175e-11
ENSG00000175137	0.690668	5.73693e-11
ENSG00000204438	0.56675	4.73147e-11
ENSG00000127922	0.563687	4.61449e-11
ENSG00000106772	0.980528	4.04899e-11
ENSG00000160058	0.491749	4.04901e-11
ENSG00000109572	0.559208	3.9463e-11
ENSG00000128534	0.559912	3.85567e-11
ENSG00000179292	1.68874	3.68073e-11
ENSG00000141696	0.63136	3.68022e-11
ENSG00000166562	0.546165	2.76607e-11
ENSG00000139112	0.526689	2.74351e-11
ENSG00000248968	0.694535	2.52811e-11
ENSG00000196843	0.715699	2.19618e-11
ENSG00000166579	0.558319	2.12218e-11
ENSG00000144591	0.638618	1.98134e-11
ENSG00000265150	1.02059	1.94419e-11
ENSG00000063854	0.627276	1.94469e-11
ENSG00000100307	0.4996	1.8504e-11
ENSG00000217027	0.862743	1.73096e-11
ENSG00000230061	0.78595	1.6886e-11
ENSG00000176998	0.803185	1.60265e-11
ENSG00000198961	0.675887	1.56761e-11
ENSG00000082996	0.490858	1.34432e-11
ENSG00000136152	0.703903	1.21467e-11
ENSG00000229400	0.729228	9.72981e-12
ENSG00000101197	0.614903	9.37859e-12
ENSG00000226510	1.26964	9.26392e-12
ENSG00000153066	0.539525	8.42136e-12
ENSG00000135185	0.638723	7.82006e-12
ENSG00000121064	0.499127	7.60717e-12
ENSG00000133112	0.517664	7.20131e-12
ENSG00000196507	0.544821	7.15306e-12
ENSG00000165030	0.622349	6.64857e-12
ENSG00000079150	0.762981	6.5796e-12
ENSG00000185418	0.950717	6.47177e-12
ENSG00000153993	1.43763	6.32731e-12
ENSG00000052126	0.74781	6.0527e-12
ENSG00000062716	0.56147	5.72853e-12
ENSG00000204642	0.506673	5.7034e-12
ENSG00000128309	0.625057	5.41247e-12
ENSG00000110852	1.31654	5.25515e-12
ENSG00000096696	1.09684	5.01838e-12
ENSG00000121749	0.74552	4.96627e-12
ENSG00000011478	0.494001	4.94888e-12
ENSG00000120727	0.499511	4.79989e-12
ENSG00000167797	0.794023	4.35726e-12
ENSG00000124370	1.08022	4.31262e-12
ENSG00000153233	1.01647	3.63841e-12
ENSG00000183674	0.491799	2.69551e-12
ENSG00000133103	0.88284	2.34343e-12
ENSG00000184840	0.581025	1.9826e-12
ENSG00000153485	0.552061	1.97435e-12
ENSG00000164244	0.682276	1.89387e-12
ENSG00000076043	0.558182	1.86614e-12
ENSG00000111229	0.542432	1.78347e-12
ENSG00000134049	0.585925	1.73129e-12
ENSG00000160991	0.602679	1.57765e-12
ENSG00000109083	0.786489	1.49553e-12
ENSG00000236013	0.868241	1.47411e-12
ENSG00000108932	0.678892	1.3328e-12
ENSG00000105376	1.50929	1.29586e-12
ENSG00000141526	0.627527	1.20645e-12
ENSG00000099246	0.65793	1.09332e-12
ENSG00000184515	3.37501	1.04136e-12
ENSG00000142186	0.554032	9.89029e-13
ENSG00000116761	0.745014	9.86383e-13
ENSG00000104213	0.791171	9.43193e-13
ENSG00000010219	0.803243	9.39556e-13
ENSG00000107651	0.614034	8.76922e-13
ENSG00000113621	0.566117	6.99978e-13
ENSG00000197258	0.492425	6.61414e-13
ENSG00000127663	0.518036	6.11376e-13
ENSG00000068971	0.888697	6.06367e-13
ENSG00000111678	0.718491	5.22259e-13
ENSG00000013375	0.692911	4.70632e-13
ENSG00000237973	0.890895	4.22665e-13
ENSG00000036054	0.720467	4.23305e-13
ENSG00000115806	0.574744	3.82399e-13
ENSG00000272449	1.04286	3.72234e-13
ENSG00000147509	0.681633	3.71955e-13
ENSG00000169826	0.66323	2.93722e-13
ENSG00000099337	1.6179	2.53866e-13
ENSG00000100284	0.62483	2.36423e-13
ENSG00000110047	0.579383	2.36533e-13
ENSG00000162368	0.490833	2.18549e-13
ENSG00000115520	0.584957	1.57178e-13
ENSG00000135541	0.777587	1.51376e-13
ENSG00000106080	0.747141	1.20069e-13
ENSG00000100650	0.50453	1.20109e-13
ENSG00000179632	0.61305	1.14147e-13
ENSG00000109390	0.59988	1.11839e-13
ENSG00000119801	0.559236	1.04845e-13
ENSG00000131398	1.38422	9.2196e-14
ENSG00000101928	0.846756	8.82578e-14
ENSG00000141446	0.784595	8.68787e-14
ENSG00000145901	0.606433	8.40699e-14
ENSG00000142552	0.801897	8.0042e-14
ENSG00000224546	0.512856	7.85077e-14
ENSG00000123933	0.994341	6.83705e-14
ENSG00000249815	1.04978	5.11934e-14
ENSG00000135924	0.690886	4.40545e-14
ENSG00000074695	0.7147	4.29369e-14
ENSG00000136240	0.740299	4.00952e-14
ENSG00000167657	0.644927	2.7218e-14
ENSG00000145194	0.812551	2.31446e-14
ENSG00000074842	0.539422	2.20449e-14
ENSG00000178878	0.573877	1.85313e-14
ENSG00000163683	1.09413	1.65949e-14
ENSG00000240024	0.753396	1.61797e-14
ENSG00000134697	0.494215	1.32996e-14
ENSG00000164609	0.536787	1.28493e-14
ENSG00000120742	0.550789	1.26516e-14
ENSG00000172183	0.798436	1.10956e-14
ENSG00000108551	1.78245	1.08845e-14
ENSG00000115649	0.515408	8.8714e-15
ENSG00000060069	0.802914	7.5727e-15
ENSG00000172269	0.633929	7.36728e-15
ENSG00000212907	1.00182	7.02117e-15
ENSG00000140379	0.492261	6.40934e-15
ENSG00000232742	0.637545	5.98887e-15
ENSG00000165516	0.855341	5.72082e-15
ENSG00000127585	1.38756	4.61533e-15
ENSG00000076662	0.810717	4.15511e-15
ENSG00000158022	0.799916	3.76531e-15
ENSG00000167536	0.918291	3.01998e-15
ENSG00000141084	0.546379	2.91671e-15
ENSG00000145740	0.777632	2.24498e-15
ENSG00000152137	0.507567	1.70528e-15
ENSG00000260916	0.720781	1.69756e-15
ENSG00000196352	0.49635	1.59631e-15
ENSG00000196072	0.668948	1.21744e-15
ENSG00000132254	0.689158	1.09753e-15
ENSG00000136770	0.656238	1.06129e-15
ENSG00000133138	0.821298	9.60798e-16
ENSG00000138768	0.736989	8.65764e-16
ENSG00000129990	1.39473	8.35643e-16
ENSG00000214274	1.60474	8.31841e-16
ENSG00000102100	0.647464	8.01336e-16
ENSG00000005238	0.615196	7.16459e-16
ENSG00000273131	1.24969	6.29191e-16
ENSG00000095139	0.637912	5.35035e-16
ENSG00000124839	0.701106	5.32111e-16
ENSG00000137171	0.852416	4.61763e-16
ENSG00000229344	1.18643	4.1159e-16
ENSG00000118785	0.738928	3.70553e-16
ENSG00000105649	0.883918	3.39286e-16
ENSG00000146085	0.625663	3.15694e-16
ENSG00000136643	0.662348	2.04984e-16
ENSG00000152409	0.927606	1.97733e-16
ENSG00000102401	0.617344	1.96182e-16
ENSG00000123240	0.588097	1.63282e-16
ENSG00000135047	0.744596	1.59089e-16
ENSG00000220785	0.5952	1.42489e-16
ENSG00000164096	0.731286	1.27384e-16
ENSG00000211459	0.649479	1.22545e-16
ENSG00000100376	0.524397	1.05492e-16
ENSG00000182670	0.541766	8.57653e-17
ENSG00000115339	0.742189	8.23583e-17
ENSG00000172057	0.674067	6.60494e-17
ENSG00000173221	0.655967	5.62138e-17
ENSG00000253882	2.52583	5.5391e-17
ENSG00000162236	0.812217	4.09074e-17
ENSG00000177383	0.575314	3.46894e-17
ENSG00000148396	0.574666	3.3125e-17
ENSG00000234616	0.687545	3.14114e-17
ENSG00000141756	0.560739	2.58168e-17
ENSG00000162373	2.36531	2.34098e-17
ENSG00000146859	0.580696	2.30411e-17
ENSG00000158109	0.535019	1.76529e-17
ENSG00000105976	0.742365	1.48027e-17
ENSG00000260802	1.11321	1.44652e-17
ENSG00000123989	0.683263	1.29495e-17
ENSG00000137207	0.589288	6.79589e-18
ENSG00000095380	0.715994	5.18865e-18
ENSG00000132432	0.956872	4.2318e-18
ENSG00000188760	1.0172	3.11205e-18
ENSG00000258791	0.607173	2.52595e-18
ENSG00000111801	0.770978	1.35918e-18
ENSG00000079332	0.616855	1.25862e-18
ENSG00000066455	0.681258	1.24524e-18
ENSG00000027697	0.56369	1.18157e-18
ENSG00000204348	0.757516	1.12294e-18
ENSG00000177380	0.702785	1.0885e-18
ENSG00000220205	0.571224	9.83794e-19
ENSG00000100219	0.496218	8.65223e-19
ENSG00000143847	1.26021	7.37543e-19
ENSG00000151117	1.00129	7.14127e-19
ENSG00000205710	1.83706	6.43913e-19
ENSG00000187266	0.885838	5.44556e-19
ENSG00000162032	0.818506	5.40866e-19
ENSG00000198888	1.18162	5.15838e-19
ENSG00000203306	0.674762	4.83336e-19
ENSG00000108840	0.972705	3.23429e-19
ENSG00000137414	0.831857	3.09019e-19
ENSG00000177181	1.64196	3.0253e-19
ENSG00000166900	0.608647	2.67077e-19
ENSG00000164294	0.749917	1.90917e-19
ENSG00000198840	0.904909	1.77277e-19
ENSG00000183258	0.688807	1.51474e-19
ENSG00000087086	0.640112	1.0107e-19
ENSG00000153037	0.647787	8.38204e-20
ENSG00000119777	0.634735	7.70557e-20
ENSG00000214530	0.85664	4.96235e-20
ENSG00000197530	0.816552	3.61688e-20
ENSG00000110917	0.538827	2.97362e-20
ENSG00000008952	0.709252	2.78705e-20
ENSG00000185043	0.806814	2.68127e-20
ENSG00000141458	0.578395	2.10627e-20
ENSG00000270164	2.43098	1.47935e-20
ENSG00000105438	0.64835	1.47055e-20
ENSG00000125740	1.45092	7.6434e-21
ENSG00000253490	0.57768	5.43022e-21
ENSG00000131446	0.597278	3.67779e-21
ENSG00000198380	0.632468	3.31255e-21
ENSG00000260708	1.03908	2.68272e-21
ENSG00000073150	0.765418	2.50327e-21
ENSG00000159479	0.66351	1.67019e-21
ENSG00000144867	0.642	1.66298e-21
ENSG00000152700	0.654034	1.48595e-21
ENSG00000106537	0.860799	1.4518e-21
ENSG00000069974	0.557662	1.3498e-21
ENSG00000125352	0.728491	1.2756e-21
ENSG00000166793	1.42557	8.73893e-22
ENSG00000105520	0.726757	6.97967e-22
ENSG00000076356	1.23944	6.66742e-22
ENSG00000117385	0.754279	4.18598e-22
ENSG00000162298	0.778519	3.95401e-22
ENSG00000145817	0.798026	2.6801e-22
ENSG00000101194	0.654957	2.03016e-22
ENSG00000197006	0.636034	1.92205e-22
ENSG00000173230	0.902841	1.82506e-22
ENSG00000145040	1.14683	1.7883e-22
ENSG00000138069	0.561875	1.47158e-22
ENSG00000225630	1.22307	1.45555e-22
ENSG00000178150	0.9991	1.00503e-22
ENSG00000150593	0.836087	9.26072e-23
ENSG00000187479	1.36967	7.36255e-23
ENSG00000163516	0.822337	7.21064e-23
ENSG00000120686	0.868183	5.49375e-23
ENSG00000198886	1.06037	2.8241e-23
ENSG00000185222	0.771881	1.36661e-23
ENSG00000008513	0.638782	1.2558e-23
ENSG00000095794	0.907952	1.06832e-23
ENSG00000126947	0.774399	1.01563e-23
ENSG00000136986	0.610646	8.04104e-24
ENSG00000123892	0.535936	7.68528e-24
ENSG00000077498	0.570589	7.18538e-24
ENSG00000228328	0.586693	4.54559e-24
ENSG00000090615	1.08532	4.2053e-24
ENSG00000113163	0.986041	4.18985e-24
ENSG00000114395	0.906488	3.62969e-24
ENSG00000134899	0.922917	1.93712e-24
ENSG00000158470	0.854013	1.74357e-24
ENSG00000168495	0.761226	1.53893e-24
ENSG00000138433	0.776356	1.29302e-24
ENSG00000154027	0.988541	1.04248e-24
ENSG00000248527	1.02542	9.32605e-25
ENSG00000075240	0.724404	5.42708e-25
ENSG00000228253	1.25303	5.08073e-25
ENSG00000130703	0.669399	3.36838e-25
ENSG00000051108	0.735677	3.3255e-25
ENSG00000198727	1.10145	2.98985e-25
ENSG00000128335	0.903087	2.65874e-25
ENSG00000100883	0.81159	2.1109e-25
ENSG00000089876	0.668101	1.30554e-25
ENSG00000129083	0.693495	1.06812e-25
ENSG00000198899	1.02694	8.50147e-26
ENSG00000147535	0.926657	3.14589e-26
ENSG00000227297	0.763206	2.80134e-26
ENSG00000110048	0.698608	1.8038e-26
ENSG00000198804	0.999515	1.08808e-26
ENSG00000066027	0.704485	5.93263e-27
ENSG00000105404	0.996935	4.56089e-27
ENSG00000239704	1.29393	3.65106e-27
ENSG00000111674	0.715557	3.1468e-27
ENSG00000105856	1.20105	2.14284e-27
ENSG00000239264	0.512158	2.00115e-27
ENSG00000104907	0.738805	1.80691e-27
ENSG00000156345	1.12071	1.18894e-27
ENSG00000182934	0.602468	7.49691e-28
ENSG00000170379	2.24767	7.37716e-28
ENSG00000255112	0.713381	2.88674e-28
ENSG00000144674	0.707441	2.67039e-28
ENSG00000069667	2.10592	1.92745e-28
ENSG00000184432	0.778619	1.31207e-28
ENSG00000198695	1.39271	1.44594e-29
ENSG00000213859	1.34786	1.42947e-29
ENSG00000122218	0.566423	1.20103e-29
ENSG00000136868	0.636376	6.49874e-30
ENSG00000117394	0.556949	3.73782e-30
ENSG00000177951	0.768495	2.99063e-30
ENSG00000136881	0.806074	2.27651e-30
ENSG00000156804	0.629857	2.2304e-30
ENSG00000101199	0.723448	1.71666e-30
ENSG00000102316	0.684359	1.59241e-30
ENSG00000160570	1.00885	1.20644e-30
ENSG00000198938	0.867229	1.1839e-30
ENSG00000174851	1.15689	9.60785e-31
ENSG00000136802	0.751917	7.21823e-31
ENSG00000103888	1.24	5.55874e-31
ENSG00000131871	0.657808	3.2098e-31
ENSG00000104419	1.35144	2.67978e-31
ENSG00000198763	1.29222	2.67488e-31
ENSG00000083544	0.637803	2.50441e-31
ENSG00000026751	0.710584	4.8911e-32
ENSG00000091542	0.66478	3.97051e-32
ENSG00000259401	1.59269	2.84767e-32
ENSG00000004846	0.788807	1.95674e-32
ENSG00000198786	1.17702	1.33219e-32
ENSG00000150991	0.704906	1.01795e-32
ENSG00000095397	0.948041	6.15111e-33
ENSG00000112379	1.33776	5.08548e-33
ENSG00000112473	0.872891	2.69402e-33
ENSG00000072682	0.879322	5.46444e-34
ENSG00000247095	1.84973	5.19002e-34
ENSG00000242247	0.762014	3.74361e-34
ENSG00000125629	1.11525	9.25121e-35
ENSG00000102580	0.750049	5.37815e-35
ENSG00000135766	0.828278	5.00597e-36
ENSG00000168701	1.17273	2.87257e-36
ENSG00000108433	0.78944	5.61293e-38
ENSG00000090104	1.95937	4.7806e-38
ENSG00000150961	0.977314	1.79002e-38
ENSG00000148358	0.742421	9.55214e-39
ENSG00000172071	1.3444	8.76653e-39
ENSG00000104765	0.85478	2.92549e-39
ENSG00000165943	0.848892	2.33763e-39
ENSG00000033100	0.867924	2.09076e-39
ENSG00000181789	0.699348	1.15243e-39
ENSG00000181458	1.57752	6.24214e-40
ENSG00000070081	0.874865	2.36278e-40
ENSG00000262222	1.97173	2.10418e-40
ENSG00000117682	0.789006	1.18307e-40
ENSG00000068912	0.917758	8.96481e-41
ENSG00000006075	2.39073	3.4096e-41
ENSG00000205786	0.879022	6.42341e-42
ENSG00000187601	1.1942	4.62816e-42
ENSG00000129226	0.680873	1.58961e-42
ENSG00000198712	1.11131	9.74706e-43
ENSG00000225106	0.988095	3.22159e-43
ENSG00000127526	0.771013	1.01235e-44
ENSG00000107175	1.3255	7.34667e-45
ENSG00000138674	0.741186	2.10156e-45
ENSG00000079308	0.937517	5.96939e-46
ENSG00000179222	0.738878	3.62118e-46
ENSG00000120805	1.12469	1.7244e-47
ENSG00000210082	1.04389	1.57294e-47
ENSG00000148154	1.38758	6.17652e-48
ENSG00000167110	1.28052	6.3017e-54
ENSG00000271525	1.44962	8.76269e-55
ENSG00000125931	1.41862	1.69171e-55
ENSG00000134160	0.927473	1.55862e-56
ENSG00000157020	1.0656	1.95709e-57
ENSG00000176171	1.40774	2.50114e-58
ENSG00000197106	1.20847	2.27624e-58
ENSG00000125304	0.983071	2.00737e-62
ENSG00000130733	1.38932	1.46197e-62
ENSG00000147614	1.07958	7.2252e-66
ENSG00000223380	0.972175	7.226e-67
ENSG00000119899	1.43446	2.78085e-87
ENSG00000175899	1.09375	5.32158e-95
ENSG00000124785	1.46219	6.23556e-102
ENSG00000168374	1.42772	6.59807e-109
ENSG00000197358	1.57641	4.41974e-118
ENSG00000153395	1.48632	7.27964e-122
ENSG00000145860	1.67015	5.38287e-140
ENSG00000100196	1.65097	1.37427e-202

## Sheet: DEG_Proteomics_E12 vs NC
UniProt ID	Gene name	logFC	P.Value
O95999	BCL10	-2.91847	0.000897
Q8TBE9	NANP	-2.49909	0.008193
Q96T37	RBM15	-2.44162	1.5e-08
Q9UFC0	LRWD1	-2.06075	2.33e-12
P35268	RPL22	-1.80461	0.008246
Q8WXX5	DNAJC9	-1.77602	0.000143
Q9BX68	HINT2	-1.71353	0.039086
Q96FJ0	STAMBPL1	-1.68756	0.00334
Q8TEY7	USP33	-1.6575	0.033989
P61956	SUMO2	-1.64512	0.005058
Q16762	TST	-1.62992	1.79e-12
Q8NFH5	NUP35	-1.58875	0.001272
P35754	GLRX	-1.56217	0.014824
Q8NEY1	NAV1	-1.55088	0.047475
Q8WVP7	LMBR1	-1.5287	6.25e-05
Q9BRP1	PDCD2L	-1.52742	0.002809
O94842	TOX4	-1.49764	0.022457
O43752	STX6	-1.49238	1.05e-17
Q9BPZ3	PAIP2	-1.46017	0.023336
Q9NZN4	EHD2	-1.44073	0.008977
Q7L1T6	CYB5R4	-1.41596	0.003191
Q9UJT0	TUBE1	-1.27647	0.005171
Q9GZS1	POLR1E	-1.26098	0.007289
Q16799	RTN1	-1.23516	0.002617
P34059	GALNS	-1.22582	0.000376
Q8NDV7	TNRC6A	-1.22424	0.050037
O60921	HUS1	-1.2009	1.36e-07
Q96J01	THOC3	-1.18428	0.016708
O75317	USP12	-1.18129	0.032081
Q8WUH1	CHURC1	-1.14464	0.004844
Q9UIV1	CNOT7	-1.12466	1.35e-08
P05114	HMGN1	-1.1174	0.026362
Q2VPB7	AP5B1	-1.10165	0.004441
Q10471	GALNT2	-1.09759	3.57e-15
O60573	EIF4E2	-1.09555	7.93e-05
Q8N2F6	ARMC10	-1.09196	0.007855
Q10472	GALNT1	-1.09196	0.007855
Q9Y5B0	CTDP1	-1.06238	0.029659
P28288	ABCD3	-1.0606	7.91e-07
P48060	GLIPR1	-1.05478	0.018522
Q86WX3	RPS19BP1	-1.05115	0.029815
Q5EBL8	PDZD11	-1.03581	0.049892
P36959	GMPR	-1.03222	4.32e-09
Q05932	FPGS	-1.02294	4.95e-05
Q9Y294	ASF1A	-1.01933	0.003636
Q8N4Q0	ZADH2	-1.01808	0.010428
P56134	ATP5MF	-1.01423	0.016473
Q9HBI1	PARVB	2.11365	0.0120832
Q92541	RTF1	1.92006	0.0281568
Q9BVC5	C2orf49	1.76956	0.034904
Q8NHQ9	DDX55	1.72432	0.0243437
Q8N335	GPD1L	1.64355	0.00473643
Q9NX55	HYPK	1.58913	0.0146295
P0DN76	U2AF1L5	1.57376	0.0202886
Q13595	TRA2A	1.53735	0.0116384
Q9BVC4	MLST8	1.52843	0.0479768
Q9BYV8	CEP41	1.5046	0.0125738
Q53SF7	COBLL1	1.48978	0.0235148
Q9UK61	TASOR	1.48915	0.000160969
Q6A1A2	PDPK2P	1.46696	0.00886025
B4DH59	NBPF26	1.4477	0.0206367
Q96GA3	LTV1	1.37651	0.0048052
Q5T6F2	UBAP2	1.37597	0.0312094
P45983	MAPK8	1.36833	0.0310306
P07225	PROS1	1.31684	0.00584004
O15047	SETD1A	1.31466	0.00464817
Q9UPN7	PPP6R1	1.27344	0.00386882
P78559	MAP1A	1.2532	0.00019419
P18615	NELFE	1.23833	0.0129662
Q7Z7A3	CTU1	1.23435	0.010258
P28715	ERCC5	1.2015	0.0444414
Q9H6E4	CCDC134	1.19845	0.00975983
Q9BWJ5	SF3B5	1.15972	0.0514281
Q9HCN8	SDF2L1	1.15015	0.0133603
P46934	NEDD4	1.14242	0.00175837
Q9H0B6	KLC2	1.13692	0.00743227
P47914	RPL29	1.12895	0.0231191
Q9BSY4	CHCHD5	1.12863	0.0344091
O75607	NPM3	1.09817	0.00537361
P62888	RPL30	1.08426	0.00298815
Q5T6V5	C9orf64	1.0788	0.00791128
Q8WUA4	GTF3C2	1.0753	0.012654
P29558	RBMS1	1.0468	0.000753527
Q16186	ADRM1	1.04311	0.0116931
P20962	PTMS	1.03117	0.00274882
P36405	ARL3	1.02452	0.0054539
Q9UPT9	USP22	1.01548	0.0274392
Q96S59	RANBP9	1.00832	0.0121532

## Sheet: DEG_Proteomics_E32 vs NC
UniProt ID	Gene name	logFC	P.Value
Q96T37	RBM15	-3.19906	2.89e-11
Q2VPB7	AP5B1	-2.46566	7.89e-08
Q16762	TST	-2.31526	9.17e-17
Q8WVP7	LMBR1	-2.26764	1.12e-07
Q9UFC0	LRWD1	-2.24213	2.44e-13
O60921	HUS1	-1.98545	1.14e-12
O43752	STX6	-1.86339	1.13e-20
Q10471	GALNT2	-1.84272	5.08e-22
Q8N954	GPATCH11	-1.74629	0.001838
Q9H7D7	WDR26	-1.7306	4.87e-12
P36959	GMPR	-1.62374	4.84e-14
Q9P1Y6	PHRF1	-1.58137	0.008489
Q9H4L7	SMARCAD1	-1.51838	2.8e-16
P61956	SUMO2	-1.50335	0.007551
Q9UIV1	CNOT7	-1.46118	3.09e-11
Q9ULX6	AKAP8L	-1.45508	0.050435
Q8WXA3	RUFY2	-1.34203	4.62e-07
Q05932	FPGS	-1.30715	1.06e-06
P62318	SNRPD3	-1.25214	2.79e-11
P28288	ABCD3	-1.23126	4.52e-08
P85037	FOXK1	-1.21541	0.040718
Q9Y6C9	MTCH2	-1.21221	3.24e-05
Q8N4Q0	ZADH2	-1.14804	0.004333
Q15545	TAF7	-1.13034	4.58e-15
Q96J01	THOC3	-1.11864	0.02318
Q8IWW6	ARHGAP12	-1.07456	7.46e-06
Q15031	LARS2	-1.05071	0.034786
P60468	SEC61B	-1.01927	0.011966
Q8NI22	MCFD2	3.60766	0.00014
Q9BSJ2	TUBGCP2	3.40892	0.001625
Q8NEW0	SLC30A7	2.68803	0.002224
Q9HBI1	PARVB	2.38882	0.005074
Q92541	RTF1	2.31761	0.009079
P61599	NAA20	2.0625	0.02887
P38935	IGHMBP2	1.98622	0.008601
Q460N5	PARP14	1.96367	0.012186
Q9H6E4	CCDC134	1.96135	8.09e-05
Q9UJX2	CDC23	1.94759	0.051692
P62253	UBE2G1	1.90707	0.034341
P62847	RPS24	1.88949	0.022115
Q9BUL8	PDCD10	1.8892	0.02506
Q8WUA4	GTF3C2	1.84369	0.000313
Q53SF7	COBLL1	1.74932	0.0087
Q15628	TRADD	1.74599	1.52e-05
Q9Y385	UBE2J1	1.73734	0.01109
Q8N335	GPD1L	1.67649	0.004045
Q9BSY4	CHCHD5	1.65825	0.002698
O75683	SURF6	1.651	0.017507
Q9BYV8	CEP41	1.64418	0.006847
Q6UWP7	LCLAT1	1.63043	0.015324
Q96GA3	LTV1	1.62506	0.001116
Q9NX55	HYPK	1.62028	0.01295
Q9BVC4	MLST8	1.5921	0.022713
Q4G176	ACSF3	1.58123	0.025487
Q9BWJ5	SF3B5	1.57191	0.009817
Q13625	TP53BP2	1.56856	0.032355
P0DN76	U2AF1L5	1.56219	0.021155
B4DH59	NBPF26	1.55437	0.013483
Q96JI7	SPG11	1.5449	0.004643
P45983	MAPK8	1.53212	0.016633
Q9BXR0	QTRT1	1.51956	0.035017
P45877	PPIC	1.49428	0.025536
Q6A1A2	PDPK2P	1.48997	0.007945
Q7RTP6	MICAL3	1.48548	0.042944
Q13595	TRA2A	1.46944	0.01548
P28715	ERCC5	1.44889	0.016736
Q9BY41	HDAC8	1.44356	0.006627
Q9UDT6	CLIP2	1.37629	0.033282
O14735	CDIPT	1.37465	0.012094
O75531	BANF1	1.36925	0.000121
O75607	NPM3	1.3684	0.000748
Q7Z3C6	ATG9A	1.3645	0.045385
P00403	MT-CO2	1.35451	0.038653
Q6UXH1	CRELD2	1.33751	0.003164
Q9P215	POGK	1.33501	0.003469
Q96E11	MRRF	1.33352	0.024574
P78332	RBM6	1.31118	0.00253
Q8WUM9	SLC20A1	1.29408	0.053166
Q96FZ7	CHMP6	1.29262	7.04e-12
Q9NP77	SSU72	1.29036	0.014991
P22695	UQCRC2	1.28069	2.01e-06
P55160	NCKAP1L	1.27643	0.00109
P18615	NELFE	1.27414	0.010772
P36405	ARL3	1.24627	0.000976
O95777	LSM8	1.23213	0.005554
Q15334	LLGL1	1.22968	0.012246
Q9NZ01	TECR	1.22388	0.009975
P00568	AK1	1.22348	0.035151
P82663	MRPS25	1.22261	4.8e-05
P52735	VAV2	1.21439	0.000301
Q15836	VAMP3	1.21415	0.013498
P07225	PROS1	1.19861	0.011327
P68133	ACTA1	1.1984	0.002103
Q16655	MLANA	1.19466	0.009404
P07203	GPX1	1.17099	0.010885
O15111	CHUK	1.16913	0.00018
Q9HCN8	SDF2L1	1.16101	0.012584
Q9HBH5	RDH14	1.15188	0.0464
Q16891	IMMT	1.15179	0.011696
Q9P0J7	KCMF1	1.151	0.000213
Q8NE35	CPEB3	1.15022	0.011225
O15047	SETD1A	1.14827	0.012215
O75843	AP1G2	1.1455	0.030413
Q9BYN8	MRPS26	1.14092	0.014723
Q96EB1	ELP4	1.13972	0.000636
Q8WVQ1	CANT1	1.13485	0.000774
Q00653	NFKB2	1.12845	0.000289
Q14534	SQLE	1.12668	0.004042
Q8NG31	KNL1	1.11641	0.001058
A6ZKI3	RTL8C	1.10625	0.021673
Q658P3	STEAP3	1.09642	0.054519
Q86YS6	RAB43	1.09246	0.025898
A0A0B4J2D5	GATD3B	1.08439	0.001143
O75674	TOM1L1	1.08407	0.008682
O43164	PJA2	1.08161	0.030369
O95630	STAMBP	1.07881	0.002014
Q9UPN7	PPP6R1	1.07564	0.013068
P46934	NEDD4	1.07374	0.003041
Q6N063	OGFOD2	1.06817	0.016283
Q8N183	NDUFAF2	1.06734	0.00102
Q9NUW8	TDP1	1.0665	0.026614
P55809	OXCT1	1.06489	0.026065
O75131	CPNE3	1.04351	1.73e-10
Q08170	SRSF4	1.03764	0.012355
Q9UBR2	CTSZ	1.0361	0.051347
Q9Y605	MRFAP1	1.03591	0.012272
Q12830	BPTF	1.0279	0.032488
Q9NXR1	NDE1	1.02698	0.008522
Q96JG6	VPS50	1.02631	0.004252
Q9H9C1	VIPAS39	1.02314	0.017236
P29558	RBMS1	1.01858	0.000995
Q8NHH9	ATL2	1.01606	0.015062
Q01814	ATP2B2	1.01431	0.030171
Q5T6V5	C9orf64	1.01238	0.012168
P48060	GLIPR1	1.00894	0.023557
Q99623	PHB2	1.00084	0.004659
